# Supplementary material
Source: Research Square preprint supplement (doi:10.21203/rs.3.rs-9661849/v1)
Supplement: Supplementary file 1 [file 9d6980bd16182c102094a991.pdf]

## Supplementary Information

# Stable Phenanthrene-Fused 1,2,4-Triazinyl Radicals with Ultra-narrow Electrochemical Gap Enabled by Attenuated Fusion-Ring Aromaticity

Weijie Guo,<sup>a</sup> Sijia Yue,<sup>a</sup> Ran Duan,<sup>c</sup> Zhibo Yuan,<sup>a</sup> Yuqing Yao,<sup>a</sup> Hua Jiang,<sup>\*a</sup> Jing Guo,<sup>\*a</sup>  
Andrzej Rajca,<sup>\*b</sup> and Ying Wang<sup>\*a</sup>

<sup>a</sup> College of Chemistry, Beijing Normal University, Beijing 100875, China

<sup>b</sup> Department of Chemistry, University of Nebraska, Lincoln, NE 68588–0304, USA

<sup>c</sup> Institute of Chemistry, Chinese Academy of Sciences, Beijing 100190, China

Email: [jiangh@bnu.edu.cn](mailto:jiangh@bnu.edu.cn), [jguo1294@bnu.edu.cn](mailto:jguo1294@bnu.edu.cn), [arajca1@unl.edu](mailto:arajca1@unl.edu) and [ywang1@bnu.edu.cn](mailto:ywang1@bnu.edu.cn)

# Table of Contents

|                                                                                      |    |
|--------------------------------------------------------------------------------------|----|
| 1. Primary Strategies for Reducing the Electrochemical Gap .....                     | 1  |
| 2. Structures and Properties of Blatter and Its Representative Derivatives .....     | 1  |
| 3. General Procedures and Materials .....                                            | 3  |
| 4. Synthesis of Radicals <b>1</b> and <b>1-tBu</b> .....                             | 4  |
| 4.1 Synthesis of Radical <b>1</b> .....                                              | 4  |
| 4.2 Synthesis of Radical <b>1-tBu</b> .....                                          | 8  |
| 5. X-ray Crystallography .....                                                       | 11 |
| 6. Thermogravimetric Analysis/ Differential Scanning Calorimetry (TGA/DSC).....      | 14 |
| 7. UV-Vis-NIR Spectroscopy.....                                                      | 16 |
| 8. Electron Paramagnetic Resonance Spectroscopy .....                                | 18 |
| 9. Electrochemistry Measurements.....                                                | 21 |
| 10. Computational Details .....                                                      | 27 |
| 10.1 Simulated UV-vis spectra .....                                                  | 30 |
| 10.2 Molecular Orbitals.....                                                         | 33 |
| 10.3 Charge and Spin densities .....                                                 | 36 |
| 10.4 Electrochemical Gaps Calculations.....                                          | 42 |
| 10.5 NICS Calculations.....                                                          | 43 |
| 10.6 Statistical Analyses of Correlation between $\rho_{FR}$ and $E_{gap}$ .....     | 43 |
| 10.7 DFT Calculations on a Molecular Pair Extracted from the Crystal Structure ..... | 46 |
| 11. Thin Films .....                                                                 | 47 |
| 12. Routine $^1H$ NMR, $^{13}C$ NMR and HRMS Spectra of Compounds .....              | 48 |
| 13. Optimized Geometries/Coordinate Outputs of DFT Calculations.....                 | 55 |
| 14. References .....                                                                 | 65 |

## 1. Primary Strategies for Reducing the Electrochemical Gap

General strategies for reducing the electrochemical gap:

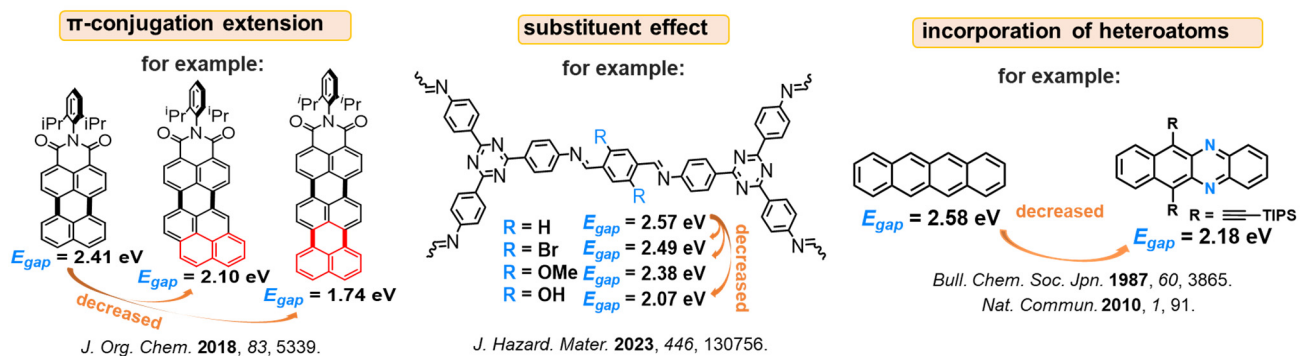

**Fig. S1.** General strategies for reducing the electrochemical gap, illustrated with selected closed-shell molecules.

## 2. Structures and Properties of Blatter and Its Representative Derivatives

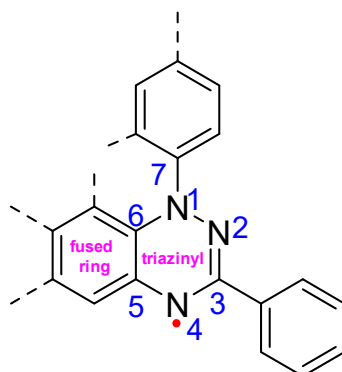

**Fig. S2.** General illustrations of the atomic labels and ring structures of the Blatter radical and its derivatives, showing only the common features. For the structure parameters related to the triazinyl and the triazinyl-fused six-membered rings as well as the experimental redox potentials and stabilities, see Table S1.

**Table S1.** Important structure parameters as well as the properties related to redox and stability of Blatter radical and its derivatives. For labels of the concerned atoms and rings, see Fig. S2.

| Method of test                                            | Items                                        | Blatter <sup>S1</sup>                      | 1                                             | 1-tBu                                         | 2 <sup>S2</sup>                            | 3 <sup>S3</sup>                            | 4 <sup>S4,S8,S13</sup>                     | 5 <sup>S4</sup>                            | 6 <sup>S5,S9</sup>                         | 7 <sup>S6</sup>                            | 8 <sup>S7</sup>                            |                                            |
|-----------------------------------------------------------|----------------------------------------------|--------------------------------------------|-----------------------------------------------|-----------------------------------------------|--------------------------------------------|--------------------------------------------|--------------------------------------------|--------------------------------------------|--------------------------------------------|--------------------------------------------|--------------------------------------------|--------------------------------------------|
| X-ray Structure                                           | CCDC #                                       | 264049                                     | 2488806                                       | /                                             | 937185                                     | 913290                                     | 1483990                                    | 1483989                                    | 854300                                     | 2070220                                    | 1897729                                    |                                            |
|                                                           | $d_{N1-N2}^a$ (Å)                            | 1.372(1)                                   | 1.375(5)                                      | /                                             | 1.364(3)                                   | 1.355(3)                                   | 1.352(9)                                   | 1.368(3)                                   | 1.3635(19)                                 | 1.3639(13)                                 | 1.373(3)                                   |                                            |
|                                                           | $d_{C3-N2}^a$ (Å)                            | 1.336(2)                                   | 1.322(6)                                      | /                                             | 1.337(4)                                   | 1.440(3)                                   | 1.325(10)                                  | 1.331(3)                                   | 1.336(2)                                   | 1.3412(14)                                 | 1.326(4)                                   |                                            |
|                                                           | $d_{C3-N4}^a$ (Å)                            | 1.333(2)                                   | 1.347(6)                                      | /                                             | 1.337(4)                                   | 1.380(3)                                   | 1.362(9)                                   | 1.340(4)                                   | 1.338(2)                                   | 1.3371(14)                                 | 1.336(4)                                   |                                            |
|                                                           | $d_{N4-C5}^a$ (Å)                            | 1.369(2)                                   | 1.363(5)                                      | /                                             | 1.357(4)                                   | 1.373(3)                                   | 1.381(10)                                  | 1.372(4)                                   | 1.368(2)                                   | 1.3760(15)                                 | 1.377(4)                                   |                                            |
|                                                           | $d_{N1-C6}^a$ (Å)                            | 1.392(2)                                   | 1.394(5)                                      | /                                             | 1.390(4)                                   | 1.380(3)                                   | 1.407(9)                                   | 1.399(4)                                   | 1.391(2)                                   | 1.3977(14)                                 | 1.397(4)                                   |                                            |
|                                                           | $\alpha_{C3-N2-N1}^b$ (°)                    | 115.6(1)                                   | 115.8(4)                                      | /                                             | 115.2(3)                                   | 115.2(2)                                   | 114.1(6)                                   | 116.3(2)                                   | 115.91(14)                                 | 116.24(9)                                  | 116.0(3)                                   |                                            |
|                                                           | $\alpha_{N2-C3-N4}^b$ (°)                    | 128.0(1)                                   | 127.1(4)                                      | /                                             | 127.4(3)                                   | 127.3(2)                                   | 130.2(8)                                   | 128.1(3)                                   | 127.86(16)                                 | 128.76(11)                                 | 128.5(3)                                   |                                            |
|                                                           | $\alpha_{C6-N1-C7}^b$ (°)                    | 123.9(1)                                   | 124.4(3)                                      | /                                             | 122.5(3)                                   | 122.6(2)                                   | 118.6(7)                                   | 123.2(2)                                   | 123.65(14)                                 | 119.38(10)                                 | 124.9(3)                                   |                                            |
|                                                           | $\alpha_{C3-N4-C5}^b$ (°)                    | 115.5(1)                                   | 115.2(3)                                      | /                                             | 116.4(3)                                   | 116.7(2)                                   | 113.6(7)                                   | 115.3(2)                                   | 114.76(15)                                 | 114.64(10)                                 | 114.5(3)                                   |                                            |
|                                                           | $\theta_{N1-N2-C3-N4}^c$ (°)                 | 0.1(3)                                     | 2.5(6)                                        | /                                             | 0.14                                       | -1.61                                      | 1(1)                                       | -0.8(4)                                    | 1.50                                       | 0.9                                        | 0.37                                       |                                            |
|                                                           | $\theta_{C7-N1-N2-C3}^c$ (°)                 | -178.13                                    | -149.88                                       | /                                             | -179.24                                    | 177.57                                     | -179.70                                    | 170.14                                     | -170.73                                    | 178.89                                     | 177.27                                     |                                            |
|                                                           | $\theta_{C8-C7-N1-N2}^c$ (°)                 | 50.6                                       | -39.65                                        | /                                             | -60.22                                     | -69.08                                     | -2.92                                      | -7.54                                      | -37.66                                     | -12.98                                     | 44.91                                      |                                            |
|                                                           | $\delta_{\text{triazinyl-(C3)Ph}}^d$ (°)     | 9.1                                        | 12.71                                         | /                                             | 1.61                                       | 2.80                                       | 2.9                                        | 30.2                                       | 17.14                                      | 6.58                                       | 15.10                                      |                                            |
|                                                           | $\delta_{\text{triazinyl-fused ring}}^d$ (°) | 5.44                                       | 15.98                                         | /                                             | 1.58                                       | 7.20                                       | 1.17                                       | 3.08                                       | 13.42                                      | 8.12                                       | 5.38                                       |                                            |
| $\delta_{\text{plan(N1, N2, C3)-plan(N4, C5, C6)}}^d$ (°) | 3.71                                         | 9.03                                       | /                                             | 1.01                                          | 1.18                                       | 1.34                                       | 2.02                                       | 7.72                                       | 4.90                                       | 4.96                                       |                                            |                                            |
| $\delta_{(N1)Ph\text{-fused ring}}$                       | 57.36                                        | 57.30                                      | /                                             | 58.43                                         | 69.24                                      | 2.35                                       | 16.39                                      | 49.58                                      | 6.39                                       | 51.22                                      |                                            |                                            |
| Voltammetry                                               | $E_{1/2}^{0/+1}$ (V)                         | 0.28                                       | 0.09                                          | 0.06                                          | 0.12 <sup>e</sup>                          | 0.20                                       | 0.31                                       | 0.33                                       | 0.42                                       | 0.41 <sup>e</sup>                          | 0.42 <sup>e</sup>                          |                                            |
|                                                           | $E_{1/2}^{-1/0}$ (V)                         | -0.92                                      | -0.66                                         | -0.72                                         | -0.89 <sup>e</sup>                         | -0.86                                      | -0.87                                      | -0.80                                      | -0.77                                      | -0.74 <sup>e</sup>                         | -0.81 <sup>e</sup>                         |                                            |
|                                                           | $E_{\text{gap}}^{\text{Expt}}$ (V)           | 1.20                                       | 0.75                                          | 0.78                                          | 1.01 <sup>e</sup>                          | 1.06                                       | 1.18                                       | 1.13                                       | 1.19                                       | 1.15                                       | 1.23                                       |                                            |
|                                                           | Solvent <sup>f</sup>                         | CH <sub>2</sub> Cl <sub>2</sub>            | CH <sub>2</sub> Cl <sub>2</sub>               | CH <sub>2</sub> Cl <sub>2</sub>               | CH <sub>2</sub> Cl <sub>2</sub>            | CH <sub>2</sub> Cl <sub>2</sub>            | CH <sub>2</sub> Cl <sub>2</sub>            | CH <sub>2</sub> Cl <sub>2</sub>            | CH <sub>2</sub> Cl <sub>2</sub>            | CH <sub>2</sub> Cl <sub>2</sub>            | CH <sub>2</sub> Cl <sub>2</sub>            | CH <sub>2</sub> Cl <sub>2</sub>            |
|                                                           | Electrolyte <sup>f</sup>                     | <i>n</i> -Bu <sub>4</sub> NPF <sub>6</sub> | <i>n</i> -Bu <sub>4</sub> NPF <sub>6</sub>    | <i>n</i> -Bu <sub>4</sub> NPF <sub>6</sub>    | <i>n</i> -Bu <sub>4</sub> NPF <sub>6</sub> | <i>n</i> -Bu <sub>4</sub> NPF <sub>6</sub> | <i>n</i> -Bu <sub>4</sub> NPF <sub>6</sub> | <i>n</i> -Bu <sub>4</sub> NPF <sub>6</sub> | <i>n</i> -Bu <sub>4</sub> NPF <sub>6</sub> | <i>n</i> -Bu <sub>4</sub> NPF <sub>6</sub> | <i>n</i> -Bu <sub>4</sub> NPF <sub>6</sub> | <i>n</i> -Bu <sub>4</sub> NPF <sub>6</sub> |
| Stability                                                 | TGA or DSC (°C)                              | 269 <sup>S5</sup><br>(DSC)                 | 215 <sup>g</sup><br>314 <sup>h</sup><br>(TGA) | 217 <sup>g</sup><br>314 <sup>h</sup><br>(TGA) | 250 <sup>g, S8</sup><br>(TGA)              | /                                          | /                                          | /                                          | 288<br>(DSC)                               | /                                          | /                                          |                                            |

<sup>a</sup> Bond distance. <sup>b</sup> Bond angle. <sup>c</sup> Twist angle. <sup>d</sup> The dihedral angle between the two planes. Plane of triazinyl is defined by N1, N2, N3. <sup>e</sup> Calculated from the literatures. <sup>f</sup> The solvent and supporting electrolyte used in the electrochemical measurements. <sup>g</sup> 1% Mass lost. <sup>h</sup> 5% Mass lost.

**Table S2.** The properties related to redox of Blatter radical and its derivatives. For labels of the concerned atoms and rings, see Fig. S2.

| Ref                                | Blatter                          |                                  |                                  |                                  | 2                                | 3                                | 4                                |                                  |                                  | 5                                | 6                                |                                  | 7                                | 8                                |
|------------------------------------|----------------------------------|----------------------------------|----------------------------------|----------------------------------|----------------------------------|----------------------------------|----------------------------------|----------------------------------|----------------------------------|----------------------------------|----------------------------------|----------------------------------|----------------------------------|----------------------------------|
|                                    | S9                               | S10                              | S11                              | S12                              | S2                               | S3                               | S4                               | S13                              | S14                              | S4                               | S5                               | S9                               | S6                               | S7                               |
| $E_{1/2}^{0/+1}$ (V)               | 0.288                            | 0.28                             | 0.28                             | 0.103                            | 0.12 <sup>a</sup>                | 0.20                             | 0.31                             | 0.31                             | 0.31                             | 0.33                             | 0.36                             | 0.476                            | 0.41 <sup>a</sup>                | 0.42 <sup>a</sup>                |
| $E_{1/2}^{-1/0}$ (V)               | -0.864                           | -0.92                            | -0.92                            | -0.96                            | -0.89 <sup>a</sup>               | -0.86                            | -0.89                            | -0.86                            | -0.87                            | -0.80                            | -0.84                            | -0.7                             | -0.74 <sup>a</sup>               | -0.81 <sup>a</sup>               |
| $E_{\text{gap}}^{\text{Expt}}$ (V) | 1.152                            | 1.20                             | 1.20                             | 1.06                             | 1.01 <sup>a</sup>                | 1.06                             | 1.20                             | 1.16                             | 1.18                             | 1.13                             | 1.20                             | 1.176                            | 1.15                             | 1.23                             |
| Solvent <sup>b</sup>               | CH <sub>2</sub> Cl <sub>2</sub>  |
| Electrolyte <sup>b</sup>           | Bu <sub>4</sub> NPF <sub>6</sub> |

<sup>a</sup> Calculated from the literatures. <sup>b</sup> The solvent and supporting electrolyte used in the electrochemical measurements.

### 3. General Procedures and Materials

Anhydrous toluene and triethylamine were freshly distilled over sodium benzophenone and  $\text{CaH}_2$ , respectively, under argon. Anhydrous tetrahydrofuran (THF) was obtained from solvent purification system (Inert, PS-MD-5). Per-deuterated solvents for NMR spectroscopy were obtained from Cambridge Isotope Laboratories and used as received. All other commercially available chemicals were obtained from either Innochem, Bidepharmor or Energy Chemical and used without further purification, unless indicated otherwise.

Column chromatography (0–20 psig pressure) was performed by using silica gel. Analytical TLC plates were carried out on 0.25 mm MilliporeSigma silica plates (60F-254), using UV light as the visualizing agent. Deactivated analytical TLC plates as well as deactivated silica gel were obtained by treating with 3% triethylamine in hexane and then dried under vacuum before use. In some cases, recycle preparative HPLC was also tried for chemical purifications, in which the purifications were performed on a LaboACE LC-5060 Plus II (Japan Analytical Industry Co., Ltd., Japan) equipped with high-throughput separation GPC chromatographic column (JAIGEL-1HR and JAIGEL-2HR) and ultraviolet-visible detector (UV-VIS 4ch 800LA). UV–Vis–NIR spectra were recorded on a Shimadzu UV-3600 (Shimadzu, Japan) spectrophotometer. Cyclic voltammetry (CV) and differential pulse voltammetry (DPV) experiments were carried out using an electrochemical workstation from Chenhua Instruments Co. (Shanghai, China), employing a glass carbon electrode (4 mm in diameter) as the working electrode, a platinum wire as counter electrode and an Ag electrode as the reference electrode. X-band EPR spectra were recorded on a Bruker E500 spectrometer equipped with an Oxford ESR900 liquid helium cryostat and ITC-503 temperature controller. Thermal stabilities were tested using a STA 449 F5 Jupiter® (Netzsch, GER) TGA instrument under  $\text{N}_2$  atmosphere. NMR spectra were recorded on JEOL Delta spectrometers ( $^1\text{H}$ , 400 and 600 MHz) using chloroform-*d* ( $\text{CDCl}_3$ ) or dimethyl sulfoxide-*d*<sub>6</sub> ( $(\text{CD}_3)_2\text{SO}$ ) as the solvent. The chemical shift references were as follows: ( $^1\text{H}$ ) chloroform-*d*, 7.26 ppm (chloroform), ( $^{13}\text{C}$ ) chloroform-*d*, 77.00 ppm (chloroform-*d*); ( $^1\text{H}$ ) dimethyl sulfoxide-*d*<sub>6</sub>, 2.50 ppm (dimethyl sulfoxide-*d*<sub>5</sub>), ( $^{13}\text{C}$ ) dimethyl sulfoxide-*d*<sub>6</sub>, 39.52 ppm (dimethyl sulfoxide-*d*<sub>5</sub>). Mass spectra (ESI-HRMS) were acquired on a GCT spectrometer (Bruker Daltonics Inc).

## 4. Synthesis of Radicals 1 and 1-*t*Bu

### 4.1 Synthesis of Radical 1

Scheme S1. Synthesis Route to 1.

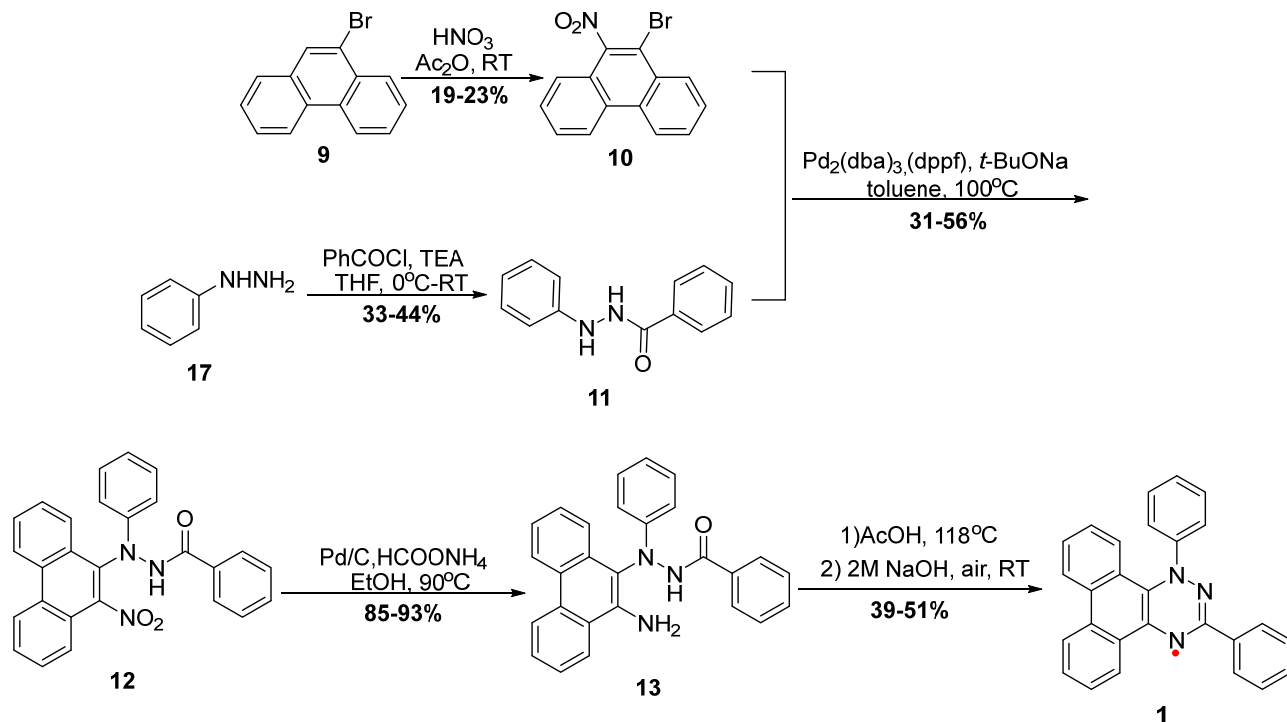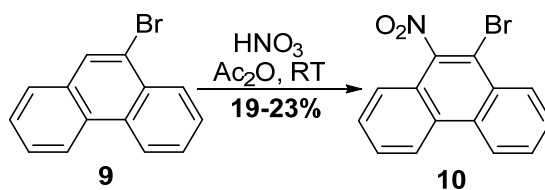

Table S3. Summary for preparation of 10.

| Run | ID      | 9<br>(g/mmol/equiv) | 68 % HNO <sub>3</sub><br>(mL/mmol/equiv) | Ac <sub>2</sub> O<br>mL | Product            |            |
|-----|---------|---------------------|------------------------------------------|-------------------------|--------------------|------------|
|     |         |                     |                                          |                         | 10                 |            |
|     |         |                     |                                          |                         | Amount/Yield (g/%) | TM Label   |
| 1   | GWJ4-78 | 10.05/39.1/1.0      | 5.0/76.1/1.9                             | 260.0                   | 2.35/20            | 4-P120-U-2 |
| 2   | GWJ4-97 | 25.01/97.3/1.0      | 9.5/144.6/1.5                            | 650.0                   | 6.76/23            | 4-P150-U-2 |
| 3   | GWJ5-35 | 50.13/195.0/1.0     | 19.0/289.1/1.5                           | 800.0                   | 11.04/19           | 5-P138-U-2 |
| 4   | GWJ6-13 | 100.05/389.1/1.0    | 40.0/608.6/1.6                           | 600.0                   | 23.30/20           | 6-P15-U-2  |

The compounds were prepared according to the procedure reported in the literature.<sup>S15</sup>

**GWJ4-97:** 9-Bromophenanthrene (25.01 g, 97.3 mmol, 1.0 equiv) was dissolved in acetic anhydride (500 mL). Concentrated nitric acid (68%, 9.5 mL, 144.6 mmol, 1.5 equiv) was diluted with acetic

anhydride (150 mL), and the resulting solution was added dropwise over 30 minutes to the solution of 9-bromophenanthrene under vigorous stirring. After complete addition, the mixture was stirred at room temperature for overnight. The mixture solvent was removed under reduced pressure. The residue was recrystallized from dichloromethane (300 mL) to afford compound **10** (3.57 g) as a yellow solid. The filtrate was then collected and the solvent was removed *in vacuo*. The resulting solid was further recrystallized from a mixture of chloroform and ethanol (128 mL, 1:1 v/v) to yield an additional amount of compound **10** (3.10 g). The total yield was 6.67 g, 23%.

**10**:  $R_f = 0.4$  (PE/DCM, 4:1, v/v).  $^1\text{H NMR}$  (600 MHz, 298 K,  $\text{CDCl}_3$ ):  $\delta = 8.71\text{--}8.73$  (m, 2H), 8.46 (d,  $J = 9.4$  Hz, 1H), 7.78–7.84 (m, 3H), 7.71 (t,  $J = 7.9$  Hz, 1H), 7.66 (d,  $J = 8.2$  Hz, 1H). (*Lit.*<sup>S15</sup>  $^1\text{H NMR}$  (400 MHz,  $\text{CDCl}_3$ )  $\delta = 8.64\text{--}8.71$  (m, 2H), 8.45–8.40 (m, 1H), 7.73–7.83 (m, 3H), 7.61–7.71 (m, 2H))

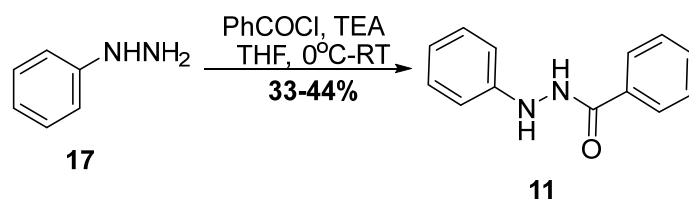

**Table S4.** Summary for preparation of **11**.

| Run | ID       | 17<br>(g/mmol/equiv) | PhCOCl<br>(mL/mmol/equiv) | Anhydrous<br>Et <sub>3</sub> N<br>(mL/mmol/equiv) | THF<br>mL | Product            |            |
|-----|----------|----------------------|---------------------------|---------------------------------------------------|-----------|--------------------|------------|
|     |          |                      |                           |                                                   |           | 11                 |            |
|     |          |                      |                           |                                                   |           | Amount/Yield (g/%) | TM Label   |
| 1   | GWJ4-28  | 4.45/41.1/1.0        | 4.8/41.3/1.0              | 5.7/41.0/1.0                                      | 50.0      | 3.57/41            | 4-P37-U-4  |
| 2   | GWJ4-105 | 5.01/46.3/1.0        | 5.4/46.5/1.0              | 7.3/52.5/1.1                                      | 50.0      | 3.21/33            | 3-P161-U-4 |
| 3   | GWJ5-39  | 20.03/185.2/1.0      | 21.4/184.2/1.0            | 29.0/208.6/1.1                                    | 225.0     | 17.23/44           | 5-P42-U-4  |
| 4   | GWJ-8-41 | 25.02/231.4/1.0      | 27.0/232.4/1.0            | 36.0/259.0/1.1                                    | 250.0     | 18.06/37           | GWJ-8-57   |

The compounds were prepared according to the procedure reported in the literature.<sup>S16</sup>

**GWJ4-28:** Triethylamine (5.7 mL, 41.0 mmol, 1.0 equiv) was added to a solution of phenylhydrazine **17** (4.45 g, 41.1 mmol, 1.0 equiv) in anhydrous THF (50 ml) at 0 °C under Ar. The resulting mixture was stirred at 0 °C for 10 min and benzoyl chloride (4.8 mL, 41.3 mmol, 1.0 equiv) was added dropwise. The mixture was then left to stir for 18 hours while allowing the reaction mixture to slowly warm to rt. Water (20 ml) was added to quench the reaction followed by the addition of a saturated aqueous solution of sodium bicarbonate (20 ml). The phases were separated and the water phase was extracted with ethyl acetate (3 × 20 ml). The combined organic phase was washed with a saturated solution of sodium bicarbonate (2 × 20 ml), dried over sodium sulfate, filtered and the solvent was removed *in vacuo*. The resulting solid was recrystallized from ethanol (35 mL) to afford compound **11** (3.57 g, 41% yield) as a white solid.

**11**:  $R_f = 0.2$  (DCM).  $^1\text{H NMR}$  (400 MHz, 298 K,  $(\text{CD}_3)_2\text{SO}$ ):  $\delta = 10.34$  (s, 1H), 7.91–7.92 (m, 3H), 7.58 (t,  $J = 6.8$  Hz, 1H), 7.50 (t,  $J = 7.2$  Hz, 2H), 7.15 (t,  $J = 7.2$  Hz, 2H), 6.78 (d,  $J = 7.5$  Hz, 2H), 6.72 (t,  $J = 6.8$  Hz, 1H). (*Lit.*<sup>S16</sup>  $^1\text{H NMR}$  (400 MHz,  $\text{CDCl}_3$ )  $\delta = 7.85\text{--}7.87$  (m, 3H), 7.57–7.60 (m, 1H), 7.48–7.52 (m, 2H), 7.25–7.29 (m, 3H), 6.92–6.96 (m, 3H))

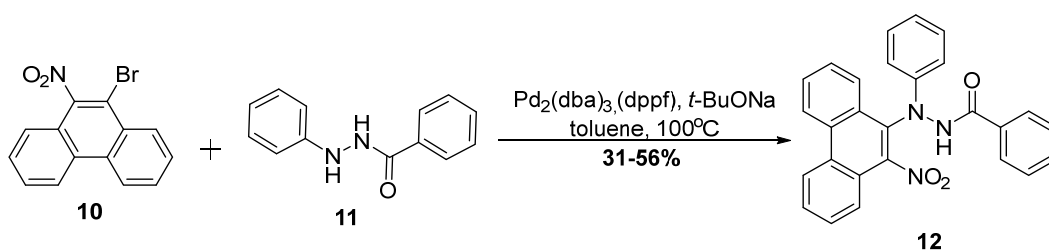

**Table S5.** Summary for preparation of **12**.

| Run | ID       | <b>10</b><br>(g/mmol/equiv) | <b>11</b><br>(g/mmol/equiv) | Pd <sub>2</sub> (dba) <sub>3</sub><br>(g/mmol/equiv) | dppf<br>(g/mmol/equiv) | <i>t</i> -BuONa<br>(g/mmol/equiv) | Anhydrous<br>toluene<br>(mL) | Product            |            |
|-----|----------|-----------------------------|-----------------------------|------------------------------------------------------|------------------------|-----------------------------------|------------------------------|--------------------|------------|
|     |          |                             |                             |                                                      |                        |                                   |                              | <b>12</b>          |            |
|     |          |                             |                             |                                                      |                        |                                   |                              | Amount/Yield (g/%) | TM Label   |
| 1   | GWJ4-92  | 1.02/3.4/1.0                | 1.41/6.6/1.9                | 0.85/0.9/0.3                                         | 0.71/1.3/0.4           | 0.48/5.0/1.5                      | 3.0                          | 0.46/31            | 4-P144-U-5 |
| 2   | GWJ5-42  | 8.06/26.7/1.0               | 11.28/53.1/2.0              | 6.66/7.3/0.3                                         | 6.06/10.9/0.4          | 3.74/38.9/1.5                     | 92.0                         | 4.67/40            | 5-P45-U-5  |
| 3   | GWJ5-147 | 4.04/13.4/1.0               | 5.64/26.6/2.0               | 3.33/3.6/0.3                                         | 3.03/5.5/0.4           | 1.87/19.5/1.5                     | 46.0                         | 2.64/45            | 5-P147-U-5 |
| 4   | GWJ8-45  | 5.01/16.6/1.0               | 4.78/22.5/1.4               | 0.82/0.9/0.1                                         | 0.72/1.3/0.1           | 2.74/28.5/1.7                     | 250.0                        | 4.01/56            | 8-P59-U-5  |

**GWJ5-42**<sup>S17</sup>: Pd<sub>2</sub>(dba)<sub>3</sub> (6.66 g, 0.3 mmol, 0.27 equiv), 1,1'-bis(diphenylphosphino)ferrocene (dppf) (6.06 g, 10.9 mmol, 0.4 equiv), compound **10** (8.06 g, 26.7 mmol, 1.0 equiv), compound **11** (11.28 g, 53.1 mmol, 2.0 equiv), and *t*-BuONa (3.74 g, 38.9 mmol, 1.5 equiv) were placed in a 250 mL two-necked round-bottom flask equipped a condenser tube. The flask was purged with argon, followed by the addition of freshly distilled anhydrous toluene (92 mL). The resulting mixture was degassed using the freeze-pump-thaw method for three cycles. It was then stirred at 100 °C for 12 hours. After completion of the reaction, the mixture was cooled to the room temperature and concentrated under reduced pressure. The crude residue was purified by flash column chromatography on silica gel, using petroleum ether/ethyl acetate (20:1, v/v) as the eluent, to afford compound **12** (4.67 g, 40%) as a brown solid.

**12**: *R*<sub>f</sub> = 0.15 (PE/EA, 5:1, v/v). M.P.: 167.5–169.2 °C (under air). <sup>1</sup>H NMR (600 MHz, 298 K, (CD<sub>3</sub>)<sub>2</sub>SO): δ = 11.24 (s, 1H), 9.03 (d, *J* = 8.4 Hz, 1H), 8.99 (d, *J* = 8.4 Hz, 1H), 8.30 (d, *J* = 8.2 Hz, 1H), 7.81–7.89 (m, 5H), 7.71 (d, *J* = 8.2 Hz, 1H), 7.66 (t, *J* = 7.2 Hz, 1H), 7.58 (t, *J* = 6.9 Hz, 1H), 7.50 (t, *J* = 7.2 Hz, 2H), 7.23 (t, *J* = 7.3 Hz, 2H), 6.90 (t, *J* = 7.1 Hz, 1H), 6.72 (d, *J* = 5.8 Hz, 2H). <sup>13</sup>C NMR (150 MHz, 298 K, (CD<sub>3</sub>)<sub>2</sub>SO): δ = 116.4, 146.2, 132.2, 132.0, 131.3, 130.3, 129.6, 129.2, 129.1, 129.0, 128.9, 128.4, 127.9, 127.7, 127.5, 127.1, 123.7, 123.7, 122.9, 121.8, 120.7, 114.5. HRMS (ESI-TOF), [M + H]<sup>1+</sup>: Calcd C<sub>27</sub>H<sub>20</sub>N<sub>3</sub>O<sub>3</sub> 434.1505, found 434.1500 (-1.15 ppm).

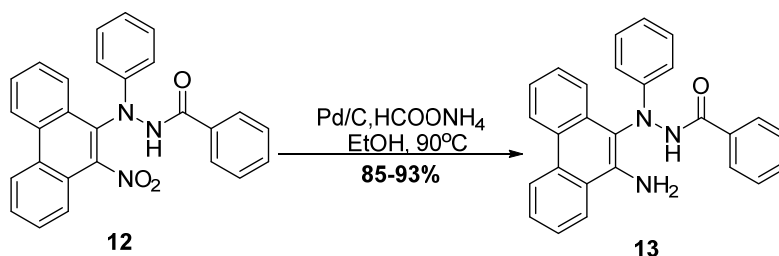

**Table S6.** Summary for preparation of **13**.

| Run | ID | <b>12</b><br>(g/mmol/equiv) | 10% Pd/C<br>(g/mmol/equiv) | HCOONH <sub>4</sub><br>(g/mmol/equiv) | Anhydrous<br>EtOH<br>(mL) | Product            |          |
|-----|----|-----------------------------|----------------------------|---------------------------------------|---------------------------|--------------------|----------|
|     |    |                             |                            |                                       |                           | <b>13</b>          |          |
|     |    |                             |                            |                                       |                           | Amount/Yield (g/%) | TM Label |

|   |          |              |              |                  |      |         |            |
|---|----------|--------------|--------------|------------------|------|---------|------------|
| 1 | GWJ4-95  | 0.33/0.8/1.0 | 0.30/0.3/0.4 | 2.81/44.6/55.8   | 25.0 | 0.30/93 | 4-P147-U-6 |
| 2 | GWJ5-148 | 2.61/6.0/1.0 | 1.0/0.9/0.16 | 18.92/300.3/50.0 | 80.0 | 2.06/85 | 5-P148-U-6 |

**GWJ4-95**<sup>S18</sup>: Compound **12** (0.33 g, 0.8 mmol, 1.0 equiv), HCO<sub>2</sub>NH<sub>4</sub> (2.81 g, 44.6 mmol, 55.8 equiv) and 10% Pd/C (0.30 g, 0.3 mmol, 0.4 equiv) were placed in a 50 mL two-necked round-bottom flask equipped a condenser tube. The flask was evacuated and backfilled with argon for three times, followed by the addition of degassed absolute EtOH (25 mL). The resulting mixture was stirred at 90 °C for 3 hours. When the starting material was completely consumed the reaction mixture was allowed to cool down to the room temperature and 100 mL of water was then added. The mixture was extracted three times with 50 mL of DCM, the organic phases were combined, dried over sodium sulfate, filtered and the solvent was removed under reduced pressure. The crude residue was purified by flash column chromatography on silica gel, using petroleum ether/ethyl acetate (5:1, v/v) as the eluent, to afford the compound **13** (0.30 g, 93%) as a white solid.

**13**: *R<sub>f</sub>* = 0.5 (PE/DCM, 4:1, v/v). M.P.: 198.1–199.3 °C (under air). <sup>1</sup>H NMR (400 MHz, 298 K, (CD<sub>3</sub>)<sub>2</sub>SO): δ = 11.10 (s, 1H), 8.81 (d, *J* = 7.8 Hz, 1H), 8.67 (d, *J* = 8.0 Hz, 1H), 8.34 (d, *J* = 8.1 Hz, 1H), 7.96–7.98 (m, 2H), 7.71–7.75 (m, 2H), 7.67 (t, *J* = 7.2 Hz, 1H), 7.60 (t, *J* = 7.3 Hz, 1H), 7.51 (t, *J* = 7.2 Hz, 2H), 7.42 (t, *J* = 7.1 Hz, 1H), 7.34 (t, *J* = 7.7 Hz, 1H), 7.14 (t, *J* = 7.6 Hz, 2H), 6.72 (m, 3H), 6.54 (d, *J* = 7.9 Hz, 2H). <sup>13</sup>C NMR (100 MHz, 298 K, (CD<sub>3</sub>)<sub>2</sub>SO): δ = 146.9, 132.2, 132.1, 131.0, 130.5, 129.2, 128.5, 127.9, 127.5, 126.9, 126.3, 125.0, 123.7, 123.2, 123.0, 122.2, 118.2, 114.2, 111.6. HRMS (ESI–TOF), [M + H]<sup>1+</sup>: Calcd C<sub>27</sub>H<sub>22</sub>N<sub>3</sub>O 404.1763, found 404.1762 (-0.25 ppm).

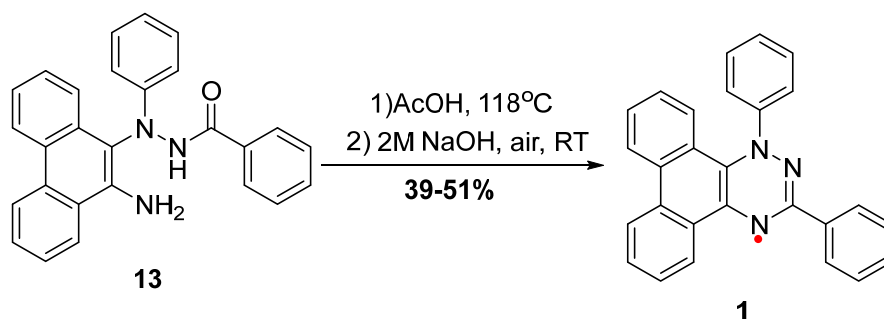

**Table S7.** Summary for preparation of **1**.

| Run | ID        | <b>13</b><br>(mg/mmol/equiv) | AcOH<br>(mL) | Product             |            |
|-----|-----------|------------------------------|--------------|---------------------|------------|
|     |           |                              |              | <b>1</b>            |            |
|     |           |                              |              | Amount/Yield (mg/%) | TM Label   |
| 1   | GWJ5-56   | 200.12/0.5/1.0               | 4.0          | 75.21/39            | 5-P61-U-7  |
| 2   | GWJ5-P146 | 100.02/0.2/1.0               | 2.0          | 38.86/51            | 5-P146-U-7 |
| 3   | GWJ8-51   | 1000.02/2.5/1.0              | 8.0          | 417.12/43           | 8-P66-U-7  |
| 4   | GWJ9-44   | 200.01/0.5/1.0               | 4.0          | 84.58/44            | 9-P62-U-7  |

**GWJ5-56**<sup>S19</sup>: Compound **13** (200.12 mg, 0.5 mmol, 1.0 equiv) was dispersed in acetic acid (4.0 mL) under an argon atmosphere and heated to reflux (oil bath temperature: 118 °C) for 40 min, during which the mixture turned dark brown. After completion of the reaction, the mixture was allowed to cool down to room temperature. A solution of 2 M NaOH (150 mL) and ethanol (50 mL) was added directly. The resulting mixture was stirred under air for 4 h. The mixture was then extracted with

dichloromethane (3 × 50 mL). The combined organic layers were dried over sodium sulfate, filtered, and concentrated under reduced pressure. The residue was purified by the 3% Et<sub>3</sub>N deactivated silica gel flash column chromatography with a mixture of petroleum ether/dichloromethane (8:1, v/v) as the eluent, to afford compound **1** (75.21 mg, 39%) as dark brown solids.

The free radical **1** used for all the characterizations was purified further by recrystallization from ethyl acetate. **1**: *R<sub>f</sub>* = 0.4 (PE/DCM, 8:1, v/v, 3% deactivated silica plate). M.P.: 215.8 –216.2 °C (under Ar). HRMS (ESI–TOF), [M]<sup>1+</sup>: Calcd: C<sub>27</sub>H<sub>18</sub>N<sub>3</sub> 384.1501, found 384.1491 (-2.60 ppm). EPR (X-band, 9.42 GHz, toluene, label:3-P61-U-7) spin concentration 100%.

## 4.2 Synthesis of Radical 1-*t*Bu

**Scheme S2.** Synthesis Route to **1-*t*Bu**.

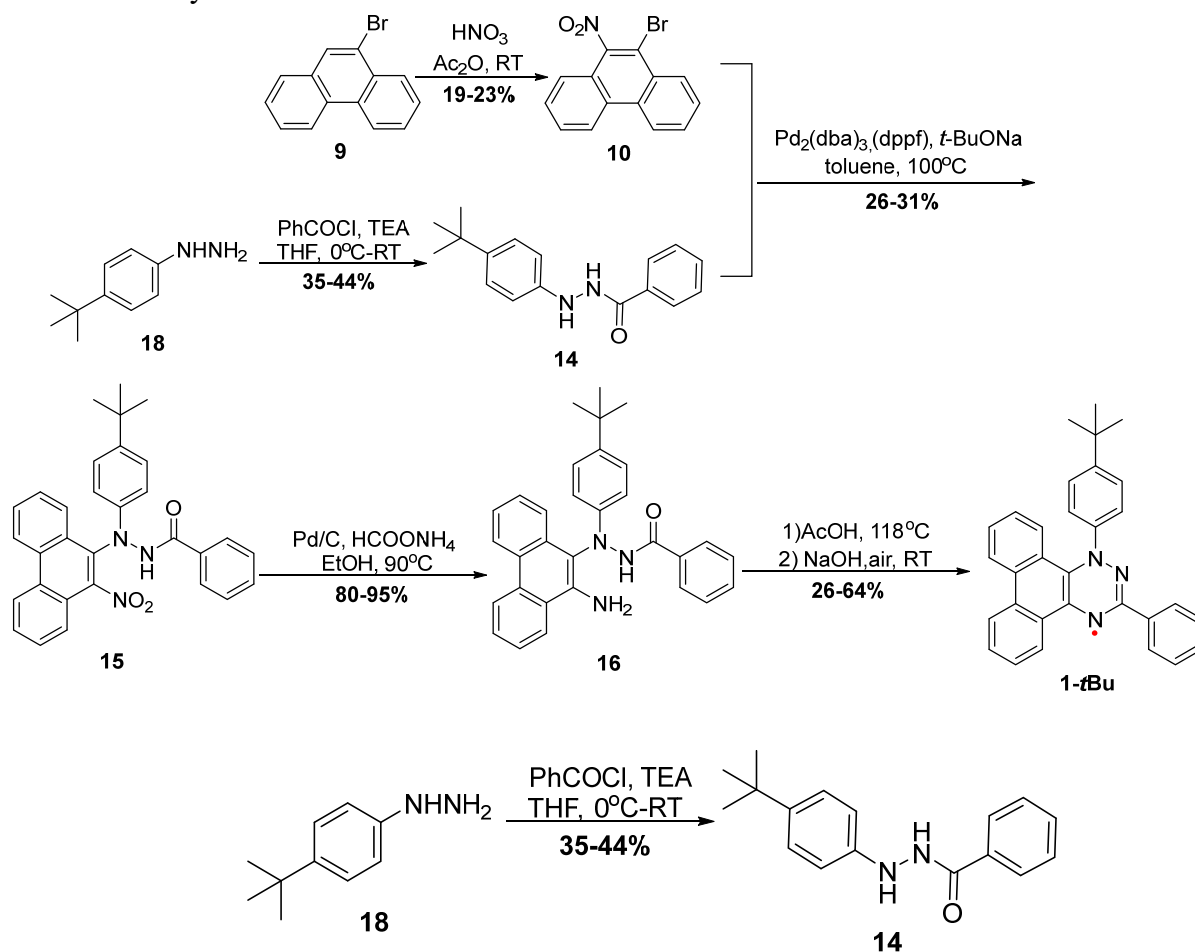

**Table S8.** Summary for preparation of **14**.

| Run | ID       | <b>18</b><br>(g/mmol/equiv) | PhCOCl<br>(mL/mmol/equiv) | Anhydrous<br>Et <sub>3</sub> N<br>(mL/mmol/equiv) | THF<br>mL | Product            |           |
|-----|----------|-----------------------------|---------------------------|---------------------------------------------------|-----------|--------------------|-----------|
|     |          |                             |                           |                                                   |           | <b>14</b>          |           |
|     |          |                             |                           |                                                   |           | Amount/Yield (g/%) | TM Label  |
| 1   | GWJ5-73  | 0.1/0.6/1.0                 | 0.07/0.6/1.0              | 0.24/1.72/2.9                                     | 5.0       | 0.067/42           | 5-P83-O-2 |
| 2   | GWJ6-P90 | 5.02/30.6/1.0               | 3.6/30.6/1.0              | 10.4/74.6/2.4                                     | 50.0      | 3.59/44            | 4-P37-O-2 |
| 3   | GWJ8-42  | 25.03/152.4/1.0             | 17.7/152.4/1.0            | 62.0/444.8/2.9                                    | 250.0     | 14.49/35           | 8-P56-O-2 |

The compounds were prepared according to the procedure reported in the literature.<sup>S20</sup>

**GWJ6–P90:** Triethylamine (10.4 mL, 74.6 mmol, 2.4 equiv) was added to a solution of compound **18** (5.02 g, 30.6 mmol, 1.0 equiv) in anhydrous THF (50 ml) at 0 °C under Ar. The resulting mixture was stirred at 0 °C for 10 min and benzoyl chloride (3.6 mL, 30.6 mmol, 1.0 equiv) was added dropwise. The mixture was stirred for 18 h while allowing the reaction mixture to slowly warm to the room temperature. Water (40 ml) was added to quench the reaction, followed by the addition of a saturated aqueous solution of sodium bicarbonate (40 ml). The phases were separated and the water phase was extracted with ethyl acetate (3 × 40 ml). The combined organic phase was washed with a saturated solution of sodium bicarbonate (2 × 40 ml), dried over sodium sulfate, filtered and the solvent was removed *in vacuo*. The crude residue was purified by flash column chromatography on silica gel, using petroleum dichloromethane/ethyl acetate (10:1, v/v) as the eluent, to afford compound **14** (3.59 g, 44% yield) as a white solid.

**14:**  $R_f = 0.4$  (DCM).  $^1\text{H NMR}$  (600 MHz, 298 K,  $(\text{CD}_3)_2\text{SO}$ ):  $\delta = 10.34$  (s, 1H), 7.90 (d,  $J = 7.5$  Hz, 2H), 7.73 (s, 1H), 7.57 (t,  $J = 7.4$  Hz, 1H), 7.50 (t,  $J = 7.7$  Hz, 2H), 7.17 (d,  $J = 8.5$  Hz, 2H), 6.73 (d,  $J = 8.6$  Hz, 2H), 1.23 (s, 9H). (*Lit.*<sup>S20</sup>  $^1\text{H NMR}$  (400 MHz,  $\text{CDCl}_3$ )  $\delta = 10.36$  (d,  $J = 3.0$  Hz, 1H), 7.91 (d,  $J = 7.4$  Hz, 2H), 7.76 (d,  $J = 3.0$  Hz, 1H), 7.57 (d,  $J = 7.2$  Hz, 1H), 7.50 (t,  $J = 7.5$  Hz, 2H), 7.17 (d,  $J = 8.5$  Hz, 2H), 6.72 (d,  $J = 8.5$  Hz, 2H), 1.23 (s, 9H).

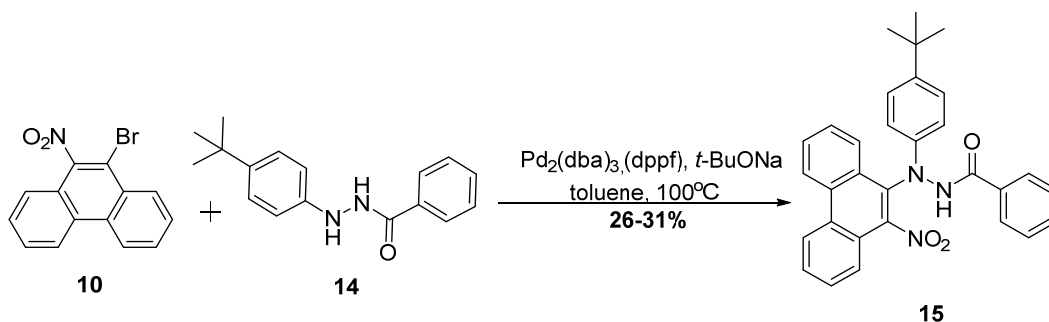

**Table S9.** Summary for preparation of **15**.

| Run | ID        | <b>10</b><br>(g/mmol/equiv) | <b>14</b><br>(g/mmol/equiv) | $\text{Pd}_2(\text{dba})_3$<br>(g/mmol/equiv) | dppf<br>(g/mmol/equiv) | <i>t</i> -BuONa<br>(g/mmol/equiv) | Anhydrous<br>toluene<br>(mL) | Product            |            |
|-----|-----------|-----------------------------|-----------------------------|-----------------------------------------------|------------------------|-----------------------------------|------------------------------|--------------------|------------|
|     |           |                             |                             |                                               |                        |                                   |                              | <b>15</b>          |            |
|     |           |                             |                             |                                               |                        |                                   |                              | Amount/Yield (g/%) | TM Label   |
| 1   | GWJ5-P114 | 0.50/1.7/1.0                | 0.89/3.3/1.9                | 0.42/0.5/0.3                                  | 0.39/0.7/0.4           | 0.24/2.5/1.5                      | 5.0                          | 0.26/31%           | 5–P114–O–5 |
| 2   | GWJ5-P116 | 2.02/6.7/1.0                | 3.56/13.3/2.0               | 1.71/1.9/0.3                                  | 1.55/2.8/0.4           | 0.96/10.0/1.5                     | 20.0                         | 1.02/31            | 5–P116–O–5 |
| 3   | GWJ6–P92  | 2.46/8.1/1.0                | 3.59/13.4/1.7               | 0.58/0.6/0.07                                 | 0.70/1.3/0.2           | 1.31/13.6/1.7                     | 30.0                         | 1.05/26            | 6–P92–O–5  |
| 4   | GWJ8–P58  | 8.03/26.6/1.0               | 10.77/40.13/1.5             | 0.55/0.6/0.02                                 | 0.67/1.2/0.05          | 4.32/45.0/1.7                     | 350.0                        | 3.96/30            | 8–P58–O–5  |

**GWJ5-P116**<sup>S17</sup>:  $\text{Pd}_2(\text{dba})_3$  (1.71 g, 1.9 mmol, 0.3 equiv), 1,1'-bis(diphenylphosphino)ferrocene (dppf) (1.55 g, 2.8 mmol, 0.4 equiv), compound **10** (2.02 g, 6.7 mmol, 1.0 equiv), compound **14** (3.56 g, 13.3 mmol, 2.0 equiv), and *t*-BuONa (0.96 g, 10.0 mmol, 1.5 equiv) were placed in a 50 mL two-necked round-bottom flask equipped a condenser tube. The flask was purged with argon, followed by the addition of freshly distilled anhydrous toluene (20 mL). The resulting mixture was degassed using the freeze–pump–thaw method for three cycles. It was then stirred at 100 °C for 12 hours. After completion of the reaction, the mixture was cooled to room temperature and concentrated under reduced pressure. The crude residue was purified by flash column chromatography on silica gel, using petroleum ether/ethyl acetate (20:1, v/v) as the eluent, to afford compound **15** (1.02 g, 31%) as brown

solids.

**15**:  $R_f = 0.6$  (PE/EA, 5:1, v/v). M.P.: 210.5–211.9 °C (under air).  $^1\text{H}$  NMR (600 MHz, 298 K,  $(\text{CD}_3)_2\text{SO}$ ):  $\delta = 11.16$  (s, 1H), 9.03 (d,  $J = 8.4$  Hz, 1H), 8.99 (d,  $J = 8.5$  Hz, 1H), 8.28 (d,  $J = 8.3$  Hz, 1H), 7.81–7.89 (m, 5H), 7.67 (t,  $J = 8.5$  Hz, 2H), 7.58 (t,  $J = 7.3$  Hz, 1H), 7.49 (t,  $J = 7.8$  Hz, 2H), 7.25 (d,  $J = 8.8$  Hz, 2H), 6.63 (t,  $J = 8.2$  Hz, 1H), 1.22 (s, 9H).  $^{13}\text{C}$  NMR (150 MHz, 298 K,  $(\text{CD}_3)_2\text{SO}$ ):  $\delta = 166.4, 143.9, 143.1, 132.3, 132.0, 131.3, 130.5, 129.6, 129.4, 129.1, 128.8, 128.5, 127.9, 127.8, 127.5, 127.3, 125.9, 123.8, 123.7, 122.9, 121.8, 114.5, 33.9, 31.3$ . HRMS (ESI–TOF),  $[\text{M} + \text{H}]^{1+}$ : Calcd  $\text{C}_{31}\text{H}_{28}\text{N}_3\text{O}_3$  490.2131, found 490.2130 (-0.20 ppm).

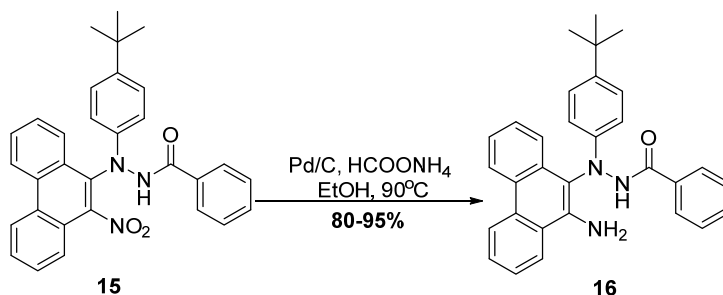

**Table S10.** Summary for preparation of **16**.

| Run | ID        | <b>15</b><br>(g/mmol/equiv) | 10% Pd/C<br>(g/mmol/equiv) | HCOONH <sub>4</sub><br>(g/mmol/equiv) | Anhydrous<br>EtOH<br>(mL) | Product            |            |
|-----|-----------|-----------------------------|----------------------------|---------------------------------------|---------------------------|--------------------|------------|
|     |           |                             |                            |                                       |                           | <b>16</b>          |            |
|     |           |                             |                            |                                       |                           | Amount/Yield (g/%) | TM Label   |
| 1   | GWJ5–P123 | 1.01/2.1/1.0                | 0.94/0.9/0.4               | 7.73/122.7/58.4                       | 25.0                      | 0.77/80            | 5–P123–O–6 |
| 2   | GWJ6–93   | 0.92/1.9/1.0                | 0.66/0.6/0.3               | 7.76/123.2/64.8                       | 25.0                      | 0.76/87            | 6–P93–O–6  |
| 3   | GWJ8–48   | 3.96/8.1/1.0                | 2.87/2.7/0.3               | 34.58/548.9/67.8                      | 250.0                     | 3.53/95            | 8–P63–O–6  |

**GWJ6-93**<sup>S18</sup>: Compound **15** (0.92 g, 1.9 mmol, 1.0 equiv), HCO<sub>2</sub>NH<sub>4</sub> (7.76 g, 123.2 mmol, 64.8 equiv) and 10% Pd/C (0.66 g, 0.6 mmol, 0.3 equiv) were placed in a 50 mL two-necked round-bottom flask equipped a condenser tube. The flask was evacuated and backfilled with argon for three times, followed by the addition of degassed absolute EtOH (25 mL). The resulting mixture was stirred at 90 °C for 3 hours. When the starting material was completely consumed, the reaction mixture was allowed to cool down to the room temperature and 100 mL of water was then added. The mixture was extracted three times with 50 mL of dichloromethane. The organic phases were combined, dried over sodium sulfate, filtered and the solvent was removed under reduced pressure. The crude residue was purified by flash column chromatography on silica gel, using petroleum ether/ethyl acetate (5:1, v/v) as the eluent, to afford the compound **16** (0.76 g, 87%) as a white solid.

**16**:  $R_f = 0.2$  (PE/EA, 5:1, v/v). M.P.: 148.3–150.1 °C (under air).  $^1\text{H}$  NMR (600 MHz, 298 K,  $(\text{CD}_3)_2\text{SO}$ ):  $\delta = 11.06$  (s, 1H), 8.80 (d,  $J = 8.3$  Hz, 1H), 8.67 (d,  $J = 8.3$  Hz, 1H), 8.34 (d,  $J = 8.2$  Hz, 1H), 7.96 (d,  $J = 8.3$  Hz, 1H), 7.79 (s, 1H), 7.72 (t,  $J = 7.1$  Hz, 1H), 7.66 (t,  $J = 7.2$  Hz, 1H), 7.60 (t,  $J = 7.5$  Hz, 1H), 7.51 (t,  $J = 7.8$  Hz, 2H), 7.43 (t,  $J = 7.02$  Hz, 1H), 7.33 (t,  $J = 7.5$  Hz, 1H), 7.16 (t,  $J = 10.1$  Hz, 2H), 6.72 (s, 2H), 6.46 (d,  $J = 9.0$  Hz, 2H), 1.20 (s, 9H).  $^{13}\text{C}$  NMR (150 MHz, 298 K,  $(\text{CD}_3)_2\text{SO}$ ):  $\delta = 144.5, 140.2, 132.4, 132.1, 131.3, 130.5, 128.5, 127.9, 127.5, 127.0, 126.3, 125.8, 125.0, 124.9, 123.7, 123.2, 123.0, 122.2, 114.4, 111.3, 33.5, 31.4$ . HRMS (ESI–TOF),  $[\text{M} + \text{H}]^{1+}$ : Calcd  $\text{C}_{31}\text{H}_{30}\text{N}_3\text{O}$  460.2389, found 460.2389 (0.00 ppm).

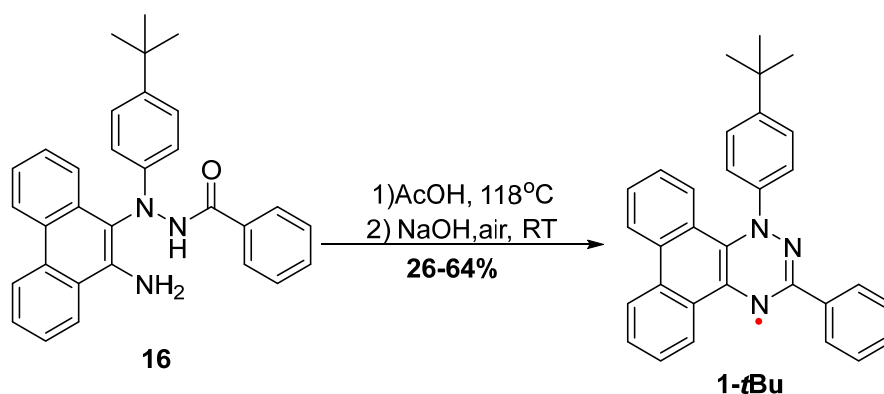

**Table S11.** Summary for preparation of **1-tBu**.

| Run | ID       | 16<br>(mg/mmol/equiv) | AcOH<br>(mL) | Product             |            |
|-----|----------|-----------------------|--------------|---------------------|------------|
|     |          |                       |              | 1-tBu               |            |
|     |          |                       |              | Amount/Yield (mg/%) | TM Label   |
| 1   | GWJ6-91  | 175.11/0.4/1.0        | 5.0          | 46.07/26            | 6-P91-O-7  |
| 2   | GWJ6-101 | 200.12/0.4/1.0        | 5.0          | 50.21/28            | 6-P101-O-7 |
| 3   | GWJ8-54  | 1000.03/2.2/1.0       | 8.0          | 617.23/64           | 8-P69-O-7  |
| 4   | GWJ9-44  | 200.37/0.44/1.0       | 4.0          | 60.32/31            | 9-P59-O-7  |

**GWJ6-101**<sup>S19</sup>: Compound **16** (200.12 mg, 0.4 mmol, 1.0 equiv) was dispersed in acetic acid (5.0 mL) under an argon atmosphere and heated to reflux (oil bath temperature: 118 °C) for 1 h, during which the mixture turned dark brown. After completion of the reaction, the mixture was allowed to cool down to room temperature. A solution of 2 M NaOH (100 mL) and ethanol (30 mL) was added. The resultant mixture was stirred under air for 10 minutes, then extracted with dichloromethane (3 × 50 mL). The combined organic layers were dried over sodium sulfate, filtered, and concentrated under reduced pressure. The residue was purified by the 3% Et<sub>3</sub>N deactivated silica gel flash column chromatography with a mixture of petroleum ether/dichloromethane (8:1, v/v) as the eluent, to afford compound **1-tBu** (50.21 mg, 28%) as dark brown solids.

The radical **1-tBu** used for all the characterization was purified further by the recycling preparative GPC. **1-tBu**:  $R_f = 0.7$  (PE/DCM, 8:1, v/v, 3% deactivated silica plate). M.P.: 215 °C (DSC, under Ar). HRMS (ESI-TOF),  $[M]^{1+}$ : Calcd: C<sub>31</sub>H<sub>26</sub>N<sub>3</sub> 440.2127, found 440.2124 (-0.681 ppm). EPR (X-band, 9.42 GHz, toluene, label: 6-P101-O-7) spin concentration 99%.

## 5. X-ray Crystallography

Crystals of **1** suitable for X-ray diffraction analysis were obtained by slow diffusion of *n*-pentane into ethyl acetate solutions at -20 °C. Black, block-shaped crystals were obtained.

X-ray single crystal diffraction was performed on XtalLAB Synergy X-ray diffractometer equipped with Cu K $\alpha$  radiation ( $\lambda = 1.54184$  Å) source. The crystal was kept at 100.15 K during data collection. Using Olex2<sup>S21</sup>, the structure was solved with the ShelXT<sup>S22</sup> structure solution program

using Direct Methods and refined with the ShelXL refinement package using Least Squares minimization. All non-hydrogen atoms were refined anisotropically. All hydrogen atoms were positioned by geometric idealization. The space group  $P2_1$  was determined based on intensity statistics and the lack of systematic absences. The obtained X-ray molecular structure is shown in Fig. 3, Fig. S3 and Fig. S4; the short intermolecular contacts between C-N and N-N were listed in Table S13; additional crystal and refinement information is summarized in Table S12.

**Table S12.** Crystal data and structure refinement for compound **1**.

|                                               |                                                               |
|-----------------------------------------------|---------------------------------------------------------------|
| Identification code                           | <b>1</b>                                                      |
| Empirical formula                             | $C_{27}H_{18}N_3$                                             |
| Formula weight                                | 384.44                                                        |
| Temperature/K                                 | 100.15                                                        |
| Crystal system                                | monoclinic                                                    |
| Space group                                   | $P2_1$                                                        |
| $a/\text{\AA}$                                | 12.5350(4)                                                    |
| $b/\text{\AA}$                                | 5.2858(2)                                                     |
| $c/\text{\AA}$                                | 14.2151(5)                                                    |
| $\alpha/^\circ$                               | 90                                                            |
| $\beta/^\circ$                                | 96.963(3)                                                     |
| $\gamma/^\circ$                               | 90                                                            |
| Volume/ $\text{\AA}^3$                        | 934.91(6)                                                     |
| Z                                             | 2                                                             |
| $\rho_{\text{calc}}/\text{cm}^3$              | 1.366                                                         |
| $\mu/\text{mm}^{-1}$                          | 0.633                                                         |
| F(000)                                        | 402.0                                                         |
| Crystal size/ $\text{mm}^3$                   | $0.5 \times 0.3 \times 0.15$                                  |
| Radiation                                     | $\text{CuK}\alpha$ ( $\lambda = 1.54184$ )                    |
| $2\theta$ range for data collection/ $^\circ$ | 7.104 to 152.768                                              |
| Index ranges                                  | $-15 \leq h \leq 15, -5 \leq k \leq 6, -12 \leq l \leq 17$    |
| Reflections collected                         | 6104                                                          |
| Independent reflections                       | 2923 [ $R_{\text{int}} = 0.1154, R_{\text{sigma}} = 0.1054$ ] |
| Data/restraints/parameters                    | 2923/1/271                                                    |
| Goodness-of-fit on $F^2$                      | 1.100                                                         |
| Final R indexes [ $I \geq 2\sigma(I)$ ]       | $R_1 = 0.0546, wR_2 = 0.1386$                                 |
| Final R indexes [all data]                    | $R_1 = 0.0834, wR_2 = 0.1495$                                 |
| Largest diff. peak/hole / $e \text{\AA}^{-3}$ | 0.21/-0.27                                                    |

(a)

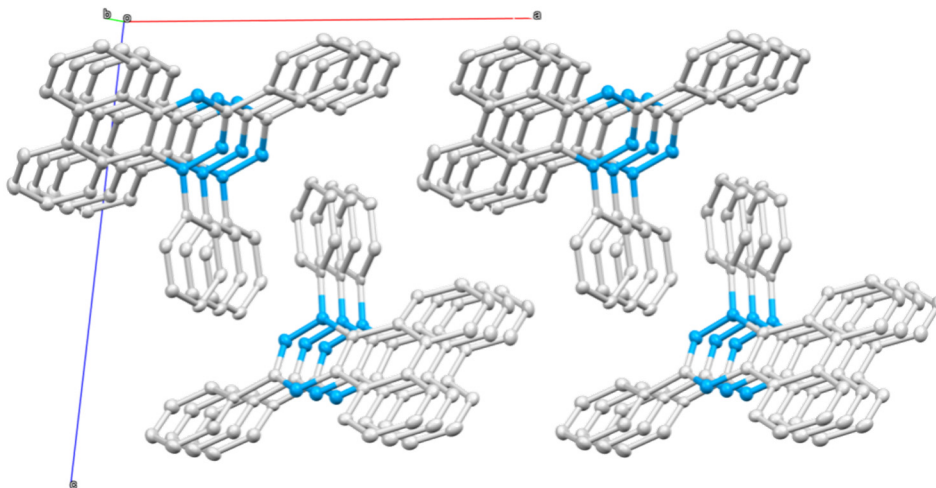

(b)

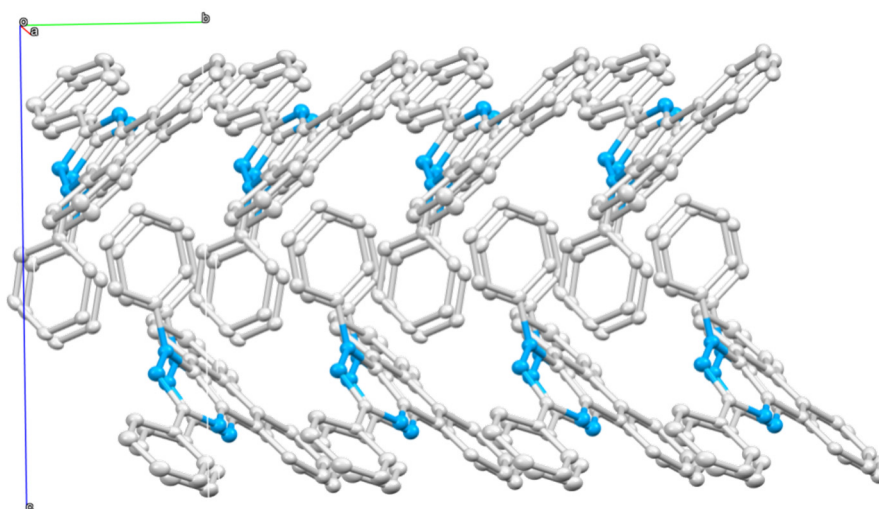

(c)

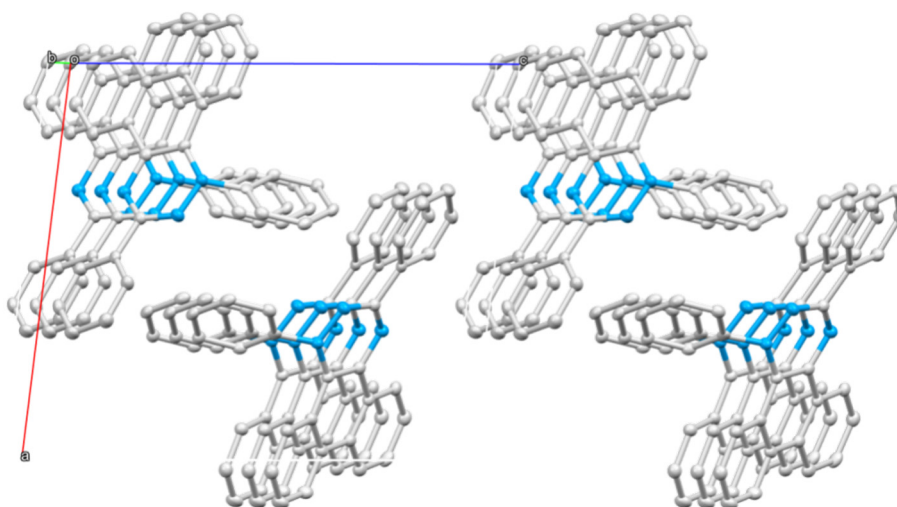

**Fig. S3.** X-ray crystallographic structure of **1**. (a) the crystal packing of **1** viewed along *a*-axis; (b) the crystal packing of **1** viewed along *b*-axis; (c) the crystal packing of **1** viewed along *c*-axis.

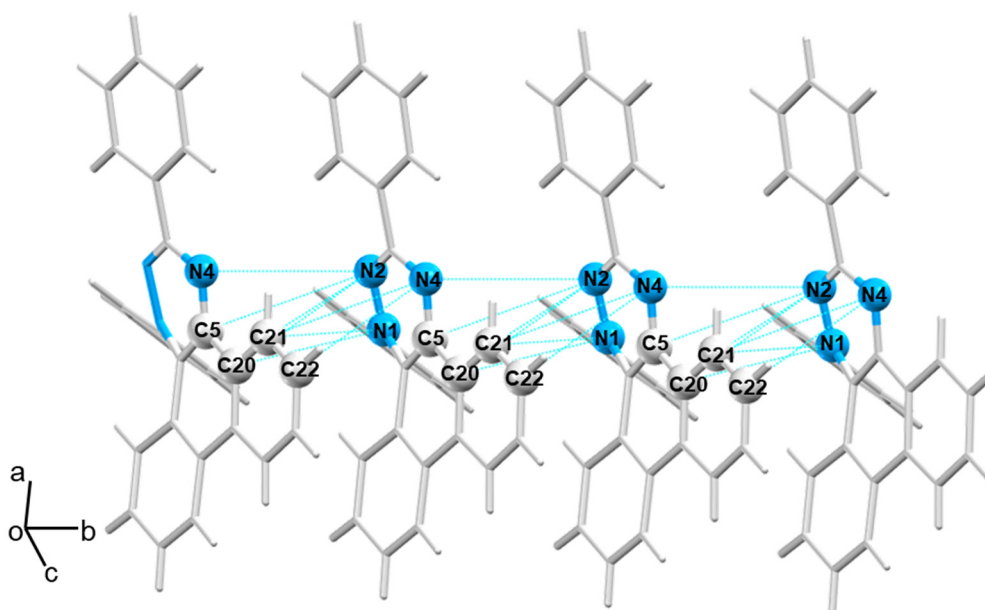

**Fig. S4.** Short intermolecular C $\cdots$ N and N $\cdots$ N contacts in the crystal structure of radical **1**.

**Table S13.** Intermolecular short contacts between C and N, and between N and N atoms, observed in the X-ray crystal structure of radical **1**.

|                | Short contact (Å) |                 | Short contact (Å) |                 | Short contact (Å) |                 | Short contact (Å) |
|----------------|-------------------|-----------------|-------------------|-----------------|-------------------|-----------------|-------------------|
| N4 $\cdots$ N2 | 3.877             | C20 $\cdots$ N1 | 3.822             | C21 $\cdots$ N1 | 3.757             | C21 $\cdots$ N4 | 3.834             |
| C5 $\cdots$ N2 | 3.995             | C20 $\cdots$ N2 | 3.977             | C21 $\cdots$ N2 | 3.674             | C22 $\cdots$ N4 | 3.792             |

## 6. Thermogravimetric Analysis/ Differential Scanning Calorimetry (TGA/DSC)

Empty crucible was used as the reference. In the TGA measurements, **1** (3.7 mg) and **1-*t*Bu** (2.1 mg) was placed in a small sublimation chamber, respectively. Samples were measured in the temperature range of 50 ~ 550 °C with the scanning speed fixed at 10 °C min<sup>-1</sup> and a nitrogen flowing of 100 mL min<sup>-1</sup>. In DSC the measurements, **1** (3.2 mg) and **1-*t*Bu** (2.3 mg) was placed in a 40 μL flat-bottom aluminum crucible (6.0 mm × 1.7 mm), respectively. Samples were measured in the temperature range of 50 ~ 400 °C with the scanning speed fixed at 5 °C min<sup>-1</sup> and a nitrogen flowing of 100 mL min<sup>-1</sup>. The obtained TGA and DSC spectra are shown in Fig. S5 and S6.

Both compounds exhibited similar TGA profiles, with onset decomposition temperatures, corresponding to a 1% weight loss, at 215 °C and 217 °C for **1** and **1-*t*Bu**, respectively. A 5% weight

loss was observed at 314 °C for both radicals, and their maximum decomposition rates occurred at 395 °C. DSC data revealed a distinct endothermic peak at 215 °C for both compounds.

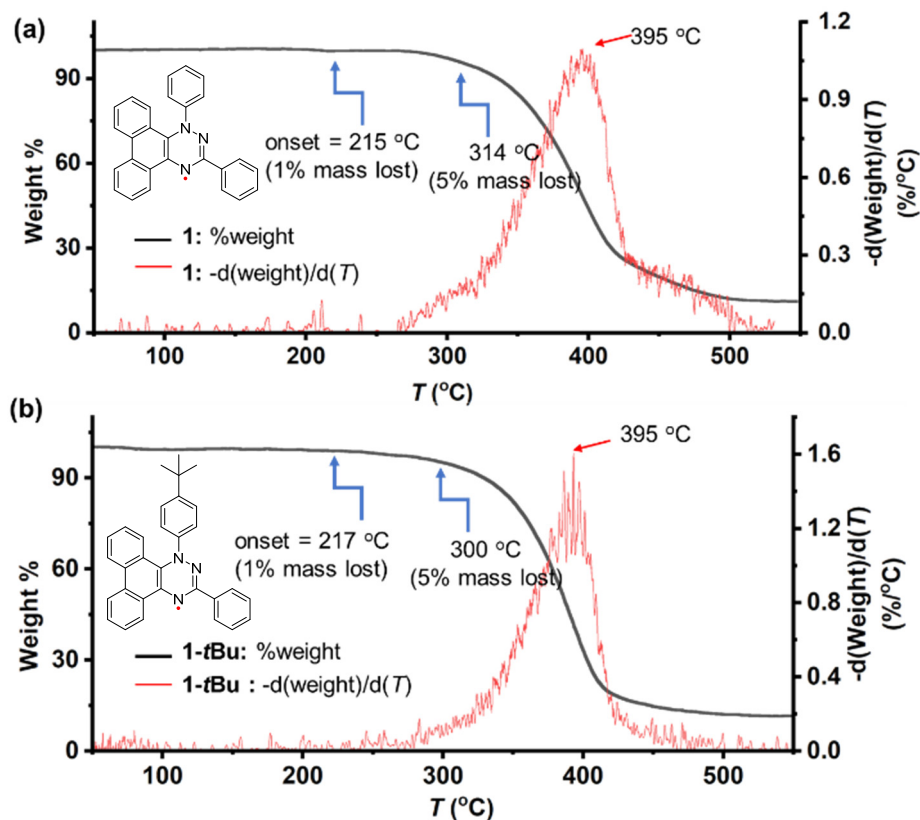

**Fig. S5.** Thermogravimetric analysis of radical **1** (label: 3-P61-U-7, spin concentration 100%) and **1-tBu** (label: 6-P101-O-7, spin concentration 99%). The experiment was carried out under N<sub>2</sub> flow, with a heating rate of 10 °C/min. Data were corrected by subtracting a baseline measured under identical conditions using an empty crucible.

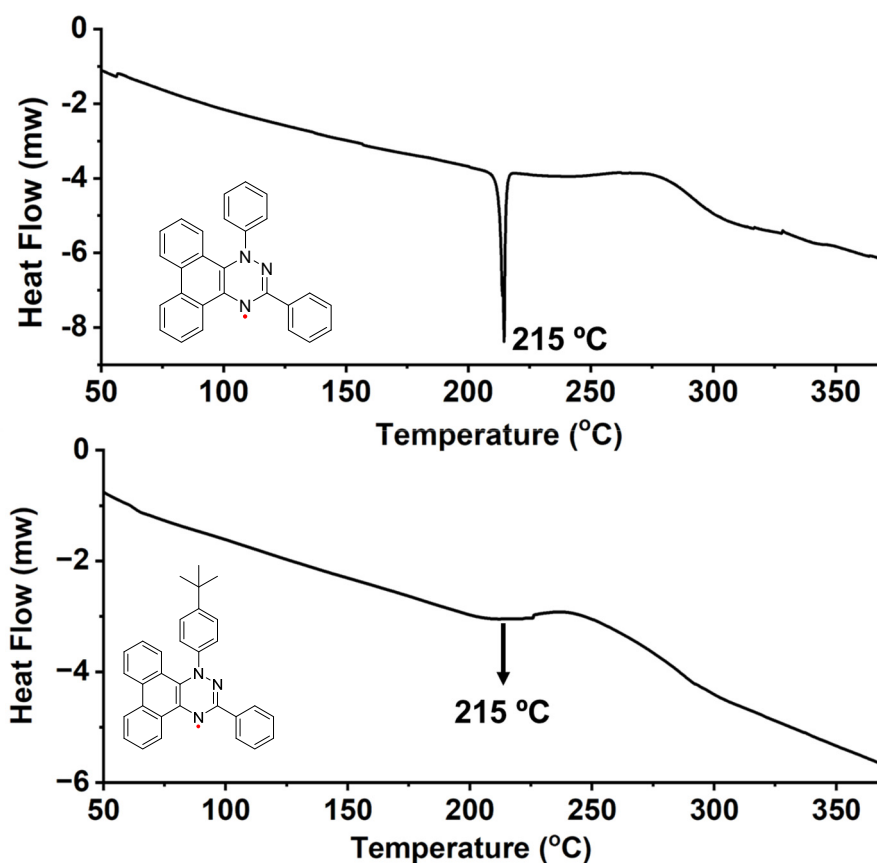

**Fig. S6.** Differential Scanning Calorimetry of radical **1** (label: 3-P61-U-7, spin concentration 100%); and **1-tBu** (label: 6-P101-O-7, spin concentration 99%). The experiment was carried out under N<sub>2</sub> flow, with the heating rate of 5 °C/min. Data were corrected by subtracting a baseline measured under identical conditions using an empty crucible.

## 7. UV-Vis-NIR Spectroscopy

**UV-vis-NIR measurements:** Compound **1** (3.63 mg) and **1-tBu** (4.24 mg) was dissolved in dichloromethane in a 2 mL volumetric flask to prepare a stock solution with concentration of  $4.7 \times 10^{-3}$  M for **1** and  $4.8 \times 10^{-3}$  M for **1-tBu**, respectively. These stock solutions were then diluted to final concentrations of  $2.8 \times 10^{-5}$  M for **1** and  $3.2 \times 10^{-5}$  M for **1-tBu**. The UV-vis-NIR spectra of both compounds in dichloromethane exhibit the longest-wavelength absorption bands at approximately 600–1000 nm, characterized by broad absorption envelopes. According to tauc plot method based on coefficient  $\alpha^{S23}$ , the optical band gaps were determined to be  $E_g^{opt} = 1.35$  eV for radical **1** and  $E_g^{opt} = 1.34$  eV for radical **1-tBu** (Fig. S8).<sup>S24</sup>

**Beer-Lambert plots.** Radical **1** (3.84 mg) in a 10 mL volumetric flask was dissolved using

dichloromethane (DCM) to give a stock solution with concentration of  $1.00 \times 10^{-3}$  M. A series of solutions with varying concentrations (from 1.00 mM to 0.008 mM) were prepared by diluting the stock solution using volumetric flasks. Absorbance measurements on the samples were conducted using 5-mm pathlength quartz cells. The resulting data were plotted as the derived intensity at 468 and 760 nm, respectively, versus concentration, yielding linear Beer-Lambert plots that spanned the 1.00 – 0.008 mM concentration range (Fig. S9).

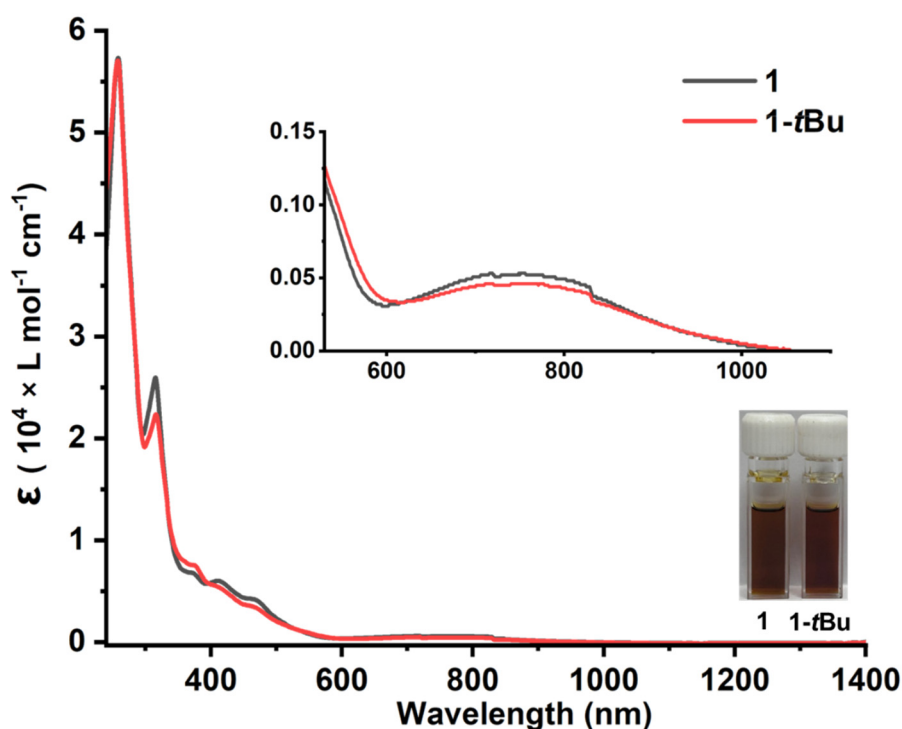

**Fig. S7.** UV-vis-NIR absorption spectrum of **1** ( $2.8 \times 10^{-5}$  M, sample label: 3-P61-U-7, spin concentration 100%) and **1-tBu** ( $3.2 \times 10^{-5}$  M, label: 6-P101-O-7, spin concentration 99%) in  $\text{CH}_2\text{Cl}_2$ . Insert spectra: Zoom of the UV-vis-NIR absorption spectra at  $\lambda = 570\text{--}1200$  nm. Insert pictures: The corresponding samples in the UV cells under the regular condition. **1**: Bands at  $\lambda_{\text{max}} = 259, 316$  and  $760$  nm have the following extinction coefficients ( $\text{L mol}^{-1} \text{cm}^{-1}$ ):  $\epsilon_{259} = 5.7 \times 10^4$ ,  $\epsilon_{316} = 2.3 \times 10^4$  and  $\epsilon_{760} = 5.7 \times 10^2$ . **1-tBu**: Bands at  $\lambda_{\text{max}} = 256, 315$  and  $753$  nm have the following extinction coefficients ( $\text{L mol}^{-1} \text{cm}^{-1}$ ):  $\epsilon_{256} = 5.7 \times 10^4$ ,  $\epsilon_{315} = 2.2 \times 10^4$  and  $\epsilon_{753} = 4.4 \times 10^2$ .

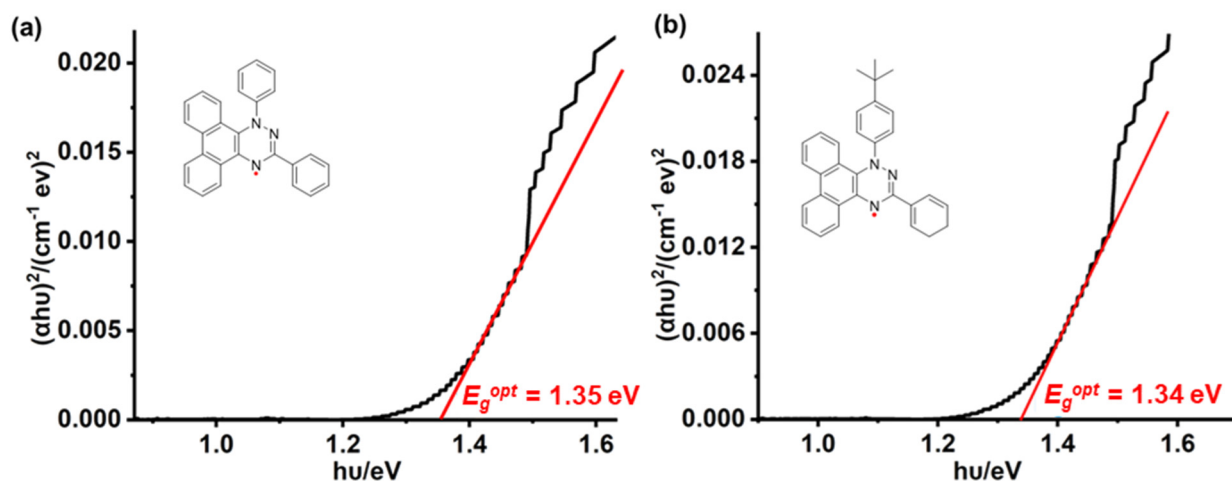

**Fig. S8.** The determinations of  $E_g^{opt}$  for **1** (0.075 mM, label: 3-P61-U-7, spin concentration 100%) and **1-tBu** (0.1 mM, label: 6-P101-O-7, spin concentration 99%).

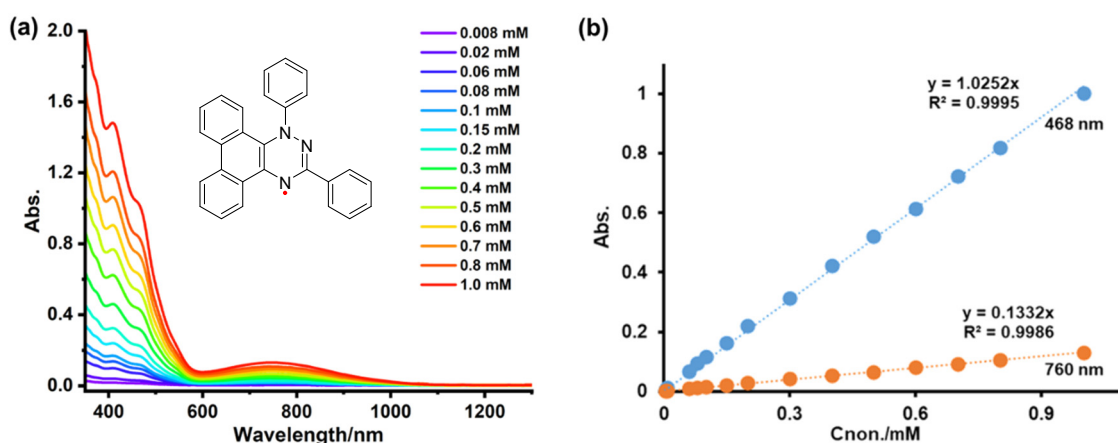

**Fig. S9.** (a) UV-vis-NIR absorption spectrum of **1** (label: 3-P61-U-7, spin concentration 100%) at different concentrations in  $\text{CH}_2\text{Cl}_2$ ; Light path-length was 5 mm. (b) The corresponding absorption intensity at 468 and 760 nm, respectively, as a function of the concentration.

## 8. Electron Paramagnetic Resonance Spectroscopy

DPPH powder ( $g = 2.0037$ ) was used as a  $g$ -value reference. Each of the solutions was drawn into an EPR-quality quartz capillary tube (0.6-mm I.D.). The capillary was stoppered with parafilm and placed in a 5-mm O.D. EPR sample tube, then positioned immediately in the EPR cavity. Series of spectra was obtained at 295 K.

**Spin concentrations.** Compound **1** and **1-tBu** was dissolved with toluene in a 25 mL volumetric flask, respectively, to give a roughly 1 mM sample solution. Similarly, TEMPO (3.91 mg) was dissolved with toluene in 25 mL volumetric bottle to give a 1.0 mM standard radical sample. The

EPR spectra were obtained at 295 K. The spin concentrations of the radicals were determined by comparing the double-integrated EPR signal intensity of its solution with that of the TEMPO standard of known concentration.

**Spectra for simulation.** To perform spectral simulation, diluted solutions of the free radicals were prepared. Compound **1** (1.44 mg) was dissolved with dichloromethane (DCM) or toluene in a 25 mL volumetric flask to give a 0.15 mM sample solution; and compound **1-*t*Bu** (2.20 mg) was dissolved with toluene in a 25 mL volumetric flask to give a 0.20 mM sample solution. The corresponding EPR spectra of **1** in DCM and **1-*t*Bu** in toluene acquired at 295 K are shown in Fig. S10 and S11. The EPR spectrum of **1** in toluene exhibited insufficient resolution for reliable simulation under the fast-motion approximation.

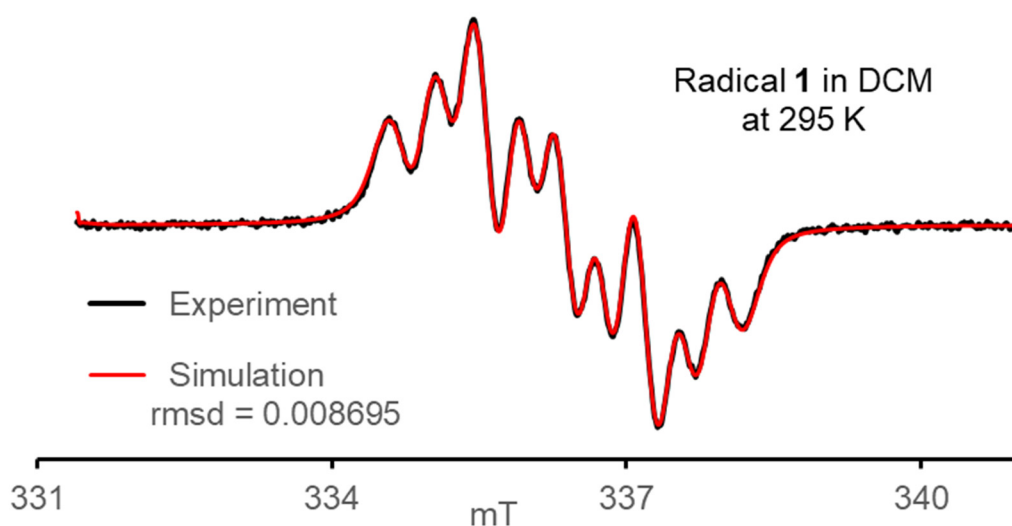

| No. | Item           | Value    | Standard Deviation               | 95% Confidence Interval |            |
|-----|----------------|----------|----------------------------------|-------------------------|------------|
| 1   | arg1.g         | 2.00293  | 4.61725×10 <sup>5</sup> (0.002%) | 2.002842                | -2.003022  |
| 2   | arg1.A(1,1)    | 21.89440 | 0.08093118 (0.370%)              | 21.73578                | -22.05302  |
| 3   | arg1.A(1,2)    | 12.58950 | 0.4870437 (3.869%)               | 11.63491                | -13.54409  |
| 4   | arg1.A(1,3)    | 11.76190 | 0.8227526 (6.995%)               | 10.14933                | -13.37447  |
| 5   | arg1.lwpp(1,1) | 0.283922 | 0.03232706 (11.386%)             | 0.2205621               | -0.3472819 |
| 6   | arg1.lwpp(1,2) | 0.146061 | 0.04211096 (28.831%)             | 0.06352503              | -0.228597  |

**Fig. S10.** EPR spectra (9.4294 GHz, modulation amplitude = 0.05 mT) of radical **1** (0.15 mM, label: 3-P61-U-7, spin concentration 100%) in DCM. Simulation:  $g = 2.0029$ ,  $\alpha_{N(1)} = 21.89$  MHz ( $n = 1$ ),  $\alpha_{N(2)} = 12.59$  MHz ( $n = 1$ ),  $\alpha_{N(3)} = 11.76$  MHz ( $n = 1$ ); correlation coefficient near 1.0 between Lorentzian and Gaussian components of the Voigt line shape.

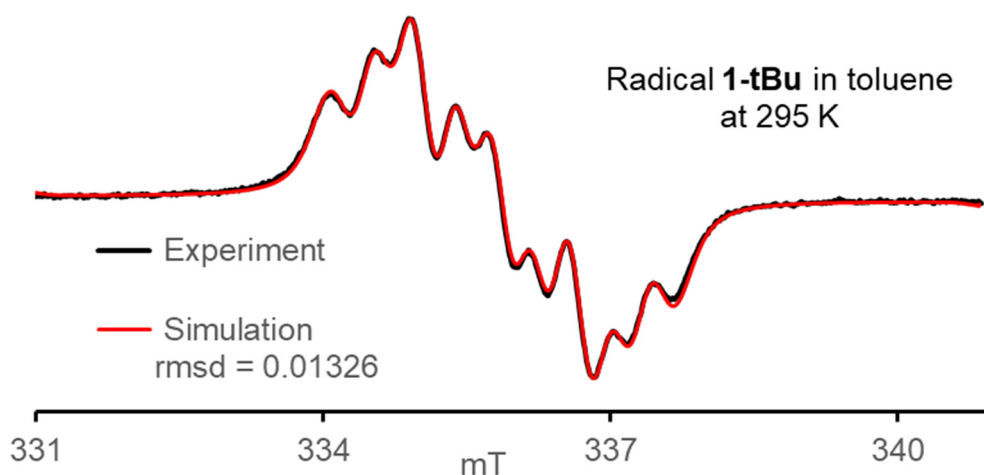

| No. | Item           | Value    | Standard Deviation                | 95% Confidence Interval |            |
|-----|----------------|----------|-----------------------------------|-------------------------|------------|
| 1   | arg1.g         | 2.003191 | 1.83365×10 <sup>5</sup> (0.001 %) | 2.003155                | -2.003227  |
| 2   | arg1.A(1,1)    | 21.82530 | 2.320289 (10.631 %)               | 17.27762                | -26.37298  |
| 3   | arg1.A(1,2)    | 12.96110 | 3.253666 (25.103 %)               | 6.584032                | -19.33817  |
| 4   | arg1.A(1,3)    | 11.24130 | 3.432502 (30.535 %)               | 4.513719                | -17.96888  |
| 5   | arg1.lwpp(1,1) | 0.281702 | 0.01172936 (4.164 %)              | 0.2587129               | -0.3046911 |
| 6   | arg1.lwpp(1,2) | 0.199497 | 0.01389118 (6.963 %)              | 0.1722708               | -0.2267232 |

**Fig. S11.** EPR spectrum (9.4168 GHz, modulation amplitude = 0.05 mT) of radical **1-tBu** (0.20 mM, label: 6-P101-O-7, spin concentration 99%) in toluene. Simulation:  $g = 2.0032$ ,  $\alpha_{N(1)} = 21.83$  MHz ( $n = 1$ ),  $\alpha_{N(2)} = 12.96$  MHz ( $n = 1$ ),  $\alpha_{N(3)} = 11.24$  MHz ( $n = 1$ ); correlation coefficient near 1.0 between Lorentzian and Gaussian components of the Voigt line shape.

**Table S14.** DFT-calculated isotropic <sup>14</sup>N hyperfine coupling constants (in MHz) for **1**, **2** and **Blatter** in different media. Insert figures: (a) Illustration of the general structure and labelling of the three nitrogen atoms in the Blatter-type radicals; (b) Plot of experimental vs. DFT-calculated <sup>14</sup>N hyperfine coupling constants for neutral radical **1** in DCM. The solid line represents the linear regression fit through the predicted values, with the regression equation and  $R^2 = 0.97$  shown in the figure demonstrating excellent agreement with the fitted model. The strong correlation supports the assignment of the observed species to neutral radical **1**.

| Species        | Basis Set         | Medium    | Solvent Model | Hyperfine Coupling Constants (MHz) |         |         |
|----------------|-------------------|-----------|---------------|------------------------------------|---------|---------|
|                |                   |           |               | N1                                 | N2      | N4      |
| <b>1</b>       | M062X/def2TZVP    | gas phase | /             | 20.0785                            | 14.2083 | 16.1387 |
|                | M062X/def2TZVP    | DCM       | SMD           | 21.6004                            | 13.9795 | 15.9426 |
|                | UB3LYP/6-31G(d,p) | toluene   | PCM           | 19.1213                            | 13.1013 | 14.1864 |
| <b>2</b>       | M062X/def2TZVP    | gas phase | /             | 18.7857                            | 15.5993 | 16.9163 |
|                | M062X/def2TZVP    | DCM       | SMD           | 20.1715                            | 14.8650 | 16.6362 |
|                | UB3LYP/6-31G(d,p) | toluene   | PCM           | 17.0315                            | 13.6422 | 14.5744 |
| <b>Blatter</b> | M062X/def2TZVP    | gas phase | /             | 19.6935                            | 17.1791 | 17.7218 |
|                | M062X/def2TZVP    | DCM       | SMD           | 21.4430                            | 15.8929 | 17.5773 |
|                | UB3LYP/6-31G(d,p) | toluene   | PCM           | 18.4066                            | 15.2504 | 15.4786 |

(a)

(b)

in DCM

Regression Equation:  
 $y = 1.3963x - 8.5453$   
 $R^2 = 0.9683$

## 9. Electrochemistry Measurements

The cyclic and differential pulse voltammetry measurements were carried out at 25 °C in a glovebox under argon atmosphere.

In the measurements, radical **Blatter** (1.42 mg, prepared according to the procedure reported in the literature<sup>S10</sup>, **1** (1.92 mg, label: 9-P62-U-7, spin concentration 98%) and **1-tBu** (2.20 mg, label: 9-P59-O-7, spin concentration 100%) were first evacuated under high vacuum for 3 hours. Freshly prepared dichloromethane was obtained from solvent purification system, then distilled from calcium hydride under nitrogen. Supporting electrolyte tetrabutylammonium hexafluorophosphate (*n*-Bu<sub>4</sub>NPF<sub>6</sub>) was recrystallized 3× from methanol, then dried under high vacuum for 48 hours at 70 °C. In an argon glovebox, the radicals and *n*-Bu<sub>4</sub>NPF<sub>6</sub> were dissolved in 5 mL dichloromethane to give a solution with the concentration of 1 mM for **1** and **1-tBu** containing *n*-Bu<sub>4</sub>NPF<sub>6</sub> (0.1 M), respectively.

Three electrodes were employed, including a glass carbon electrode (4 mm in diameter) as the working electrode, a platinum wire as counter electrode and an Ag electrode as the reference one. Cyclic and differential pulse voltammograms with the scanning rates in the 100 mV s<sup>-1</sup> were obtained (Fig. 12). In the end of each measurement, ferrocene (0.93 mg, ferrocene: radical = 1:1, mol/mol) was added to the cell and the peak potentials were referenced to the Fc/Fc<sup>+</sup> couple (0.46 V vs SCE).<sup>S25</sup> A background measurement was performed under the identical condition using the same solvent and supporting electrolyte (0.1 M *n*-Bu<sub>4</sub>NPF<sub>6</sub> in dichloromethane) in the absence of the radicals. The background current was subtracted from each voltammogram to obtain the net Faradaic responses.

A detailed investigation into the electrochemical reaction mechanisms and fundamental kinetics of compounds **1** and **1-tBu** was next conducted using variable scan-rate and concentration-dependent cyclic voltammetries. For the variable scan-rate measurements, in the glovebox, compound **1** (20.03 mg, label: 9-P62-U-7, spin concentration: 98%) and **1-tBu** (22.91 mg, label: 9-P59-O-7, spin concentration: 100%) was dissolved into dichloromethane in a 2 mL volumetric flask, respectively, to give a stock solution, each with a concentration of 26 mM. These stock solutions were subsequently diluted to a final concentration of 1.0 mM in 25 mL of dichloromethane in volumetric flask containing *n*-Bu<sub>4</sub>NPF<sub>6</sub> (0.1 M) as the supporting electrolyte. For each measurement, 2 mL of the resulting solution was used to perform CV scans over a potential range of -1.2 to 0.9 V (vs. Fc/Fc<sup>+</sup>) at different scan rates. The background current obtained at the corresponding scan rate was subtracted from each CV to yield the net cyclic voltammogram. The results are presented in Fig. S13–S16. Subsequently, CV experiments were carried out at different radical concentrations. Specifically, the 26 mM stock solutions of the radicals were serially diluted to prepare 2 mL samples with concentrations ranging from 0.20 to 1.4 mM, each containing [*n*-Bu<sub>4</sub>N]<sup>+</sup>[PF<sub>6</sub>]<sup>-</sup> (0.1 M). Cyclic voltammetry was performed over the potential window of -1.2 to 0.9 V with a fixed scanning rate of 100 mV s<sup>-1</sup>. The Background

CV was acquired under the same conditions (0.1 M *n*-Bu<sub>4</sub>NPF<sub>6</sub> in dichloromethane, scan rate = 100 mV s<sup>-1</sup>) and subtracted from each concentration-dependent voltammogram. The corresponding results are shown in Fig. S17–S20.

Through the study of the electrochemical behavior of **1** and **1-*t*Bu**, we found that the compounds have the same reversible electrochemical behavior as the Blatter free radical (Fig. 6b and Fig. S12, Table 1). The compounds have one reversible oxidation potential peaks ( $E_{1/2}^{0/+1} = 0.09$  V for **1** and  $E_{1/2}^{0/+1} = 0.06$  V for **1-*t*Bu**) and one reversible reduction potential peak ( $E_{1/2}^{-1/0} = -0.66$  V for **1** and  $E_{1/2}^{-1/0} = -0.72$  V for **1-*t*Bu**). Compared with the original Blatter radical ( $E_{1/2}^{0/+1} = 0.28$  V,  $E_{1/2}^{-1/0} = -0.92$  V), the oxidation potential is decreased and the reduction potential is increased. The electrochemical energy gap of **1** and **1-*t*Bu** are therefore determined to be 0.75 eV and 0.78 eV, respectively.

Variable scan-rate and concentration-dependent cyclic voltammeteries reveal key characteristics of a reversible, diffusion-controlled, single-electron transfer process. This is supported by a linear relationship of both the anodic and cathodic peak currents ( $i_p$ ) with the square root of the scan rate ( $v^{1/2}$ , see Fig. S14–S15) and the radical concentration (Fig. S18–S19), coupled with the invariance of the respective peak potentials (Fig. S16 and S20).

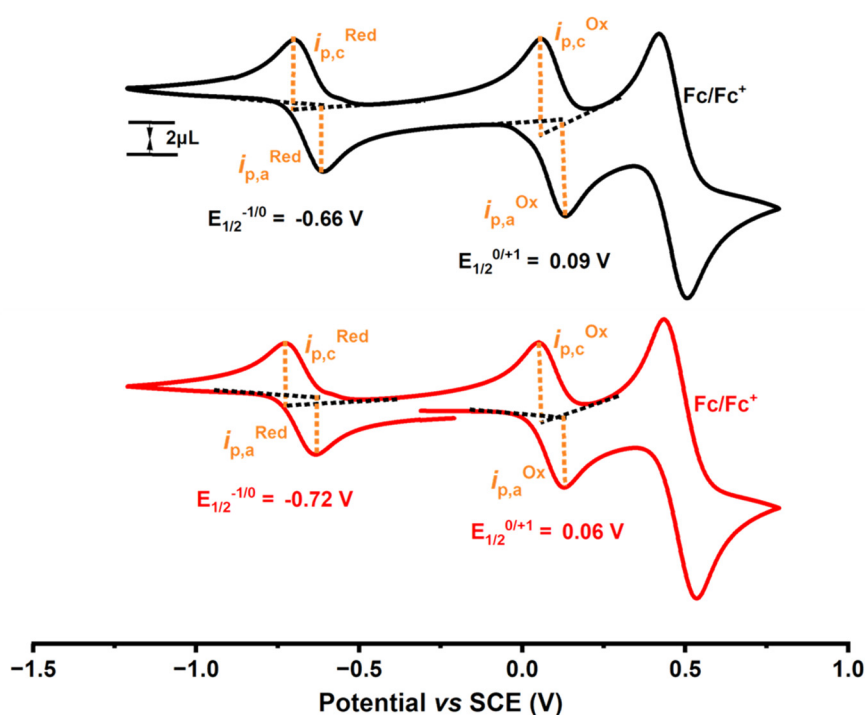

**Fig. S12.** Cyclic voltammetry of radicals **1** (1 mM) and **1-*t*Bu** (1 mM) in dichloromethane containing *n*-Bu<sub>4</sub>NPF<sub>6</sub> (0.1 M) as an electrolyte. Reference electrode = Ag/AgCl; scan rate = 100 mV s<sup>-1</sup>; temperature = 25 °C. Fc/Fc<sup>+</sup> (0.46 V) was used as an internal reference.

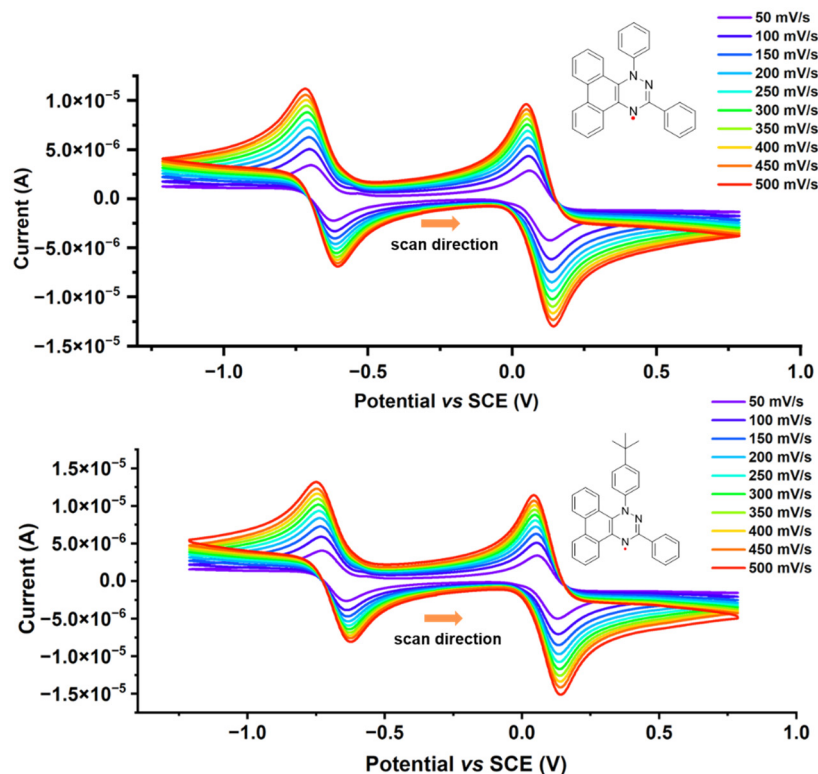

**Fig. S13.** Variable scan-rate cyclic voltammetry of radicals **1** (1.0 mM) and **1-tBu** (1.0 mM) in DCM containing *n*-Bu<sub>4</sub>NPF<sub>6</sub> (0.1 M) as an electrolyte. Reference electrode = Ag/AgCl; temperature = 25 °C. Fc/Fc<sup>+</sup> (0.462 V) was used as an internal reference.

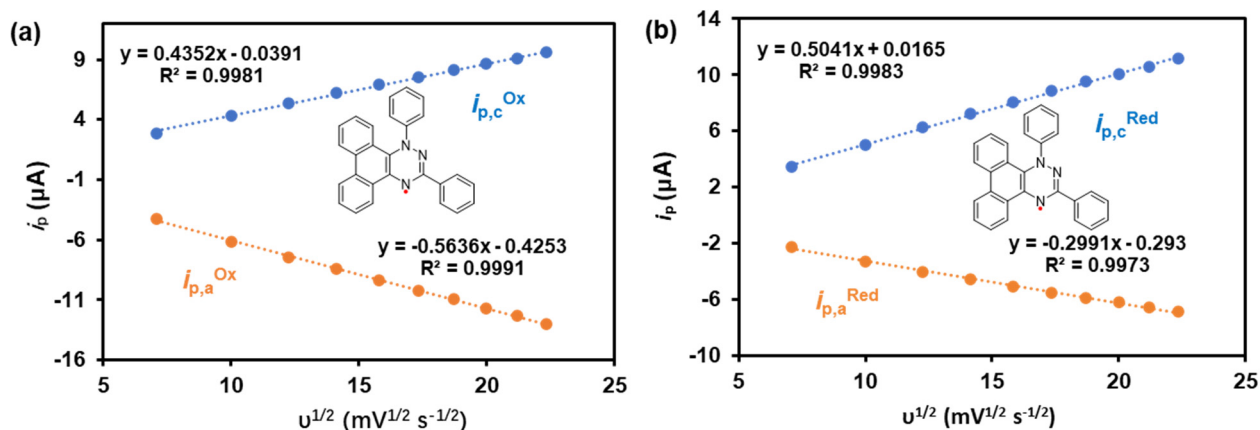

**Fig. S14.** Plots of peak currents ( $i_p$ ) versus the square root ( $v^{1/2}$ ) of scan rate for radical **1**. Data are derived from the spectra shown in Fig. S13.  $i_{p,a}^{Ox}$ , the anodic peak current for the first redox couple, corresponding to the oxidation of the neutral radical to its cation;  $i_{p,c}^{Ox}$ , the cathodic peak current for the first redox couple, corresponding to the reduction of the generated cation back to the neutral radical;  $i_{p,c}^{Red}$ , the cathodic peak current for the second redox couple, corresponding to the reduction of the neutral radical to its anion;  $i_{p,a}^{Red}$ , the anodic peak current for the second redox couple, corresponding to the oxidation of the generated anion back to the neutral radical. For illustrations of these different peak currents, see Fig. S13.

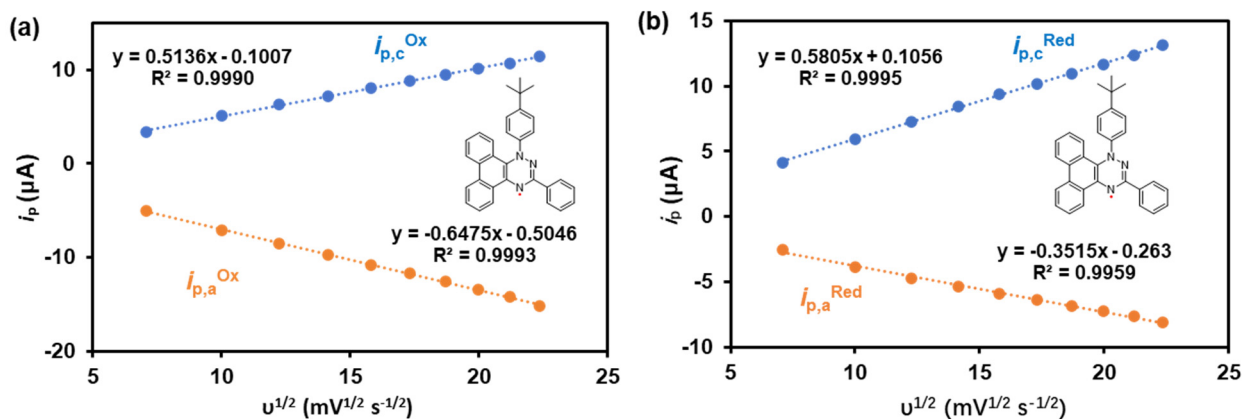

**Fig. S15.** Plots of peak currents ( $i_p$ ) versus the square root ( $v^{1/2}$ ) of scan rate for radical **1-tBu**. Data are derived from the spectra shown in Fig. S13.  $i_{p,a}^{Ox}$ , the anodic peak current for the first redox couple, corresponding to the oxidation of the neutral radical to its cation;  $i_{p,c}^{Ox}$ , the cathodic peak current for the first redox couple, corresponding to the reduction of the generated cation back to the neutral radical;  $i_{p,c}^{Red}$ , the cathodic peak current for the second redox couple, corresponding to the reduction of the neutral radical to its anion;  $i_{p,a}^{Red}$ , the anodic peak current for the second redox couple, corresponding to the oxidation of the generated anion back to the neutral radical. For illustrations of these different peak currents, see Fig. S12.

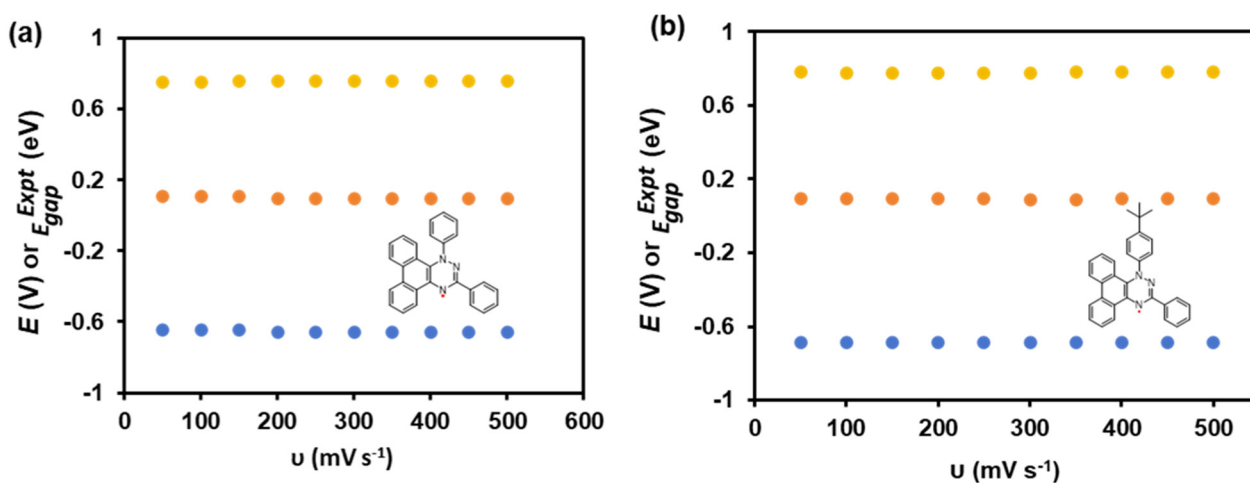

**Fig. S16.** The experimental oxidation ( $E_{1/2}^{-1/0}$ ) and reduction ( $E_{1/2}^{0/+1}$ ) potentials as well as the redox gaps ( $E_{gap}^{Expt}$ ) at different scan rates for **1** and **1-tBu**. Data are derived from the spectra shown in Fig. S13.

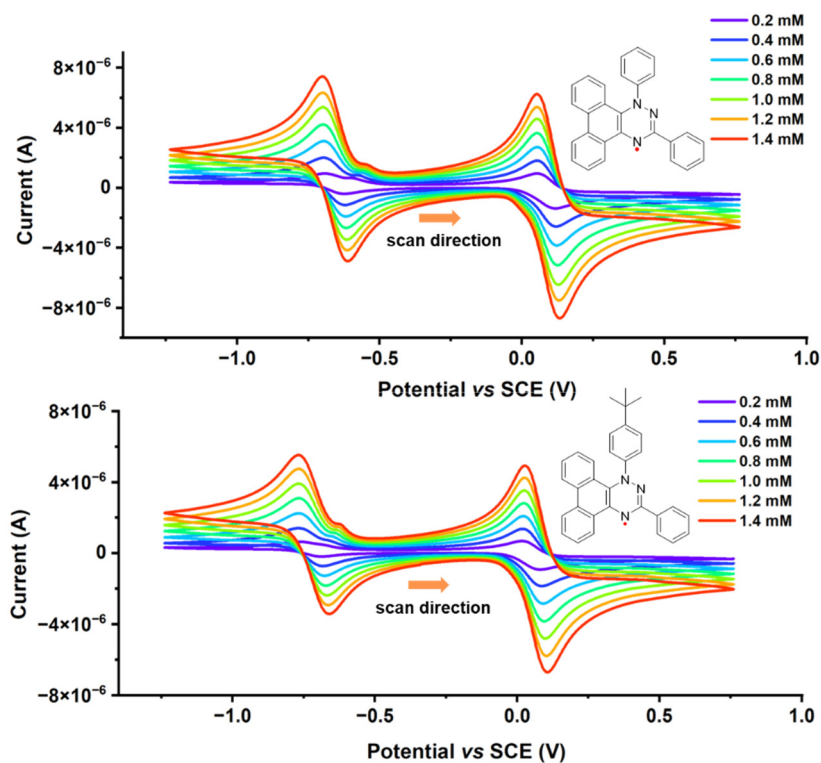

**Fig. S17.** Concentration-dependent cyclic voltammetry of radicals **1** and **1-*t*Bu** in DCM containing *n*-Bu<sub>4</sub>NPF<sub>6</sub> (0.1 M) as an electrolyte. Reference electrode = Ag/AgCl; scan rate = 100 mV s<sup>-1</sup>; temperature = 25 °C. Fc/Fc<sup>+</sup> (0.462 V) was used as an internal reference.

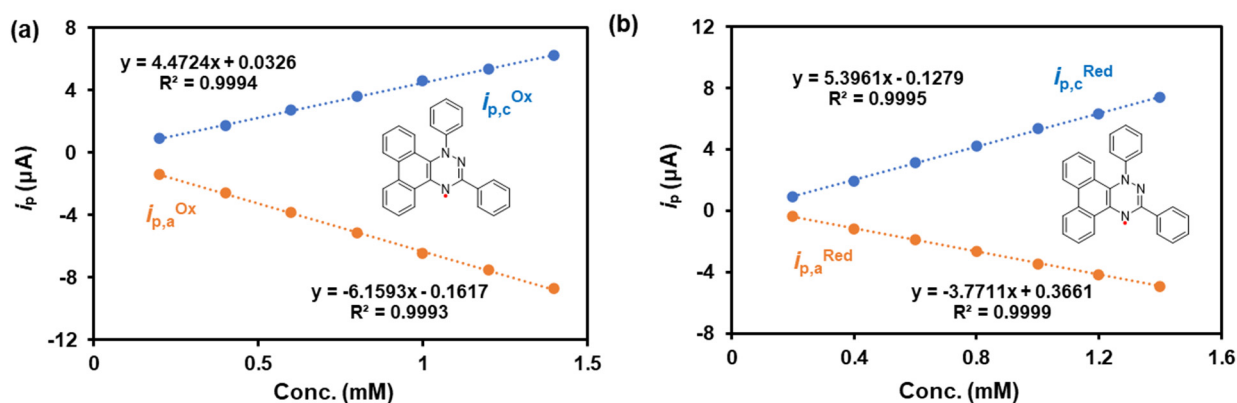

**Fig. S18.** Plots of peak currents ( $i_p$ ) versus the concentration (Conc.) of **1** under a fixed scan rate of 100 mV s<sup>-1</sup>. Data are derived from the spectra shown in Fig. S17.  $i_{p,a}^{Ox}$ , the anodic peak current for the first redox couple, corresponding to the oxidation of the neutral radical to its cation;  $i_{p,c}^{Ox}$ , the cathodic peak current for the first redox couple, corresponding to the reduction of the generated cation back to the neutral radical;  $i_{p,c}^{Red}$ , the cathodic peak current for the second redox couple, corresponding to the reduction of the neutral radical to its anion;  $i_{p,a}^{Red}$ , the anodic peak current for the second redox couple, corresponding to the oxidation of the generated anion back to the neutral radical. For illustrations of these different peak currents, see Fig. S12.

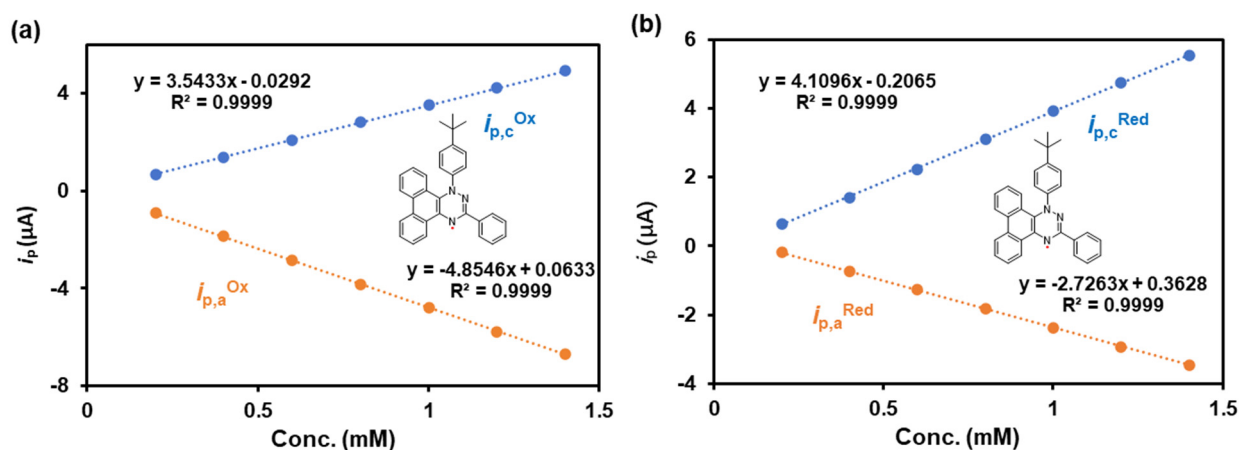

**Fig. S19.** Plots of peak currents ( $i_p$ ) versus the concentration (Conc.) of **1-tBu** under a fixed scan rate of  $100 \text{ mV s}^{-1}$ . Data are derived from the spectra shown in Fig. S17.  $i_{p,a}^{\text{Ox}}$ , the anodic peak current for the first redox couple, corresponding to the oxidation of the neutral radical to its cation;  $i_{p,c}^{\text{Ox}}$ , the cathodic peak current for the first redox couple, corresponding to the reduction of the generated cation back to the neutral radical;  $i_{p,c}^{\text{Red}}$ , the cathodic peak current for the second redox couple, corresponding to the reduction of the neutral radical to its anion;  $i_{p,a}^{\text{Red}}$ , the anodic peak current for the second redox couple, corresponding to the oxidation of the generated anion back to the neutral radical. For illustrations of these different peak currents, see Fig. S12.

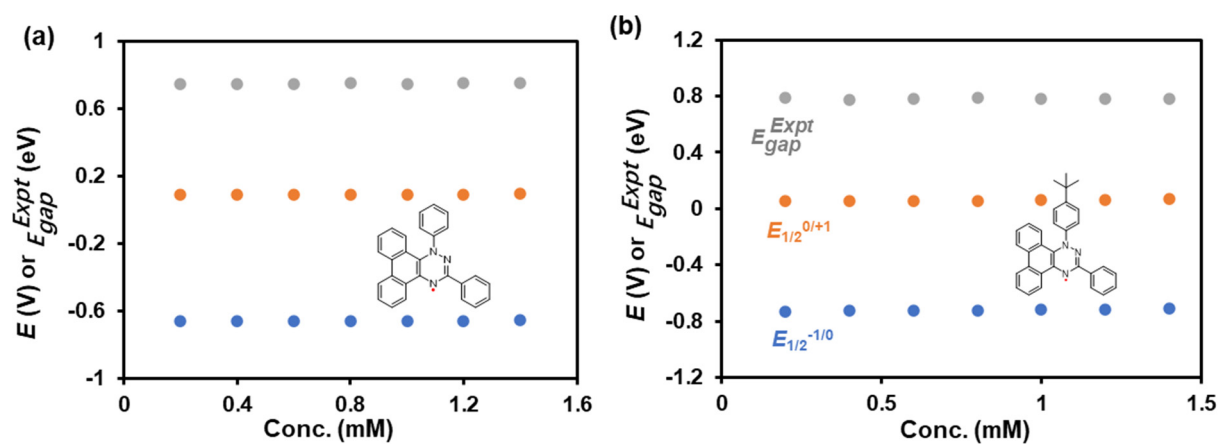

**Fig. S20.** The experimental oxidation ( $E_{1/2}^{-1/0}$ ) and reduction ( $E_{1/2}^{0/+1}$ ) potentials as well as the redox gaps ( $E_{gap}^{\text{Expt}}$ ) at different concentrations of **1** and **1-tBu**. Data are derived from the spectra shown in Fig. S17.

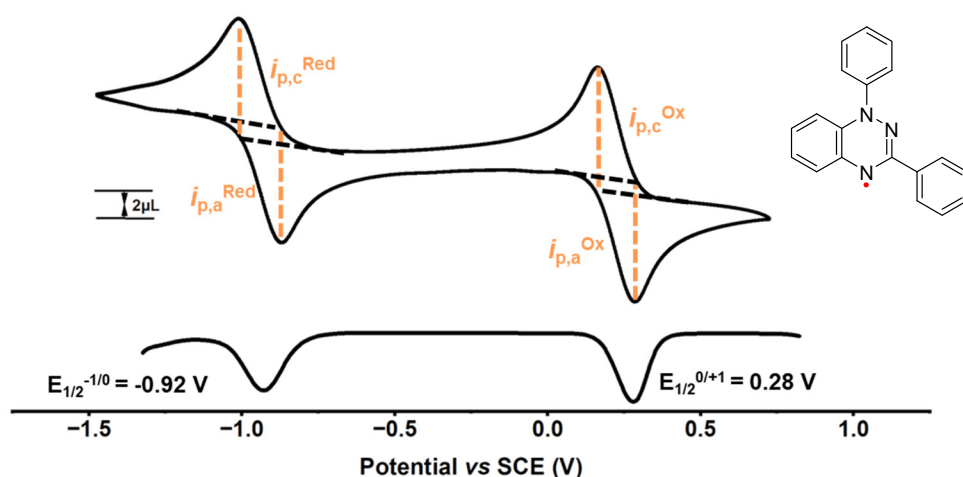

**Fig. S21.** Cyclic voltammetry of **Blatter** (1 mM) in dichloromethane containing *n*-Bu<sub>4</sub>NPF<sub>6</sub> (0.1 M) as an electrolyte. Reference electrode = Ag/AgCl; scan rate = 100 mV s<sup>-1</sup>; temperature = 25 °C. Fc/Fc<sup>+</sup> (0.46 V) was used as an internal reference ( $i_{p,c}^{\text{Red}} = 8.57 \mu\text{A}$ ,  $i_{p,a}^{\text{Red}} = -8.53 \mu\text{A}$ ,  $i_{p,c}^{\text{Ox}} = 9.03 \mu\text{A}$ ,  $i_{p,a}^{\text{Ox}} = -8.91 \mu\text{A}$ ).

## 10. Computational Details

**General Methods.** DFT calculations were performed using the Gaussian 09 program package<sup>S26</sup> in Linux operating system. At first, the geometries for the studies radicals were obtained by full system optimization at the M06-2X/def2-TZVP level of theory,<sup>S27</sup> using SMD<sup>S28</sup> solvation model for dichloromethane. Dispersion was taken into account using Grimme's empirical dispersion correction (D3 version) (empiricaldispersion=GD3).<sup>S29</sup> Frequencies were also calculated at the same level of theory to ensure the stationary points represented the minima on the potential energy surfaces. Orbital plots were obtained using cube files with "coarse" setting and the surfaces plotted with isodensity 0.02.

Based on the optimized geometries in dichloromethane, NICS(1)<sub>zz</sub> and 2D-NICS for all the studies radicals were calculated using the GIAO-B3LYP/6-31g(d,p) method and SMD model. For NICS(1)<sub>zz</sub> computations, the ghost atoms (Bq) are located at the distance of 1 Å above or below the center of entire mass of the ring systems. The excitation energies, oscillators, and rotational strengths of 30 lowest-lying singlet excited states of **1** and **1-tBu** were calculated using TD-DFT(ub3lyp/6-31+g(d,p)/SMD). The Boltzmann-averaged UV-vis-NIR spectra were obtained by using the Gaussian functions with half-width of 0.42 eV through the aid of Multiwfn3.4.<sup>S30</sup>

Radicals **1** and **1-tBu** were also fully optimized in the gas phase at the M06-2X-GD3/def2-TZVP level of theory. The spin density plots for the radicals in the gas phase were visualized by GaussView 6.0, using “medium” setting and an isodensity of 0.003 electron Bohr<sup>-3</sup> for surface plotting.

The redox potentials were calculated at the M06-2X-GD3/def2-TZVP level of theory using the method based on Born-Haber cycle (Scheme S3),<sup>S31</sup> where the standard Gibbs free energies of redox half reactions consist of the free energy change in the gas phase and the solvation free energies of the oxidized and reduced species:

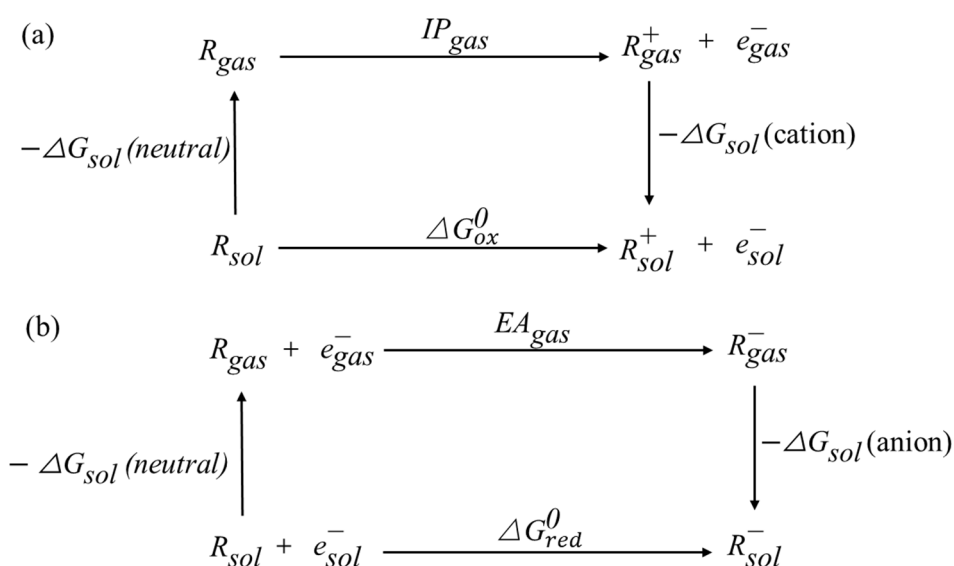

**Scheme S3.** The Born-Haber cycle.

In the computations, the gas-phase ionization potentials ( $IP_{gas}$ ) are determined by the enthalpy changes between the cationic and neutral molecules, whereas the gas-phase electron affinities ( $EA_{gas}$ ) are the differences between neutral and anionic molecules:

$$IP_{gas} = (E^0 + ZPVE + E_{therm})_{cation} - (E^0 + ZPVE + E_{therm})_{neutral} \quad (S1)$$

$$EA_{gas} = (E^0 + ZPVE + E_{therm})_{neutral} - (E^0 + ZPVE + E_{therm})_{anion} \quad (S2)$$

where  $E^0$  is the total electronic energy, ZPVE the zero-point vibrational energy and  $E_{therm}$  the thermal correction to the energy. The free energies of the oxidation ( $\Delta G_{ox}^0$ ) and reduction reactions ( $\Delta G_{red}^0$ ) were determined based on the obtained  $IP_{gas}$  and  $EA_{gas}$ , corrected by solvation effects through Eqs. S3 and S4:

$$\Delta G_{ox}^0 = IP_{gas} + \Delta G_{sol}(cation) - \Delta G_{sol}(neutral) \quad (S3)$$

$$\Delta G_{red}^0 = -EA_{gas} + \Delta G_{sol}(anion) - \Delta G_{sol}(neutral) \quad (S4)$$

where  $\Delta G_{sol}$ , including  $\Delta G_{sol}(neutral)$ ,  $\Delta G_{sol}(cation)$  and  $\Delta G_{sol}(anion)$ , denote the solvation free energy for each species. The corresponding thermodynamic redox potentials,  $E_{ox}$  and  $E_{red}$ , were calculated by Faraday's law:

$$E_{ox} = \frac{\Delta G_{ox}^0}{nF} \quad (S5)$$

$$E_{red} = \frac{-\Delta G_{red}^0}{nF} \quad (S6)$$

where  $n$  is the number of electrons transferred ( $n=1$  in the studies cases) and  $F$  is the Faraday constant.

The differential solvation stabilization energy ( $\Delta\Delta G_{sol}$ ) was determined by,

$$\Delta\Delta G_{sol} = -\Delta G_{sol}(anion) - \Delta G_{sol}(cation) + 2\Delta G_{sol}(neutral) \quad (S7)$$

The results are shown in Fig. 2 and Table 1 in the main text as well as Fig. S22–S30 and Table S15–S22.

**Table S15.** The DFT (SMD M06-2X-GD3/def2-TZVP) calculations for the radicals Blatter and **1–8** in dichloromethane: charge ( $e$ ), spin multiplicity, energies ( $E^\circ$ , hartree), zero-point vibrational energies (ZPVE, hartree), ZPVE-corrected energy ( $E^\circ + ZPVE$ , hartree), sum of electronic and thermal free energies ( $G$ , hartree, 298 K), Sum of electronic and thermal Enthalpies ( $H$ , hartree, 298 K), total entropy (electronic, translational, rotational and vibrational,  $S$ ,  $\text{cal}\cdot\text{mol}^{-1}\cdot\text{K}^{-1}$ , 298 K), dipole moment (total,  $\mu$ , Debye), and imaginary and lowest vibrational frequencies ( $\text{cm}^{-1}$ ).<sup>a</sup>

| Species             | Chrg. <sup>b</sup> | Spin Multiplicity | Point grp. <sup>c</sup> | $E^\circ$      | ZPVE     | $E^\circ + ZPVE$ | $G$ (298 K)  | $H$ (298 K)  | $S$ (298 K) | $\langle S^2 \rangle$ | $\mu$ | RMS Gradt. <sup>d</sup> ( $\times 10^{-6}$ ) | Lowest Vibrational Frequencies |
|---------------------|--------------------|-------------------|-------------------------|----------------|----------|------------------|--------------|--------------|-------------|-----------------------|-------|----------------------------------------------|--------------------------------|
| <b>Blatter</b>      | 0                  | 2                 | $C_1$                   | -896.658916358 | 0.28542  | -896.373497      | -896.419484  | -896.356498  | 132.566     | 0.7680                | 4.40  | 2                                            | 18.1, 52.7                     |
| <b>1</b>            | 0                  | 2                 | $C_1$                   | -1203.93863275 | 0.380381 | -1203.558252     | -1203.610284 | -1203.535914 | 156.524     | 0.7669                | 3.76  | 3                                            | 28.2, 29.5                     |
| <b>1-<i>t</i>Bu</b> | 0                  | 2                 | $C_1$                   | -1361.17552287 | 0.492750 | -1360.682773     | -1360.742489 | -1360.654851 | 184.450     | 0.7669                | 4.30  | 2                                            | 7.75, 22.9                     |
| <b>2</b>            | 0                  | 2                 | $C_1$                   | -1280.17920394 | 0.393449 | -1279.785755     | -1279.837762 | -1279.762873 | 157.617     | 0.7722                | 4.05  | 9                                            | 37.4, 40.6                     |
| <b>3</b>            | 0                  | 2                 | $C_1$                   | -1618.17578148 | 0.368856 | -1617.806926     | -1617.86328  | -1617.78291  | 169.154     | 0.7696                | 5.89  | 2                                            | 12.6, 29.4                     |
| <b>4</b>            | 0                  | 2                 | $C_1$                   | -970.693729912 | 0.268676 | -970.425054      | -970.469342  | -970.408429  | 128.201     | 0.7670                | 3.36  | 2                                            | 39.4, 53.0                     |
| <b>5</b>            | 0                  | 2                 | $C_1$                   | -1293.65839634 | 0.265401 | -1293.392996     | -1293.439136 | -1293.375624 | 133.673     | 0.7675                | 2.94  | 5                                            | 20.1, 40.0                     |
| <b>6</b>            | 0                  | 2                 | $C_1$                   | -1233.75170597 | 0.291198 | -1233.460508     | -1233.511042 | -1233.440006 | 149.508     | 0.7679                | 3.17  | 1                                            | 32.7, 37.9                     |
| <b>7</b>            | 0                  | 2                 | $C_1$                   | -1277.96638644 | 0.362705 | -1277.603681     | -1277.654826 | -1277.581633 | 154.047     | 0.7686                | 3.67  | 2                                            | 30.6, 36.5                     |
| <b>8</b>            | 0                  | 2                 | $C_1$                   | -1667.2030796  | 0.563166 | -1666.639914     | -1666.707973 | -1666.606583 | 213.393     | 0.7690                | 3.57  | 2                                            | 13.5, 18.5                     |

<sup>a</sup> For different energy units, 1 Hartree = 627.5095 kcal mol<sup>-1</sup> = 27.2114 eV. <sup>b</sup> Charge. <sup>c</sup> Symmetry point group of the geometry. <sup>d</sup> In Cartesian coordinates.

## 10.1 Simulated UV-vis spectra

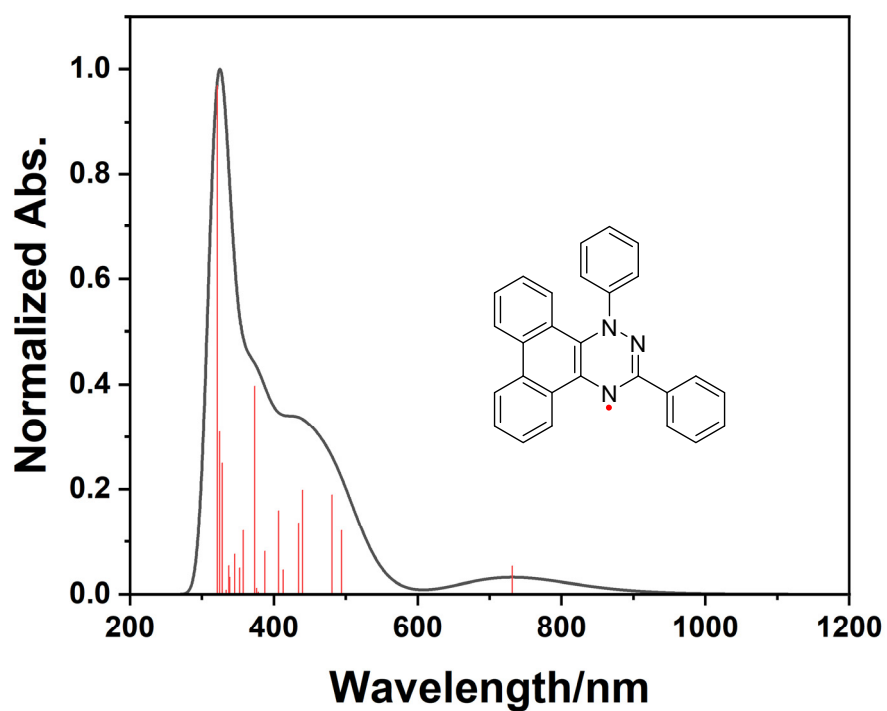

**Fig. S22.** TD-DFT(ub3lyp/6-31+g(d,p)/SMD)-computed UV-vis-NIR absorption spectrum of **1** in dichloromethane.

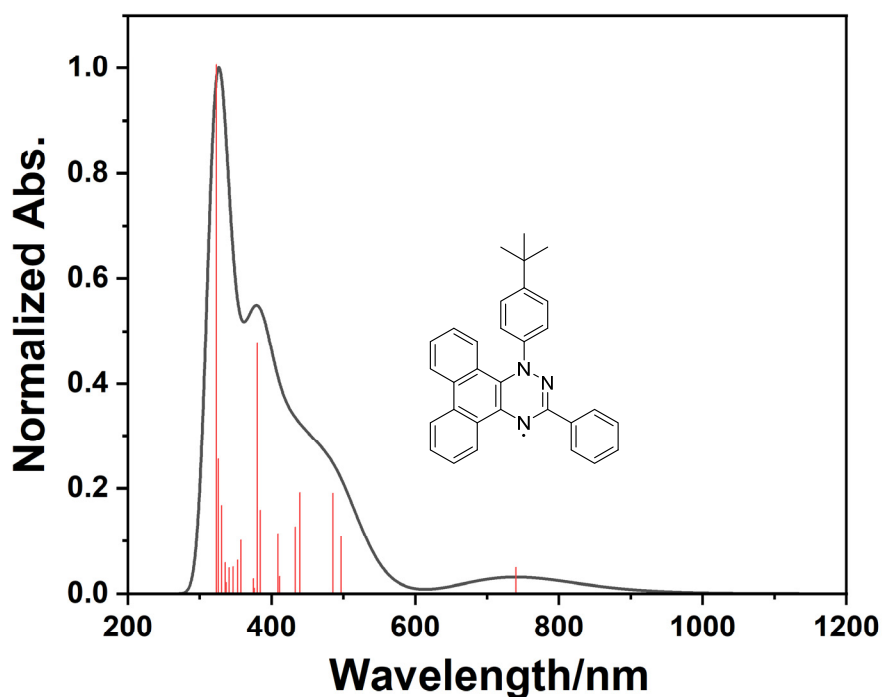

**Fig. S23.** TD-DFT(ub3lyp/6-31+g(d,p)/SMD)-computed UV-vis-NIR absorption spectrum of **1-tBu** in dichloromethane.

**Table S16.** Electronic transitions of **1** calculated at the TD-DFT(ub3lyp/6-31+g(d,p) level: main contribution,  $\langle S^2 \rangle$ , energies (eV), wavelength (nm), and oscillator strength ( $f$ ).

| Excited State | Main contribution                                                                                                                                                                    | $\langle S^2 \rangle$ | Energy[eV] | Wavelength[nm] | Osc. strength( $f$ ) |
|---------------|--------------------------------------------------------------------------------------------------------------------------------------------------------------------------------------|-----------------------|------------|----------------|----------------------|
| 1             | $\alpha$ -HOMO $\rightarrow\alpha$ -LUMO                                                                                                                                             | 0.813                 | 1.6951     | 731.41         | 0.0133               |
| 2             | $\beta$ -HOMO $\rightarrow\beta$ -LUMO<br>$\alpha$ -HOMO $\rightarrow\alpha$ -LUMO+1                                                                                                 | 0.868                 | 2.5103     | 493.90         | 0.0301               |
| 3             | $\alpha$ -HOMO $\rightarrow\alpha$ -LUMO+1<br>$\beta$ -HOMO $\rightarrow\beta$ -LUMO                                                                                                 | 0.854                 | 2.5787     | 480.80         | 0.0473               |
| 4             | $\beta$ -HOMO-1 $\rightarrow\beta$ -LUMO<br>$\alpha$ -HOMO $\rightarrow\alpha$ -LUMO+2                                                                                               | 1.317                 | 2.8197     | 439.70         | 0.0495               |
| 5             | $\alpha$ -HOMO $\rightarrow\alpha$ -LUMO+2<br>$\beta$ -HOMO-1 $\rightarrow\beta$ -LUMO                                                                                               | 1.073                 | 2.8560     | 434.12         | 0.0339               |
| 6             | $\beta$ -HOMO-5 $\rightarrow\beta$ -LUMO<br>$\beta$ -HOMO-6 $\rightarrow\beta$ -LUMO<br>$\beta$ -HOMO-3 $\rightarrow\beta$ -LUMO                                                     | 0.920                 | 3.0013     | 413.10         | 0.0114               |
| 7             | $\beta$ -HOMO-2 $\rightarrow\beta$ -LUMO<br>$\alpha$ -HOMO $\rightarrow\alpha$ -LUMO+2<br>$\alpha$ -HOMO $\rightarrow\alpha$ -LUMO+3<br>$\alpha$ -HOMO $\rightarrow\alpha$ -LUMO+4   | 1.199                 | 3.0485     | 406.71         | 0.0397               |
| 8             | $\alpha$ -HOMO $\rightarrow\alpha$ -LUMO+3<br>$\beta$ -HOMO-2 $\rightarrow\beta$ -LUMO<br>$\alpha$ -HOMO $\rightarrow\alpha$ -LUMO+4                                                 | 1.063                 | 3.2019     | 387.22         | 0.0203               |
| 9             | $\alpha$ -HOMO $\rightarrow\alpha$ -LUMO+3<br>$\alpha$ -HOMO $\rightarrow\alpha$ -LUMO+4                                                                                             | 1.334                 | 3.2767     | 378.38         | 0.0010               |
| 10            | $\alpha$ -HOMO $\rightarrow\alpha$ -LUMO+4<br>$\alpha$ -HOMO-1 $\rightarrow\alpha$ -LUMO+2                                                                                           | 2.068                 | 3.2973     | 376.02         | 0.0029               |
| 11            | $\alpha$ -HOMO $\rightarrow\alpha$ -LUMO+2<br>$\beta$ -HOMO-2 $\rightarrow\beta$ -LUMO                                                                                               | 1.594                 | 3.3223     | 373.18         | 0.0992               |
| 12            | $\beta$ -HOMO-3 $\rightarrow\beta$ -LUMO<br>$\alpha$ -HOMO $\rightarrow\alpha$ -LUMO+4                                                                                               | 0.999                 | 3.4702     | 357.28         | 0.0302               |
| 13            | $\alpha$ -HOMO-1 $\rightarrow\alpha$ -LUMO<br>$\alpha$ -HOMO $\rightarrow\alpha$ -LUMO+6                                                                                             | 1.937                 | 3.5206     | 352.17         | 0.0124               |
| 14            | $\alpha$ -HOMO $\rightarrow\alpha$ -LUMO+5<br>$\alpha$ -HOMO $\rightarrow\alpha$ -LUMO+6<br>$\beta$ -HOMO-1 $\rightarrow\beta$ -LUMO+2<br>$\alpha$ -HOMO-1 $\rightarrow\alpha$ -LUMO | 1.839                 | 3.5910     | 345.26         | 0.0189               |
| 15            | $\beta$ -HOMO-4 $\rightarrow\beta$ -LUMO<br>$\beta$ -HOMO-5 $\rightarrow\beta$ -LUMO                                                                                                 | 1.038                 | 3.6596     | 338.80         | 0.0080               |
| 16            | $\beta$ -HOMO-6 $\rightarrow\beta$ -LUMO<br>$\beta$ -HOMO-4 $\rightarrow\beta$ -LUMO<br>$\beta$ -HOMO-5 $\rightarrow\beta$ -LUMO                                                     | 0.987                 | 3.6778     | 337.12         | 0.0135               |
| 17            | $\alpha$ -HOMO $\rightarrow\alpha$ -LUMO+5<br>$\alpha$ -HOMO $\rightarrow\alpha$ -LUMO+6                                                                                             | 0.914                 | 3.7180     | 333.47         | 0.0020               |
| 18            | $\beta$ -HOMO $\rightarrow\beta$ -LUMO+1<br>$\beta$ -HOMO-3 $\rightarrow\beta$ -LUMO+1<br>$\alpha$ -HOMO-4 $\rightarrow\alpha$ -LUMO<br>$\beta$ -HOMO-4 $\rightarrow\beta$ -LUMO     | 2.235                 | 3.7760     | 328.34         | 0.0624               |
| 19            | $\beta$ -HOMO-1 $\rightarrow\beta$ -LUMO+2<br>$\beta$ -HOMO-2 $\rightarrow\beta$ -LUMO+1<br>$\beta$ -HOMO $\rightarrow\beta$ -LUMO+1                                                 | 1.956                 | 3.8209     | 324.49         | 0.0774               |
| 20            | $\alpha$ -HOMO-1 $\rightarrow\alpha$ -LUMO<br>$\beta$ -HOMO $\rightarrow\beta$ -LUMO+1                                                                                               | 1.349                 | 3.8603     | 321.18         | 0.2423               |

**Table S17.** Electronic transitions of **1-*t*Bu** calculated at the TD-DFT(ub3lyp/6-31+g(d,p) level: main contribution,  $\langle S^2 \rangle$ , energies (eV), wavelength (nm), and oscillator strength ( $f$ ).

| Excited State | Main contribution                                                                                                                      | $\langle S^2 \rangle$ | Energy[eV] | Wavelength[nm] | Osc. strength( $f$ ) |
|---------------|----------------------------------------------------------------------------------------------------------------------------------------|-----------------------|------------|----------------|----------------------|
| 1             | $\alpha$ -HOMO $\rightarrow\alpha$ -LUMO                                                                                               | 0.812                 | 1.6755     | 739.97         | 0.0136               |
| 2             | $\beta$ -HOMO $\rightarrow\beta$ -LUMO<br>$\alpha$ -HOMO $\rightarrow\alpha$ -LUMO+1                                                   | 0.874                 | 2.4954     | 496.84         | 0.0294               |
| 3             | $\alpha$ -HOMO $\rightarrow\alpha$ -LUMO+1<br>$\beta$ -HOMO $\rightarrow\beta$ -LUMO                                                   | 0.854                 | 2.5537     | 485.50         | 0.0521               |
| 4             | $\alpha$ -HOMO $\rightarrow\alpha$ -LUMO+2<br>$\beta$ -HOMO-1 $\rightarrow\beta$ -LUMO                                                 | 1.510                 | 2.8207     | 439.56         | 0.0523               |
| 5             | $\beta$ -HOMO-1 $\rightarrow\beta$ -LUMO<br>$\alpha$ -HOMO $\rightarrow\alpha$ -LUMO+2                                                 | 0.888                 | 2.8633     | 433.01         | 0.0345               |
| 6             | $\beta$ -HOMO-6 $\rightarrow\beta$ -LUMO<br>$\beta$ -HOMO-5 $\rightarrow\beta$ -LUMO<br>$\beta$ -HOMO-4 $\rightarrow\beta$ -LUMO       | 0.926                 | 3.0162     | 411.06         | 0.0090               |
| 7             | $\beta$ -HOMO-2 $\rightarrow\beta$ -LUMO<br>$\alpha$ -HOMO $\rightarrow\alpha$ -LUMO+3                                                 | 1.082                 | 3.0323     | 408.88         | 0.0311               |
| 8             | $\alpha$ -HOMO $\rightarrow\alpha$ -LUMO+3<br>$\beta$ -HOMO-3 $\rightarrow\beta$ -LUMO                                                 | 1.246                 | 3.2284     | 384.04         | 0.0432               |
| 9             | $\alpha$ -HOMO $\rightarrow\alpha$ -376.10 LUMO+2<br>$\beta$ -HOMO-2 $\rightarrow\beta$ -LUMO                                          | 1.627                 | 3.2604     | 380.27         | 0.1306               |
| 10            | $\beta$ -HOMO $\rightarrow\beta$ -LUMO+1<br>$\beta$ -HOMO-1 $\rightarrow\beta$ -LUMO+2                                                 | 2.345                 | 3.2965     | 376.10         | 0.0028               |
| 11            | $\alpha$ -HOMO $\rightarrow\alpha$ -LUMO+3                                                                                             | 0.898                 | 3.3081     | 374.79         | 0.0078               |
| 12            | $\beta$ -HOMO-3 $\rightarrow\beta$ -LUMO<br>$\alpha$ -HOMO $\rightarrow\alpha$ -LUMO+4                                                 | 1.060                 | 3.4699     | 357.32         | 0.0276               |
| 13            | $\alpha$ -HOMO $\rightarrow\alpha$ -LUMO+6<br>$\alpha$ -HOMO-1 $\rightarrow\alpha$ -LUMO<br>$\alpha$ -HOMO $\rightarrow\alpha$ -LUMO+5 | 1.771                 | 3.5151     | 352.71         | 0.0175               |
| 14            | $\alpha$ -HOMO $\rightarrow\alpha$ -LUMO+5<br>$\beta$ -HOMO-1 $\rightarrow\beta$ -LUMO+1<br>$\alpha$ -HOMO-1 $\rightarrow\alpha$ -LUMO | 1.966                 | 3.5808     | 346.25         | 0.0139               |
| 15            | $\beta$ -HOMO-5 $\rightarrow\beta$ -LUMO<br>$\beta$ -HOMO-6 $\rightarrow\beta$ -LUMO                                                   | 0.906                 | 3.6373     | 340.87         | 0.0134               |
| 16            | $\alpha$ -HOMO $\rightarrow\alpha$ -LUMO+5<br>$\beta$ -HOMO-5 $\rightarrow\beta$ -LUMO<br>$\alpha$ -HOMO $\rightarrow\beta$ -LUMO+6    | 1.118                 | 3.6820     | 336.73         | 0.0057               |
| 17            | $\alpha$ -HOMO $\rightarrow\alpha$ -LUMO+5<br>$\beta$ -HOMO-4 $\rightarrow\beta$ -LUMO                                                 | 1.177                 | 3.6957     | 335.48         | 0.0160               |
| 18            | $\beta$ -HOMO-4 $\rightarrow\beta$ -LUMO<br>$\beta$ -HOMO $\rightarrow\beta$ -LUMO+1                                                   | 2.000                 | 3.7520     | 330.45         | 0.0457               |
| 19            | $\beta$ -HOMO-1 $\rightarrow\beta$ -LUMO+2<br>$\beta$ -HOMO-1 $\rightarrow\beta$ -LUMO+1<br>$\beta$ -HOMO-2 $\rightarrow\beta$ -LUMO+1 | 1.960                 | 3.8069     | 325.69         | 0.0696               |
| 20            | $\alpha$ -HOMO-1 $\rightarrow\alpha$ -LUMO<br>$\beta$ -HOMO $\rightarrow\beta$ -LUMO+1                                                 | 1.324                 | 3.8349     | 323.30         | 0.2742               |

## 10.2 Molecular Orbitals

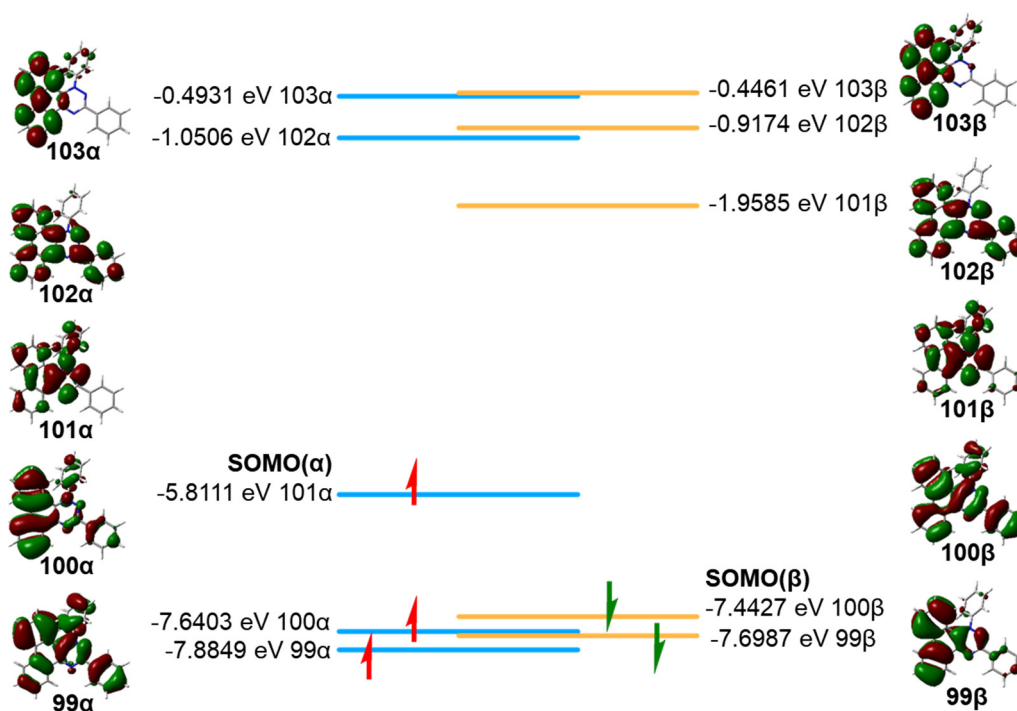

Fig. S24. Plots of the frontier molecular orbitals of **1** (Isovalue = 0.02 electron Bohr<sup>-3</sup>).

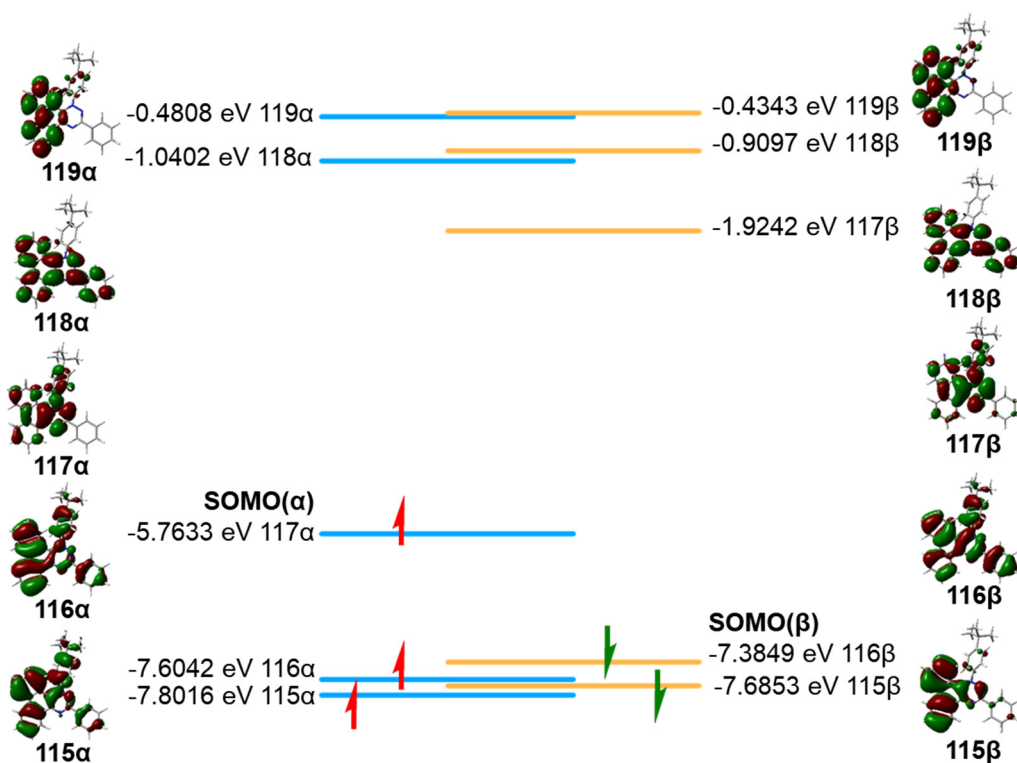

Fig. S25. Plots of the frontier molecular orbitals of **1-tBu** (Isovalue = 0.02 electron Bohr<sup>-3</sup>).

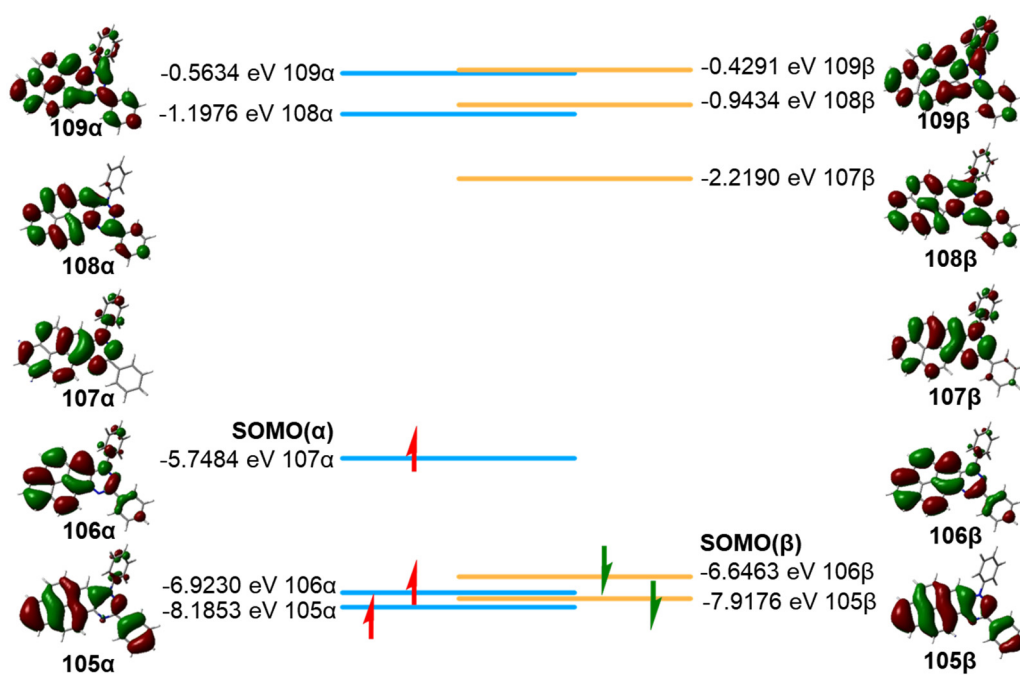

Fig. S26. Plots of the frontier molecular orbitals of **2** (Isovalue = 0.02 electron Bohr<sup>-3</sup>).

**Table S18.** The DFT (M06-2X-GD3/def2-TZVP//SMD) calculated frontier molecular orbitals of **Blatter** and **1–8** in dichloromethane.

| Species                | <b>Blatter</b> | <b>1</b> | <b>1-<i>t</i>Bu</b> | <b>2</b> | <b>3</b> | <b>4</b> | <b>5</b> | <b>6</b> | <b>7</b> | <b>8</b> |
|------------------------|----------------|----------|---------------------|----------|----------|----------|----------|----------|----------|----------|
| SOMO ( $\alpha$ ) (eV) | -5.9613        | -5.8110  | -5.7632             | -5.7484  | -5.9438  | -5.9278  | -5.9875  | -6.1567  | -5.8958  | -5.8483  |
| LUMO ( $\alpha$ ) (eV) | -0.6371        | -1.0505  | -1.0402             | -1.1976  | -1.0878  | -0.7816  | -0.7871  | -0.8966  | -0.7988  | -0.9529  |
| HOMO ( $\beta$ ) (eV)  | -7.6115        | -7.4427  | -7.3849             | -6.6463  | -7.3684  | -7.1267  | -6.8973  | -7.8105  | -6.9804  | -6.8928  |
| SUMO ( $\beta$ ) (eV)  | -1.9246        | -1.9585  | -1.9242             | -2.2190  | -2.1849  | -2.0767  | -2.1896  | -2.1304  | -2.1229  | -2.0127  |

### 10.3 Charge and Spin densities

**Table S19.** Mulliken atomic charge distributions and spin densities for **Blatter**, **1**, **1-*t*Bu** and **2–8** at the M06-2X-GD3/def2-TZVP (gas phase) level.

| <b>Blatter</b>                                                                    |           |                       |           | <b>1</b>                                                                           |           |                       |           |
|-----------------------------------------------------------------------------------|-----------|-----------------------|-----------|------------------------------------------------------------------------------------|-----------|-----------------------|-----------|
| 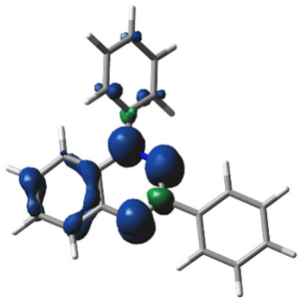 |           |                       |           |  |           |                       |           |
| <b>Charges</b>                                                                    |           | <b>Spin densities</b> |           | <b>Charges</b>                                                                     |           | <b>Spin densities</b> |           |
| 1N                                                                                | 0.04263   | 1N                    | 0.261726  | 1 N                                                                                | 0.044023  | 1 N                   | 0.284072  |
| 2N                                                                                | -0.288958 | 2N                    | 0.34128   | 2 N                                                                                | -0.287861 | 2 N                   | 0.267318  |
| 3C                                                                                | 0.228259  | 3C                    | -0.120701 | 3 C                                                                                | 0.243922  | 3 C                   | -0.102406 |
| 4N                                                                                | -0.319082 | 4N                    | 0.32385   | 4 N                                                                                | -0.376812 | 4 N                   | 0.307203  |
| 5C                                                                                | 0.182865  | 5C                    | -0.003107 | 5 C                                                                                | 0.249645  | 5 C                   | -0.034504 |
| 6C                                                                                | 0.067459  | 6C                    | 0.053621  | 6 C                                                                                | -0.050925 | 6 C                   | 0.162156  |
| 7C                                                                                | 0.209305  | 7C                    | -0.039506 | 7 C                                                                                | 0.083821  | 7 C                   | -0.045711 |
| 8C                                                                                | -0.088063 | 8C                    | 0.041096  | 8 C                                                                                | -0.013763 | 8 C                   | 0.04809   |
| 9C                                                                                | 0.033835  | 9C                    | -0.021009 | 9 C                                                                                | 0.03188   | 9 C                   | -0.029882 |
| 10C                                                                               | -0.007298 | 10C                   | 0.037074  | 10 C                                                                               | -0.009831 | 10 C                  | 0.054106  |
| 11C                                                                               | 0.022956  | 11C                   | -0.020696 | 11 C                                                                               | 0.026867  | 11 C                  | -0.031204 |
| 12C                                                                               | -0.026447 | 12C                   | 0.037109  | 12 C                                                                               | -0.005516 | 12 C                  | 0.058128  |
| 13C                                                                               | -0.039055 | 13C                   | -0.002036 | 13 C                                                                               | 0.014737  | 13 C                  | -0.043003 |
| 14C                                                                               | 0.004375  | 14C                   | 0.071689  | 14 C                                                                               | 0.089821  | 14 C                  | 0.049334  |
| 15C                                                                               | 0.005351  | 15C                   | 0.025337  | 15 C                                                                               | -0.063497 | 15 C                  | -0.026429 |
| 16C                                                                               | -0.062737 | 16C                   | 0.028189  | 16 C                                                                               | -0.020314 | 16 C                  | 0.054026  |
| 17C                                                                               | 0.071674  | 17C                   | 0.012619  | 17 C                                                                               | 0.014623  | 17 C                  | -0.031147 |
| 18C                                                                               | -0.03257  | 18C                   | -0.01707  | 18 C                                                                               | -0.006658 | 18 C                  | 0.054343  |
| 19C                                                                               | 0.008012  | 19C                   | 0.010772  | 19 C                                                                               | 0.109287  | 19 C                  | 0.000277  |
| 20C                                                                               | 0.002436  | 20C                   | -0.013346 | 20 C                                                                               | 0.000715  | 20 C                  | -0.00608  |
| 21C                                                                               | 0.001249  | 21C                   | 0.00907   | 21 C                                                                               | -0.037439 | 21 C                  | 0.010295  |
| 22C                                                                               | -0.016195 | 22C                   | -0.015961 | 22 C                                                                               | 0.012493  | 22 C                  | -0.000966 |
|                                                                                   |           |                       |           | 23 C                                                                               | -0.005456 | 23 C                  | 0.007624  |
|                                                                                   |           |                       |           | 24 C                                                                               | -0.07132  | 24 C                  | 0.000815  |
|                                                                                   |           |                       |           | 25 C                                                                               | 0.057407  | 25 C                  | 0.01657   |
|                                                                                   |           |                       |           | 26 C                                                                               | -0.023963 | 26 C                  | -0.01434  |
|                                                                                   |           |                       |           | 27 C                                                                               | 0.004267  | 27 C                  | 0.008998  |
|                                                                                   |           |                       |           | 28 C                                                                               | 0.00245   | 28 C                  | -0.011558 |
|                                                                                   |           |                       |           | 29 C                                                                               | 0.003275  | 29 C                  | 0.007882  |
|                                                                                   |           |                       |           | 30 C                                                                               | -0.015877 | 30 C                  | -0.014005 |

| 2                                                                                 |           |                |           | 3                                                                                 |           |                |           |                                                                                     |  |  |  |
|-----------------------------------------------------------------------------------|-----------|----------------|-----------|-----------------------------------------------------------------------------------|-----------|----------------|-----------|-------------------------------------------------------------------------------------|--|--|--|
| 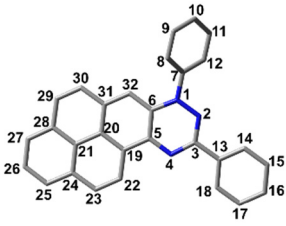 |           |                |           |  |           |                |           |  |  |  |  |
| Charges                                                                           |           | Spin densities |           | Charges                                                                           |           | Spin densities |           |                                                                                     |  |  |  |
| 1 N                                                                               | 0.056668  | 1 N            | 0.247717  | 1 N                                                                               | 0.054833  | 1 N            | 0.246288  |                                                                                     |  |  |  |
| 2 N                                                                               | -0.292194 | 2 N            | 0.311704  | 2 N                                                                               | -0.296732 | 2 N            | 0.350233  |                                                                                     |  |  |  |
| 3 C                                                                               | 0.221385  | 3 C            | -0.116449 | 3 C                                                                               | 0.223195  | 3 C            | -0.120557 |                                                                                     |  |  |  |
| 4 N                                                                               | -0.361723 | 4 N            | 0.315270  | 4 N                                                                               | -0.31581  | 4 N            | 0.314244  |                                                                                     |  |  |  |
| 5 C                                                                               | 0.242439  | 5 C            | -0.033388 | 5 C                                                                               | 0.226571  | 5 C            | -0.005467 |                                                                                     |  |  |  |
| 6 C                                                                               | 0.020067  | 6 C            | 0.077620  | 6 C                                                                               | 0.029771  | 6 C            | 0.02738   |                                                                                     |  |  |  |
| 7 C                                                                               | 0.212048  | 7 C            | -0.036073 | 7 C                                                                               | 0.20198   | 7 C            | -0.034046 |                                                                                     |  |  |  |
| 8 C                                                                               | -0.088788 | 8 C            | 0.037575  | 8 C                                                                               | -0.086709 | 8 C            | 0.03374   |                                                                                     |  |  |  |
| 9 C                                                                               | 0.033206  | 9 C            | -0.019080 | 9 C                                                                               | 0.036407  | 9 C            | -0.017049 |                                                                                     |  |  |  |
| 10 C                                                                              | -0.006101 | 10 C           | 0.033701  | 10 C                                                                              | -0.003478 | 10 C           | 0.030145  |                                                                                     |  |  |  |
| 11 C                                                                              | 0.022960  | 11 C           | -0.018732 | 11 C                                                                              | 0.023656  | 11 C           | -0.016998 |                                                                                     |  |  |  |
| 12 C                                                                              | -0.025021 | 12 C           | 0.033505  | 12 C                                                                              | -0.020463 | 12 C           | 0.030651  |                                                                                     |  |  |  |
| 13 C                                                                              | 0.070220  | 13 C           | 0.015433  | 13 C                                                                              | -0.057242 | 13 C           | 0.030611  |                                                                                     |  |  |  |
| 14 C                                                                              | -0.021560 | 14 C           | -0.015001 | 14 C                                                                              | 0.001459  | 14 C           | 0.047907  |                                                                                     |  |  |  |
| 15 C                                                                              | 0.003757  | 15 C           | 0.008904  | 15 C                                                                              | 0.189102  | 15 C           | 0.02243   |                                                                                     |  |  |  |
| 16 C                                                                              | 0.000183  | 16 C           | -0.013421 | 16 C                                                                              | -0.180584 | 16 C           | 0.043495  |                                                                                     |  |  |  |
| 17 C                                                                              | 0.006996  | 17 C           | 0.010573  | 17 C                                                                              | 0.07662   | 17 C           | 0.012054  |                                                                                     |  |  |  |
| 18 C                                                                              | -0.027678 | 18 C           | -0.016997 | 18 C                                                                              | -0.033047 | 18 C           | -0.017181 |                                                                                     |  |  |  |
| 19 C                                                                              | 0.025495  | 19 C           | 0.038105  | 19 C                                                                              | 0.008564  | 19 C           | 0.010804  |                                                                                     |  |  |  |
| 20 C                                                                              | 0.022130  | 20 C           | 0.002057  | 20 C                                                                              | 0.002411  | 20 C           | -0.013354 |                                                                                     |  |  |  |
| 21 C                                                                              | 0.032033  | 21 C           | 0.021942  | 21 C                                                                              | 0.002197  | 21 C           | 0.008969  |                                                                                     |  |  |  |
| 22 C                                                                              | -0.079356 | 22 C           | -0.006735 | 22 C                                                                              | -0.020142 | 22 C           | -0.015501 |                                                                                     |  |  |  |
| 23 C                                                                              | -0.023503 | 23 C           | 0.032667  | 23 N                                                                              | -0.24468  | 23 N           | -0.010327 |                                                                                     |  |  |  |
| 24 C                                                                              | 0.080250  | 24 C           | -0.009956 | 24 S                                                                              | 0.018996  | 24 S           | -0.008242 |                                                                                     |  |  |  |
| 25 C                                                                              | -0.049372 | 25 C           | 0.024831  | 25 C                                                                              | 0.136788  | 25 C           | 0.037629  |                                                                                     |  |  |  |
| 26 C                                                                              | 0.004996  | 26 C           | -0.009792 | 26 C                                                                              | 0.062018  | 26 C           | -0.012548 |                                                                                     |  |  |  |
| 27 C                                                                              | -0.042728 | 27 C           | 0.035447  | 27 C                                                                              | -0.034673 | 27 C           | 0.012774  |                                                                                     |  |  |  |
| 28 C                                                                              | 0.079855  | 28 C           | -0.016396 | 28 C                                                                              | -0.014085 | 28 C           | -0.007418 |                                                                                     |  |  |  |
| 29 C                                                                              | -0.053778 | 29 C           | 0.054534  | 29 C                                                                              | 0.012807  | 29 C           | 0.013715  |                                                                                     |  |  |  |
| 30 C                                                                              | -0.088331 | 30 C           | -0.039175 | 30 C                                                                              | 0.018184  | 30 C           | -0.007149 |                                                                                     |  |  |  |
| 31 C                                                                              | 0.106727  | 31 C           | 0.057696  | 31 C                                                                              | -0.017917 | 31 C           | 0.01277   |                                                                                     |  |  |  |
| 32 C                                                                              | -0.081280 | 32 C           | -0.008085 |                                                                                   |           |                |           |                                                                                     |  |  |  |

| 4                                                                                 |          |                |          | 5                                                                                   |           |                |           |
|-----------------------------------------------------------------------------------|----------|----------------|----------|-------------------------------------------------------------------------------------|-----------|----------------|-----------|
| 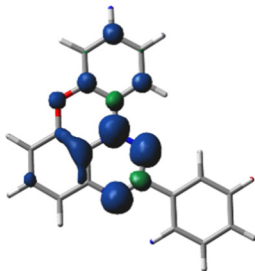 |          |                |          |  |           |                |           |
| Charges                                                                           |          | Spin densities |          | Charges                                                                             |           | Spin densities |           |
| 1 N                                                                               | 0.094327 | 1 N            | 0.262491 | 1 N                                                                                 | 0.069952  | 1 N            | 0.257867  |
| 2 N                                                                               | -0.32254 | 2 N            | 0.312183 | 2 N                                                                                 | -0.322431 | 2 N            | 0.319739  |
| 3 C                                                                               | 0.243403 | 3 C            | -0.10853 | 3 C                                                                                 | 0.245960  | 3 C            | -0.113781 |
| 4 N                                                                               | -0.31923 | 4 N            | 0.292314 | 4 N                                                                                 | -0.319217 | 4 N            | 0.303975  |
| 5 C                                                                               | 0.203216 | 5 C            | -0.00642 | 5 C                                                                                 | 0.196901  | 5 C            | -0.010938 |
| 6 C                                                                               | -0.0023  | 6 C            | 0.081037 | 6 C                                                                                 | 0.040613  | 6 C            | 0.077030  |
| 7 C                                                                               | 0.057422 | 7 C            | -0.06361 | 7 C                                                                                 | 0.116649  | 7 C            | -0.069865 |
| 8 C                                                                               | 0.217153 | 8 C            | 0.078324 | 8 C                                                                                 | -0.018564 | 8 C            | 0.075684  |
| 9 C                                                                               | -0.07168 | 9 C            | -0.04097 | 9 C                                                                                 | -0.004006 | 9 C            | -0.038638 |
| 10 C                                                                              | 0.020459 | 10 C           | 0.083229 | 10 C                                                                                | -0.004742 | 10 C           | 0.073065  |
| 11 C                                                                              | -0.00137 | 11 C           | -0.03759 | 11 C                                                                                | 0.004582  | 11 C           | -0.038769 |
| 12 C                                                                              | 0.026922 | 12 C           | 0.070364 | 12 C                                                                                | 0.020748  | 12 C           | 0.069773  |
| 13 C                                                                              | 0.199103 | 13 C           | 0.010056 | 13 C                                                                                | -0.021760 | 13 C           | -0.002062 |
| 14 C                                                                              | -0.07629 | 14 C           | 0.024773 | 14 C                                                                                | -0.013088 | 14 C           | 0.050247  |
| 15 C                                                                              | 0.04847  | 15 C           | 0.031774 | 15 C                                                                                | 0.021719  | 15 C           | 0.017022  |
| 16 C                                                                              | -0.09603 | 16 C           | -0.00492 | 16 C                                                                                | -0.083802 | 16 C           | 0.013304  |
| 17 C                                                                              | 0.059479 | 17 C           | 0.010619 | 17 C                                                                                | 0.075538  | 17 C           | 0.011566  |
| 18 C                                                                              | -0.02823 | 18 C           | -0.01442 | 18 C                                                                                | -0.029455 | 18 C           | -0.015332 |
| 19 C                                                                              | 0.009251 | 19 C           | 0.009224 | 19 C                                                                                | 0.009127  | 19 C           | 0.009409  |
| 20 C                                                                              | 0.003125 | 20 C           | -0.01069 | 20 C                                                                                | 0.004659  | 20 C           | -0.011753 |
| 21 C                                                                              | 0.000444 | 21 C           | 0.007321 | 21 C                                                                                | -0.001980 | 21 C           | 0.007644  |
| 22 C                                                                              | -0.00816 | 22 C           | -0.01326 | 22 C                                                                                | -0.015482 | 22 C           | -0.013600 |
| 23 O                                                                              | -0.25695 | 23 O           | 0.026701 | 23 S                                                                                | 0.028081  | 23 S           | 0.028414  |

| 6                                                                                 |           |                |           | 7                                                                                   |           |                |           |
|-----------------------------------------------------------------------------------|-----------|----------------|-----------|-------------------------------------------------------------------------------------|-----------|----------------|-----------|
| 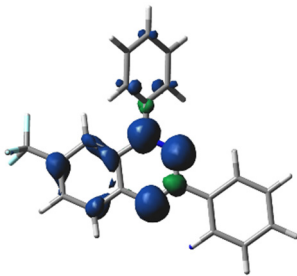 |           |                |           |  |           |                |           |
| Charges                                                                           |           | Spin densities |           | Charges                                                                             |           | Spin densities |           |
| 1N                                                                                | 0.049637  | 1N             | 0.269128  | 1N                                                                                  | 0.076793  | 1N             | 0.270877  |
| 2N                                                                                | -0.287504 | 2N             | 0.336553  | 2N                                                                                  | -0.345494 | 2N             | 0.293772  |
| 3C                                                                                | 0.234281  | 3C             | -0.114073 | 3C                                                                                  | 0.257343  | 3C             | -0.102517 |
| 4N                                                                                | -0.320497 | 4N             | 0.318331  | 4N                                                                                  | -0.322465 | 4N             | 0.290321  |
| 5C                                                                                | 0.195003  | 5C             | -0.017021 | 5C                                                                                  | 0.197855  | 5C             | -0.01147  |
| 6C                                                                                | 0.059988  | 6C             | 0.049664  | 6C                                                                                  | 0.003706  | 6C             | 0.083834  |
| 7C                                                                                | 0.208716  | 7C             | -0.038546 | 7C                                                                                  | 0.018916  | 7C             | -0.07592  |
| 8C                                                                                | -0.021367 | 8C             | 0.035765  | 8C                                                                                  | 0.266678  | 8C             | 0.101065  |
| 9C                                                                                | 0.025617  | 9C             | -0.019851 | 9C                                                                                  | -0.109944 | 9C             | -0.043558 |
| 10C                                                                               | -0.001577 | 10C            | 0.035676  | 10C                                                                                 | -0.039655 | 10C            | 0.070359  |
| 11C                                                                               | 0.039153  | 11C            | -0.020393 | 11C                                                                                 | 0.080684  | 11C            | -0.028488 |
| 12C                                                                               | -0.088112 | 12C            | 0.039616  | 12C                                                                                 | 0.091735  | 12C            | 0.058891  |
| 13C                                                                               | -0.025133 | 13C            | 0.025914  | 13C                                                                                 | 0.202177  | 13C            | 0.006051  |
| 14C                                                                               | -0.029333 | 14C            | 0.071751  | 14C                                                                                 | -0.084557 | 14C            | 0.025818  |
| 15C                                                                               | -0.007299 | 15C            | 0.002963  | 15C                                                                                 | 0.053417  | 15C            | 0.023657  |
| 16C                                                                               | -0.051267 | 16C            | 0.037092  | 16C                                                                                 | -0.099976 | 16C            | 0.00032   |
| 17C                                                                               | 0.073655  | 17C            | 0.010732  | 17C                                                                                 | 0.078045  | 17C            | 0.009059  |
| 18C                                                                               | -0.029553 | 18C            | -0.015515 | 18C                                                                                 | -0.033435 | 18C            | -0.013074 |
| 19C                                                                               | 0.010178  | 19C            | 0.009899  | 19C                                                                                 | 0.012117  | 19C            | 0.008443  |
| 20C                                                                               | 0.006264  | 20C            | -0.011699 | 20C                                                                                 | 0.002576  | 20C            | -0.009681 |
| 21C                                                                               | 0.004305  | 21C            | 0.007879  | 21C                                                                                 | -0.007478 | 21C            | 0.006347  |
| 22C                                                                               | -0.015499 | 22C            | -0.013747 | 22C                                                                                 | -0.008552 | 22C            | -0.011339 |
| 23C                                                                               | 0.508275  | 23C            | -0.002278 | 23C                                                                                 | -0.048735 | 23C            | -0.014574 |
| 24F                                                                               | -0.180329 | 24F            | -0.000075 | 24C                                                                                 | -0.058427 | 24C            | 0.028215  |
| 25F                                                                               | -0.178441 | 25F            | 0.001366  | 25C                                                                                 | 0.103737  | 25C            | -0.01349  |
| 26F                                                                               | -0.179161 | 26F            | 0.000869  | 26C                                                                                 | -0.049973 | 26C            | 0.00607   |
|                                                                                   |           |                |           | 27C                                                                                 | 0.000029  | 27C            | -0.007229 |
|                                                                                   |           |                |           | 28C                                                                                 | -0.007557 | 28C            | 0.007977  |
|                                                                                   |           |                |           | 29C                                                                                 | -0.079124 | 29C            | -0.006342 |
|                                                                                   |           |                |           | 30C                                                                                 | 0.109524  | 30C            | 0.015612  |
|                                                                                   |           |                |           | 31O                                                                                 | -0.259959 | 31O            | 0.03099   |

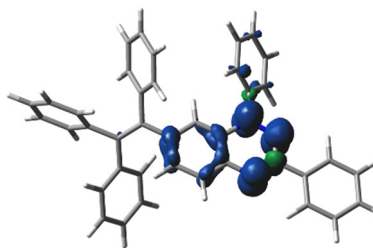

| Charges |           | Spin densities |           |
|---------|-----------|----------------|-----------|
| 1N      | 0.052084  | 1N             | 0.255934  |
| 2N      | -0.296369 | 2N             | 0.327022  |
| 3C      | 0.234176  | 3C             | -0.117275 |
| 4N      | -0.31934  | 4N             | 0.317491  |
| 5C      | 0.21641   | 5C             | -0.013236 |
| 6C      | 0.05121   | 6C             | 0.05278   |
| 7C      | 0.215184  | 7C             | -0.04118  |
| 8C      | -0.083649 | 8C             | 0.045217  |
| 9C      | 0.026592  | 9C             | -0.023382 |
| 10C     | -0.004553 | 10C            | 0.040698  |
| 11C     | 0.020072  | 11C            | -0.022584 |
| 12C     | -0.029703 | 12C            | 0.04024   |
| 13C     | -0.056892 | 13C            | 0.00618   |
| 14C     | -0.050757 | 14C            | 0.093131  |
| 15C     | 0.049453  | 15C            | -0.005437 |
| 16C     | -0.081398 | 16C            | 0.037723  |
| 17C     | 0.06973   | 17C            | 0.012394  |
| 18C     | -0.032927 | 18C            | -0.016621 |
| 19C     | 0.006495  | 19C            | 0.010486  |
| 20C     | 0.00173   | 20C            | -0.013123 |
| 21C     | 0.000472  | 21C            | 0.008837  |
| 22C     | -0.018219 | 22C            | -0.01539  |
| 23C     | 0.081841  | 23C            | -0.006018 |
| 24C     | -0.046632 | 24C            | -0.002133 |
| 25C     | -0.005649 | 25C            | -0.000392 |
| 26C     | 0.003485  | 26C            | -0.001205 |
| 27C     | 0.000912  | 27C            | 0.000569  |
| 28C     | 0.029659  | 28C            | -0.001202 |
| 29C     | 0.10406   | 29C            | 0.01445   |
| 30C     | -0.072414 | 30C            | -0.002182 |
| 31C     | 0.032854  | 31C            | 0.003208  |
| 32C     | -0.005739 | 32C            | -0.001576 |
| 33C     | 0.004153  | 33C            | 0.003385  |
| 34C     | -0.004245 | 34C            | -0.001954 |
| 35C     | 0.00256   | 35C            | 0.002778  |
| 36C     | -0.08751  | 36C            | 0.005379  |
| 37C     | 0.000802  | 37C            | 0.004025  |
| 38C     | -0.00196  | 38C            | -0.001444 |
| 39C     | 0.007707  | 39C            | 0.00532   |
| 40C     | -0.004231 | 40C            | -0.001831 |

|     |           |     |           |
|-----|-----------|-----|-----------|
| 41C | 0.037238  | 41C | 0.001443  |
| 42C | -0.046692 | 42C | -0.000525 |

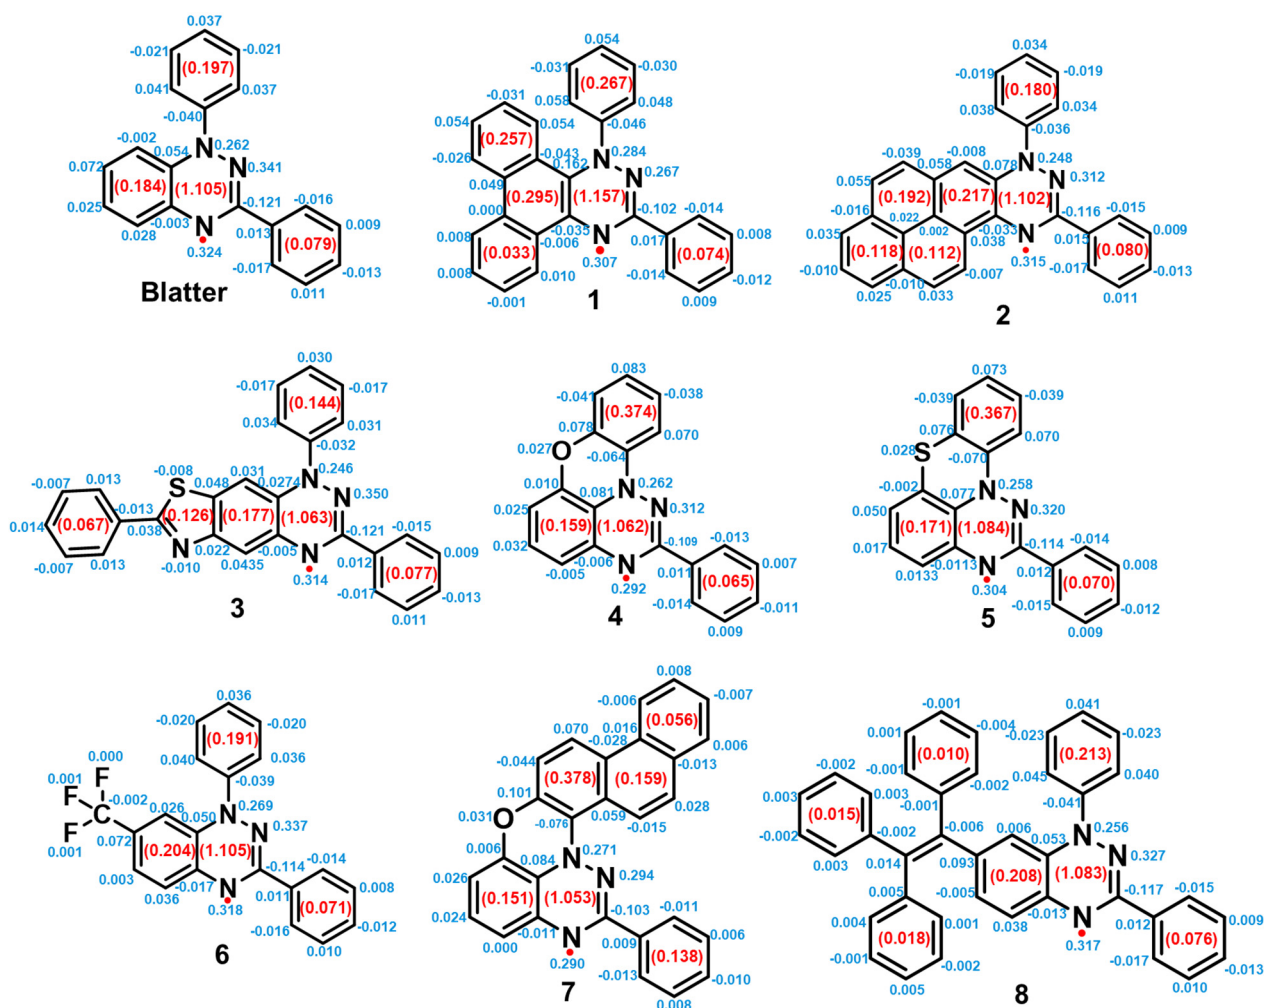

**Fig. S27.** DFT(M06-2X-GD3/def2-TZVP) calculated spin populations on atoms (blue numbers) and summed values of six atoms on the rings (red numbers in parentheses) for the studied radicals.

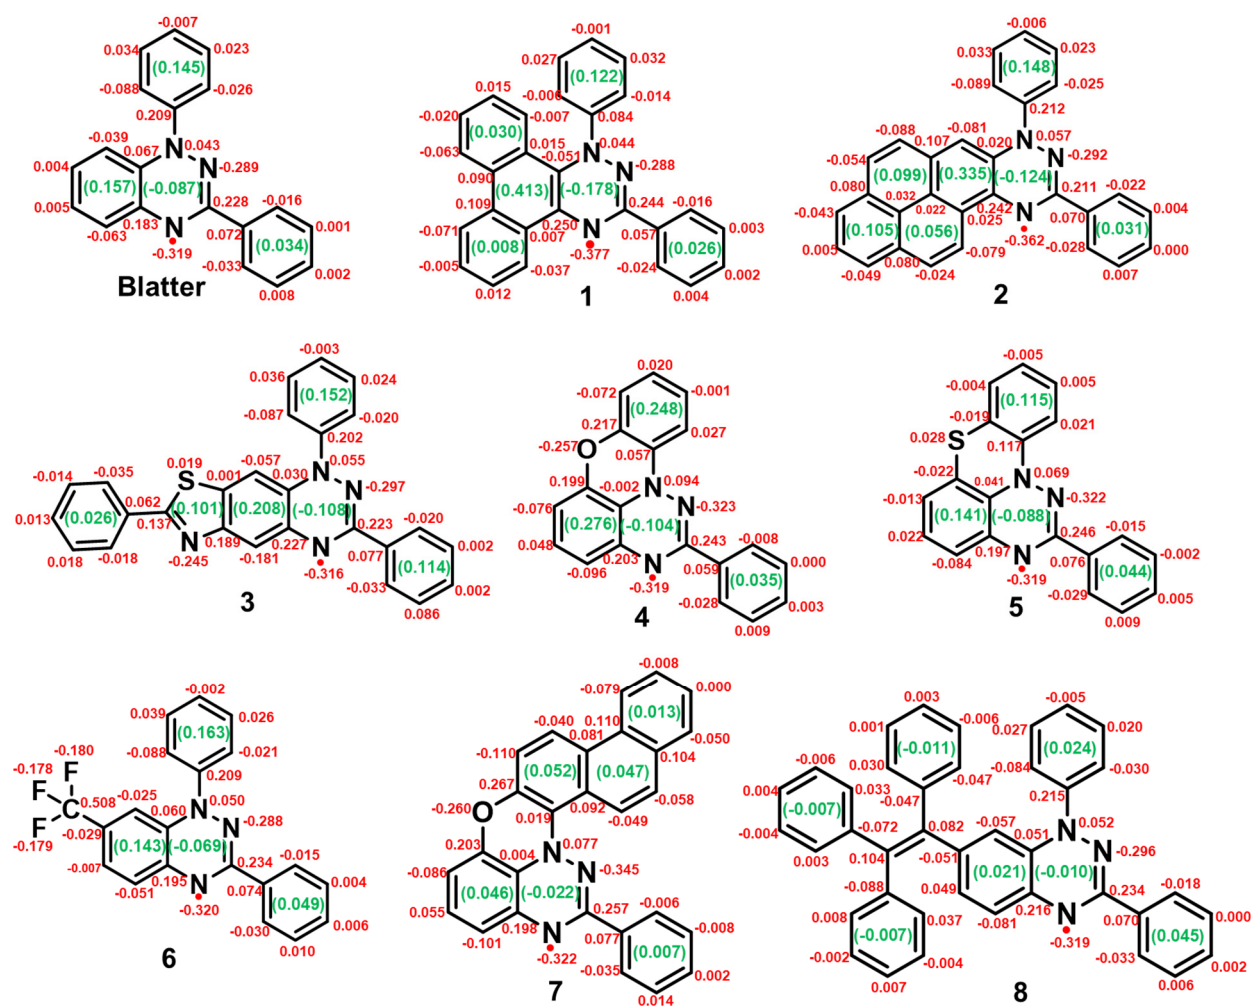

**Fig. S28.** DFT(M06-2X-GD3/def2-TZVP) calculated Mulliken charges on atoms (red numbers) and the summed values of six atoms on the ring (green numbers in parentheses) for the studied radicals.

## 10.4 Electrochemical Gaps Calculations

**Table S20.** The DFT (M06-2X-GD3/def2-TZVP//SMD M06-2X-GD3/def2-TZVP) calculations for the redox potentials of **Blatter** and **1–8**: energies ( $E^\circ$ , hartree), zero-point vibrational energies (ZPVE, hartree), thermal correction to energies (TC-E, hartree), total electronic and thermal energies ( $U$ , hartree, 298 K), dipole moment (total,  $\mu$ , Debye), imaginary and lowest vibrational frequencies ( $\text{cm}^{-1}$ ), relative electronic and thermal energies (Rel. U, hartree), the gas-phase ionization potentials ( $IP_{\text{gas}}$ , eV), the gas-phase electron affinities ( $EA_{\text{gas}}$ , eV), the solvation free energies of the neutral species ( $\Delta G_{\text{sol}}(\text{neut})$ , eV), the solvation free energies of the cations ( $\Delta G_{\text{sol}}(\text{cat.})$ , eV), the solvation free energies of the anions ( $\Delta G_{\text{sol}}(\text{anion})_0$ , eV), The differential solvation stabilization energy ( $\Delta\Delta G_{\text{sol}}$ , eV), the free energies of the oxidation ( $\Delta G_{\text{ox}}$ , hartree) and reduction reactions ( $\Delta G_{\text{red}}$ , hartree), thermodynamic oxidation ( $E_{\text{ox}}$ , eV) and reduction ( $E_{\text{red}}$ , eV) potentials, and the electrochemical gaps ( $E_{\text{gap}}^{\text{Calc}}$ , eV).<sup>a</sup>

| Species        | Task <sup>b</sup> | State   | Medium    | Chrg. <sup>c</sup> | Spin Multiplicity | Point grp. <sup>d</sup> | $E^\circ$      | ZPVE     | TC-E     | H (298 K)    | <S <sup>2</sup> > | $\mu$ | RMS Gradt. <sup>e</sup> ( $\times 10^{-6}$ ) | Lowest Vibrational Frequencies | $IP_{\text{gas}}$ | $EA_{\text{gas}}$ | $\Delta G_{\text{sol}}$ (Neut.) | $\Delta G_{\text{sol}}$ (Cat.) | $\Delta G_{\text{sol}}$ (Anion) | $\Delta\Delta G_{\text{sol}}$ | $\Delta G_{\text{ox}}^0$ | $\Delta G_{\text{red}}^0$ | $E_{\text{ox}}$ | $E_{\text{red}}$ | $E_{\text{gap}}^{\text{Calc}}$ |
|----------------|-------------------|---------|-----------|--------------------|-------------------|-------------------------|----------------|----------|----------|--------------|-------------------|-------|----------------------------------------------|--------------------------------|-------------------|-------------------|---------------------------------|--------------------------------|---------------------------------|-------------------------------|--------------------------|---------------------------|-----------------|------------------|--------------------------------|
| <b>Blatter</b> | Basic Opt.        | Neutral | Gas Phase | 0                  | 2                 | C <sub>1</sub>          | -896.629570596 | 0.285481 | 0.302555 | -896.327960  | 0.7691            | 3.10  | 1                                            | 30.0, 37.6                     | 6.222             | 1.834             | -0.7917                         | -2.2877                        | -2.2998                         | 3.004                         | 0.1737                   | -0.1228                   | 4.726           | 3.343            | 1.383                          |
|                | SPE <sup>f</sup>  | Neutral | DCM       | 0                  | 2                 | C <sub>1</sub>          | -896.658666471 | /        | /        | /            | /                 | /     | /                                            | /                              |                   |                   |                                 |                                |                                 |                               |                          |                           |                 |                  |                                |
|                | SPE <sup>f</sup>  | Cation  | Gas Phase | +1                 | 0                 | C <sub>1</sub>          | -896.394157354 | /        | /        | /            | /                 | /     | /                                            | /                              |                   |                   |                                 |                                |                                 |                               |                          |                           |                 |                  |                                |
|                | SPE <sup>f</sup>  | Anion   | Gas Phase | -1                 | 0                 | C <sub>1</sub>          | -896.680943289 | /        | /        | /            | /                 | /     | /                                            | /                              |                   |                   |                                 |                                |                                 |                               |                          |                           |                 |                  |                                |
|                | Basic Opt.        | Cation  | Gas Phase | +1                 | 0                 | C <sub>1</sub>          | -896.402563017 | 0.287238 | 0.303251 | -896.099312  | /                 | 4.86  | 3                                            | 27.6, 34.5                     |                   |                   |                                 |                                |                                 |                               |                          |                           |                 |                  |                                |
|                | SPE <sup>g</sup>  | Cation  | DCM       | +1                 | 0                 | C <sub>1</sub>          | -896.486637382 | /        | /        | /            | /                 | /     | /                                            | /                              |                   |                   |                                 |                                |                                 |                               |                          |                           |                 |                  |                                |
|                | Basic Opt.        | Anion   | Gas Phase | -1                 | 0                 | C <sub>1</sub>          | -896.695079588 | 0.283506 | 0.299699 | -896.39538   | /                 | 1.45  | 2                                            | 26.6, 44.2                     |                   |                   |                                 |                                |                                 |                               |                          |                           |                 |                  |                                |
|                | SPE <sup>h</sup>  | Anion   | DCM       | -1                 | 0                 | C <sub>1</sub>          | -896.779596196 | /        | /        | /            | /                 | /     | /                                            | /                              |                   |                   |                                 |                                |                                 |                               |                          |                           |                 |                  |                                |
| <b>1</b>       | Basic Opt.        | Neutral | Gas Phase | 0                  | 2                 | C <sub>1</sub>          | -1203.90210572 | 0.380086 | 0.401556 | -1203.500550 | 0.7680            | 2.49  | 5                                            | 20.9, 26.7                     | 5.855             | 2.065             | -0.9878                         | -2.3283                        | -2.4070                         | 2.760                         | 0.1659                   | -0.1280                   | 4.514           | 3.484            | 1.030                          |
|                | SPE <sup>f</sup>  | Neutral | DCM       | 0                  | 2                 | C <sub>1</sub>          | -1203.93840764 | /        | /        | /            | /                 | /     | /                                            | /                              |                   |                   |                                 |                                |                                 |                               |                          |                           |                 |                  |                                |
|                | SPE <sup>f</sup>  | Cation  | Gas Phase | +1                 | 0                 | C <sub>1</sub>          | -1203.67758707 | /        | /        | /            | /                 | /     | /                                            | /                              |                   |                   |                                 |                                |                                 |                               |                          |                           |                 |                  |                                |
|                | SPE <sup>f</sup>  | Anion   | Gas Phase | -1                 | 0                 | C <sub>1</sub>          | -1203.96031803 | /        | /        | /            | /                 | /     | /                                            | /                              |                   |                   |                                 |                                |                                 |                               |                          |                           |                 |                  |                                |
|                | Basic Opt.        | Cation  | Gas Phase | +1                 | 0                 | C <sub>1</sub>          | -1203.68938388 | 0.382740 | 0.403990 | -1203.285394 | /                 | 3.05  | 4                                            | 25.7, 36.8                     |                   |                   |                                 |                                |                                 |                               |                          |                           |                 |                  |                                |
|                | SPE <sup>g</sup>  | Cation  | DCM       | +1                 | 0                 | C <sub>1</sub>          | -1203.77494999 | /        | /        | /            | /                 | /     | /                                            | /                              |                   |                   |                                 |                                |                                 |                               |                          |                           |                 |                  |                                |
|                | Basic Opt.        | Anion   | Gas Phase | -1                 | 0                 | C <sub>1</sub>          | -1203.97628232 | 0.378339 | 0.399861 | -1203.576421 | /                 | 2.11  | 7                                            | 28.6, 33.3                     |                   |                   |                                 |                                |                                 |                               |                          |                           |                 |                  |                                |
|                | SPE <sup>h</sup>  | Anion   | DCM       | -1                 | 0                 | C <sub>1</sub>          | -1204.06473535 | /        | /        | /            | /                 | /     | /                                            | /                              |                   |                   |                                 |                                |                                 |                               |                          |                           |                 |                  |                                |
| <b>2</b>       | Basic Opt.        | Neutral | Gas Phase | 0                  | 2                 | C <sub>1</sub>          | -1280.13975331 | 0.393169 | 0.415218 | -1279.724536 | 0.7741            | 2.72  | 2                                            | 28.3, 39.0                     | 5.931             | 2.150             | -1.0691                         | -2.3573                        | -2.3646                         | 2.584                         | 0.1706                   | -0.1266                   | 4.643           | 3.446            | 1.197                          |
|                | SPE <sup>f</sup>  | Neutral | DCM       | 0                  | 2                 | C <sub>1</sub>          | -1280.17904091 | /        | /        | /            | /                 | /     | /                                            | /                              |                   |                   |                                 |                                |                                 |                               |                          |                           |                 |                  |                                |
|                | SPE <sup>f</sup>  | Cation  | Gas Phase | +1                 | 0                 | C <sub>1</sub>          | -1279.9167763  | /        | /        | /            | /                 | /     | /                                            | /                              |                   |                   |                                 |                                |                                 |                               |                          |                           |                 |                  |                                |
|                | SPE <sup>f</sup>  | Anion   | Gas Phase | -1                 | 0                 | C <sub>1</sub>          | -1280.20646305 | /        | /        | /            | /                 | /     | /                                            | /                              |                   |                   |                                 |                                |                                 |                               |                          |                           |                 |                  |                                |
|                | Basic Opt.        | Cation  | Gas Phase | +1                 | 0                 | C <sub>1</sub>          | -1279.92354827 | 0.395049 | 0.416989 | -1279.506560 | /                 | 3.23  | 2                                            | 25.0, 36.8                     |                   |                   |                                 |                                |                                 |                               |                          |                           |                 |                  |                                |
|                | SPE <sup>g</sup>  | Cation  | DCM       | +1                 | 0                 | C <sub>1</sub>          | -1280.01017938 | /        | /        | /            | /                 | /     | /                                            | /                              |                   |                   |                                 |                                |                                 |                               |                          |                           |                 |                  |                                |
|                | Basic Opt.        | Anion   | Gas Phase | -1                 | 0                 | C <sub>1</sub>          | -1280.21630481 | 0.390458 | 0.412742 | -1279.803563 | /                 | 0.61  | 1                                            | 19.4, 30.4                     |                   |                   |                                 |                                |                                 |                               |                          |                           |                 |                  |                                |
|                | SPE <sup>h</sup>  | Anion   | DCM       | -1                 | 0                 | C <sub>1</sub>          | -1280.30320354 | /        | /        | /            | /                 | /     | /                                            | /                              |                   |                   |                                 |                                |                                 |                               |                          |                           |                 |                  |                                |
| <b>3</b>       | Basic Opt.        | Neutral | Gas Phase | 0                  | 2                 | C <sub>1</sub>          | -1618.13701304 | 0.369144 | 0.392225 | -1617.744788 | 0.7705            | 4.03  | 1                                            | 25.1, 29.9                     | 6.072             | 2.070             | -1.0495                         | -2.3401                        | -2.4147                         | 2.656                         | 0.1757                   | -0.1263                   | 4.781           | 3.435            | 1.346                          |
|                | SPE <sup>f</sup>  | Neutral | DCM       | 0                  | 2                 | C <sub>1</sub>          | -1618.17558221 | /        | /        | /            | /                 | /     | /                                            | /                              |                   |                   |                                 |                                |                                 |                               |                          |                           |                 |                  |                                |

Continued from previous page ...

| Species | Task <sup>b</sup> | State   | Medium    | Chrg. <sup>c</sup> | Spin Multiplicity | Point grp. <sup>d</sup> | $E^{\circ}$    | ZPVE     | TC-E     | H (298 K)    | $\langle S^2 \rangle$ | $\mu$ | RMS Gradt. <sup>e</sup> ( $\times 10^{-6}$ ) | Lowest Vibrational Frequencies | $IP_{\text{gas}}$ | $EA_{\text{gas}}$ | $\Delta G_{\text{sol}}$ (Neut.) | $\Delta G_{\text{sol}}$ (Cat.) | $\Delta G_{\text{sol}}$ (Anion) | $\Delta \Delta G_{\text{sol}}$ | $\Delta G_{\text{ox}}^0$ | $\Delta G_{\text{ox}}^0$ | $E_{\text{ox}}$ | $E_{\text{red}}$ | $E_{\text{gap}}^{\text{Calc}}$ |
|---------|-------------------|---------|-----------|--------------------|-------------------|-------------------------|----------------|----------|----------|--------------|-----------------------|-------|----------------------------------------------|--------------------------------|-------------------|-------------------|---------------------------------|--------------------------------|---------------------------------|--------------------------------|--------------------------|--------------------------|-----------------|------------------|--------------------------------|
|         | SPE <sup>f</sup>  | Cation  | Gas Phase | +1                 | 0                 | C <sub>1</sub>          | -1617.90759625 | /        | /        | /            | /                     | /     | /                                            | /                              |                   |                   |                                 |                                |                                 |                                |                          |                          |                 |                  |                                |
|         | SPE <sup>f</sup>  | Anion   | Gas Phase | -1                 | 0                 | C <sub>1</sub>          | -1618.20105354 | /        | /        | /            | /                     | /     | /                                            | /                              |                   |                   |                                 |                                |                                 |                                |                          |                          |                 |                  |                                |
|         | Basic Opt.        | Cation  | Gas Phase | +1                 | 0                 | C <sub>1</sub>          | -1617.91528238 | 0.370697 | 0.393622 | -1617.521661 | /                     | 3.95  | 5                                            | 26.4, 31.4                     |                   |                   |                                 |                                |                                 |                                |                          |                          |                 |                  |                                |
|         | SPE <sup>g</sup>  | Cation  | DCM       | +1                 | 0                 | C <sub>1</sub>          | -1618.00127906 | /        | /        | /            | /                     | /     | /                                            | /                              |                   |                   |                                 |                                |                                 |                                |                          |                          |                 |                  |                                |
|         | Basic Opt.        | Anion   | Gas Phase | -1                 | 0                 | C <sub>1</sub>          | -1618.21121528 | 0.367066 | 0.390349 | -1617.820866 | /                     | 5.74  | 3                                            | 18.9, 22.2                     |                   |                   |                                 |                                |                                 |                                |                          |                          |                 |                  |                                |
|         | SPE <sup>h</sup>  | Anion   | DCM       | -1                 | 0                 | C <sub>1</sub>          | -1618.2999562  | /        | /        | /            | /                     | /     | /                                            | /                              |                   |                   |                                 |                                |                                 |                                |                          |                          |                 |                  |                                |
| 4       | Basic Opt.        | Neutral | Gas Phase | 0                  | 2                 | C <sub>1</sub>          | -970.666466347 | 0.268584 | 0.284366 | -970.382100  | 0.7678                | 2.25  | 2                                            | 19.7, 48.0                     | 6.286             | 1.829             | -0.7382                         | -2.2495                        | -2.2406                         | 3.014                          | 0.1755                   | -0.1224                  | 4.775           | 3.331            | 1.444                          |
|         | SPE <sup>f</sup>  | Neutral | DCM       | 0                  | 2                 | C <sub>1</sub>          | -970.693593759 | /        | /        | /            | /                     | /     | /                                            | /                              |                   |                   |                                 |                                |                                 |                                |                          |                          |                 |                  |                                |
|         | SPE <sup>f</sup>  | Cation  | Gas Phase | +1                 | 0                 | C <sub>1</sub>          | -970.430521381 | /        | /        | /            | /                     | /     | /                                            | /                              |                   |                   |                                 |                                |                                 |                                |                          |                          |                 |                  |                                |
|         | SPE <sup>f</sup>  | Anion   | Gas Phase | -1                 | 0                 | C <sub>1</sub>          | -970.724087958 | /        | /        | /            | /                     | /     | /                                            | /                              |                   |                   |                                 |                                |                                 |                                |                          |                          |                 |                  |                                |
|         | Basic Opt.        | Cation  | Gas Phase | +1                 | 0                 | C <sub>1</sub>          | -970.437284441 | 0.270635 | 0.286205 | -970.151079  | /                     | 3.78  | 4                                            | 21.9, 48.0                     |                   |                   |                                 |                                |                                 |                                |                          |                          |                 |                  |                                |
|         | SPE <sup>g</sup>  | Cation  | DCM       | +1                 | 0                 | C <sub>1</sub>          | -970.519953238 | /        | /        | /            | /                     | /     | /                                            | /                              |                   |                   |                                 |                                |                                 |                                |                          |                          |                 |                  |                                |
|         | Basic Opt.        | Anion   | Gas Phase | -1                 | 0                 | C <sub>1</sub>          | -970.730994084 | 0.265446 | 0.281685 | -970.449309  | /                     | 1.54  | 3                                            | 25.0, 41.9                     |                   |                   |                                 |                                |                                 |                                |                          |                          |                 |                  |                                |
|         | SPE <sup>h</sup>  | Anion   | DCM       | -1                 | 0                 | C <sub>1</sub>          | -970.813335003 | /        | /        | /            | /                     | /     | /                                            | /                              |                   |                   |                                 |                                |                                 |                                |                          |                          |                 |                  |                                |
| 5       | Basic Opt.        | Neutral | Gas Phase | 0                  | 2                 | C <sub>1</sub>          | -1293.63014846 | 0.265330 | 0.281777 | -1293.348372 | 0.7684                | 1.94  | 1                                            | 21.0, 27.4                     | 6.318             | 1.996             | -0.7649                         | -2.2514                        | -2.2590                         | 2.981                          | 0.1776                   | -0.1283                  | 4.832           | 3.490            | 1.342                          |
|         | SPE <sup>f</sup>  | Neutral | DCM       | 0                  | 2                 | C <sub>1</sub>          | -1293.65825686 | /        | /        | /            | /                     | /     | /                                            | /                              |                   |                   |                                 |                                |                                 |                                |                          |                          |                 |                  |                                |
|         | SPE <sup>f</sup>  | Cation  | Gas Phase | +1                 | 0                 | C <sub>1</sub>          | -1293.39191727 | /        | /        | /            | /                     | /     | /                                            | /                              |                   |                   |                                 |                                |                                 |                                |                          |                          |                 |                  |                                |
|         | SPE <sup>f</sup>  | Anion   | Gas Phase | -1                 | 0                 | C <sub>1</sub>          | -1293.69266061 | /        | /        | /            | /                     | /     | /                                            | /                              |                   |                   |                                 |                                |                                 |                                |                          |                          |                 |                  |                                |
|         | Basic Opt.        | Cation  | Gas Phase | +1                 | 0                 | C <sub>1</sub>          | -1293.39989618 | 0.267408 | 0.283724 | -1293.116172 | /                     | 3.28  | 1                                            | 8.65, 25.1                     |                   |                   |                                 |                                |                                 |                                |                          |                          |                 |                  |                                |
|         | SPE <sup>g</sup>  | Cation  | DCM       | +1                 | 0                 | C <sub>1</sub>          | -1293.48263569 | /        | /        | /            | /                     | /     | /                                            | /                              |                   |                   |                                 |                                |                                 |                                |                          |                          |                 |                  |                                |
|         | Basic Opt.        | Anion   | Gas Phase | -1                 | 0                 | C <sub>1</sub>          | -1293.7016207  | 0.263341 | 0.279898 | -1293.421722 | /                     | 1.80  | 6                                            | 38.6, 42.5                     |                   |                   |                                 |                                |                                 |                                |                          |                          |                 |                  |                                |
|         | SPE <sup>h</sup>  | Anion   | DCM       | -1                 | 0                 | C <sub>1</sub>          | -1293.78464041 | /        | /        | /            | /                     | /     | /                                            | /                              |                   |                   |                                 |                                |                                 |                                |                          |                          |                 |                  |                                |
| 6       | Basic Opt.        | Neutral | Gas Phase | 0                  | 2                 | C <sub>1</sub>          | -1233.72321033 | 0.291316 | 0.310985 | -1233.412226 | 0.7689                | 2.60  | 1                                            | 27.8, 28.6                     | 6.513             | 2.209             | -0.7692                         | -2.3457                        | -2.1006                         | 2.908                          | 0.1814                   | -0.1301                  | 4.936           | 3.540            | 1.396                          |
|         | SPE <sup>f</sup>  | Neutral | DCM       | 0                  | 2                 | C <sub>1</sub>          | -1233.75147919 | /        | /        | /            | /                     | /     | /                                            | /                              |                   |                   |                                 |                                |                                 |                                |                          |                          |                 |                  |                                |
|         | SPE <sup>f</sup>  | Cation  | Gas Phase | +1                 | 0                 | C <sub>1</sub>          | -1233.47677819 | /        | /        | /            | /                     | /     | /                                            | /                              |                   |                   |                                 |                                |                                 |                                |                          |                          |                 |                  |                                |
|         | SPE <sup>f</sup>  | Anion   | Gas Phase | -1                 | 0                 | C <sub>1</sub>          | -1233.78746881 | /        | /        | /            | /                     | /     | /                                            | /                              |                   |                   |                                 |                                |                                 |                                |                          |                          |                 |                  |                                |
|         | Basic Opt.        | Cation  | Gas Phase | +1                 | 0                 | C <sub>1</sub>          | -1233.48548343 | 0.293099 | 0.312599 | -1233.172884 | /                     | 3.33  | 5                                            | 31.0, 33.9                     |                   |                   |                                 |                                |                                 |                                |                          |                          |                 |                  |                                |
|         | SPE <sup>g</sup>  | Cation  | DCM       | +1                 | 0                 | C <sub>1</sub>          | -1233.57168778 | /        | /        | /            | /                     | /     | /                                            | /                              |                   |                   |                                 |                                |                                 |                                |                          |                          |                 |                  |                                |
|         | Basic Opt.        | Anion   | Gas Phase | -1                 | 0                 | C <sub>1</sub>          | -1233.80192659 | 0.288644 | 0.308519 | -1233.493408 | /                     | 0.79  | 3                                            | 18.8, 23.0                     |                   |                   |                                 |                                |                                 |                                |                          |                          |                 |                  |                                |
|         | SPE <sup>h</sup>  | Anion   | DCM       | -1                 | 0                 | C <sub>1</sub>          | -1233.87912244 | /        | /        | /            | /                     | /     | /                                            | /                              |                   |                   |                                 |                                |                                 |                                |                          |                          |                 |                  |                                |
| 7       | Basic Opt.        | Neutral | Gas Phase | 0                  | 2                 | C <sub>1</sub>          | -1277.93009541 | 0.362661 | 0.383867 | -1277.546228 | 0.7694                | 2.39  | 3                                            | 24.9, 31.1                     | 6.130             | 1.995             | -0.9842                         | -2.3698                        | -2.3970                         | 2.798                          | 0.1744                   | -0.1252                  | 4.744           | 3.408            | 1.336                          |
|         | SPE <sup>f</sup>  | Neutral | DCM       | 0                  | 2                 | C <sub>1</sub>          | -1277.96626316 | /        | /        | /            | /                     | /     | /                                            | /                              |                   |                   |                                 |                                |                                 |                                |                          |                          |                 |                  |                                |

Continued from previous page ...

| Species          | Task <sup>b</sup> | State   | Medium    | Chrg. <sup>c</sup> | Spin Multiplicity | Point grp. <sup>d</sup> | $E^{\circ}$    | ZPVE     | TC-E     | H (298 K)    | <S <sup>2</sup> > | $\mu$ | RMS Gradt. <sup>e</sup> ( $\times 10^{-6}$ ) | Lowest Vibrational Frequencies | $IP_{\text{gas}}$ | $EA_{\text{gas}}$ | $\Delta G_{\text{sol}}$ (Neut.) | $\Delta G_{\text{sol}}$ (Cat.) | $\Delta G_{\text{sol}}$ (Anion) | $\Delta \Delta G_{\text{sol}}$ | $\Delta G_{\text{ox}}^0$ | $\Delta G_{\text{red}}^0$ | $E_{\text{ox}}$ | $E_{\text{red}}$ | $E_{\text{gap}}^{\text{Calc}}$ |
|------------------|-------------------|---------|-----------|--------------------|-------------------|-------------------------|----------------|----------|----------|--------------|-------------------|-------|----------------------------------------------|--------------------------------|-------------------|-------------------|---------------------------------|--------------------------------|---------------------------------|--------------------------------|--------------------------|---------------------------|-----------------|------------------|--------------------------------|
|                  | SPE <sup>f</sup>  | Cation  | Gas Phase | +1                 | 0                 | C <sub>1</sub>          | -1277.69986415 | /        | /        | /            | /                 | /     | /                                            | /                              |                   |                   |                                 |                                |                                 |                                |                          |                           |                 |                  |                                |
|                  | SPE <sup>f</sup>  | Anion   | Gas Phase | -1                 | 0                 | C <sub>1</sub>          | -1277.99309849 | /        | /        | /            | /                 | /     | /                                            | /                              |                   |                   |                                 |                                |                                 |                                |                          |                           |                 |                  |                                |
|                  | Basic Opt.        | Cation  | Gas Phase | +1                 | 0                 | C <sub>1</sub>          | -1277.70664740 | 0.364708 | 0.385700 | -1277.320948 | /                 | 3.57  | 2                                            | 27.7, 28.4                     |                   |                   |                                 |                                |                                 |                                |                          |                           |                 |                  |                                |
|                  | SPE <sup>g</sup>  | Cation  | DCM       | +1                 | 0                 | C <sub>1</sub>          | -1277.79373731 | /        | /        | /            | /                 | /     | /                                            | /                              |                   |                   |                                 |                                |                                 |                                |                          |                           |                 |                  |                                |
|                  | Basic Opt.        | Anion   | Gas Phase | -1                 | 0                 | C <sub>1</sub>          | -1278.00085445 | 0.359713 | 0.381301 | -1277.619553 | /                 | 1.27  | 3                                            | 23.0, 30.0                     |                   |                   |                                 |                                |                                 |                                |                          |                           |                 |                  |                                |
|                  | SPE <sup>h</sup>  | Anion   | DCM       | -1                 | 0                 | C <sub>1</sub>          | -1278.08894217 | /        | /        | /            | /                 | /     | /                                            | /                              |                   |                   |                                 |                                |                                 |                                |                          |                           |                 |                  |                                |
| 8                | Basic Opt.        | Neutral | Gas Phase | 0                  | 2                 | C <sub>1</sub>          | -1667.15377623 | 0.563761 | 0.596057 | -1666.557719 | 0.7702            | 3.40  | 2                                            | 14.2, 18.9                     | 5.874             | 2.000             | -1.3324                         | -2.5378                        | -2.6842                         | 2.557                          | 0.1716                   | -0.1232                   | 4.669           | 3.352            | 1.316                          |
|                  | SPE <sup>f</sup>  | Neutral | DCM       | 0                  | 2                 | C <sub>1</sub>          | -1667.20274247 | /        | /        | /            | /                 | /     | /                                            | /                              |                   |                   |                                 |                                |                                 |                                |                          |                           |                 |                  |                                |
|                  | SPE <sup>f</sup>  | Cation  | Gas Phase | +1                 | 0                 | C <sub>1</sub>          | -1666.93111028 | /        | /        | /            | /                 | /     | /                                            | /                              |                   |                   |                                 |                                |                                 |                                |                          |                           |                 |                  |                                |
|                  | SPE <sup>f</sup>  | Anion   | Gas Phase | -1                 | 0                 | C <sub>1</sub>          | -1667.21333028 | /        | /        | /            | /                 | /     | /                                            | /                              |                   |                   |                                 |                                |                                 |                                |                          |                           |                 |                  |                                |
|                  | Basic Opt.        | Cation  | Gas Phase | +1                 | 0                 | C <sub>1</sub>          | -1666.93932665 | 0.565374 | 0.597476 | -1666.341851 | /                 | 4.04  | 2                                            | 14.3, 21.2                     |                   |                   |                                 |                                |                                 |                                |                          |                           |                 |                  |                                |
|                  | SPE <sup>g</sup>  | Cation  | DCM       | +1                 | 0                 | C <sub>1</sub>          | -1667.03259044 | /        | /        | /            | /                 | /     | /                                            | /                              |                   |                   |                                 |                                |                                 |                                |                          |                           |                 |                  |                                |
|                  | Basic Opt.        | Anion   | Gas Phase | -1                 | 0                 | C <sub>1</sub>          | -1667.2247309  | 0.561064 | 0.593497 | -1666.631234 | /                 | 9.32  | 1                                            | 12.4, 16.7                     |                   |                   |                                 |                                |                                 |                                |                          |                           |                 |                  |                                |
| SPE <sup>h</sup> | Anion             | DCM     | -1        | 0                  | C <sub>1</sub>    | -1667.32337328          | /              | /        | /        | /            | /                 | /     | /                                            |                                |                   |                   |                                 |                                |                                 |                                |                          |                           |                 |                  |                                |

<sup>a</sup> For different energy units, 1 Hartree = 627.5095 kcal mol<sup>-1</sup> = 27.2114 eV. <sup>b</sup> The computational tasks, including basic geometry optimizations/frequency analysis (Basic Opt.) and single-point energy calculations (SPE) herein. <sup>c</sup> Charge. <sup>d</sup> Symmetry point group of the geometry. <sup>e</sup> In Cartesian coordinates. <sup>f</sup> Based on the optimized geometry of the neutral species in gas phase. <sup>g</sup> Based on the optimized geometry of the cations in gas phase. <sup>h</sup> Based on the optimized geometry of the anions in gas phase.

**Table S21.** Summary of the DFT-computed solvation free energies for radicals **Blatter** and **1 – 8**: solvation energies at the neutral ( $\Delta G_{sol}(\text{Neut.})$ , eV), cationic ( $\Delta G_{sol}(\text{Cat.})$ , eV), and anionic ( $\Delta G_{sol}(\text{Anion})$ , eV) states, differential solvation stabilization energies ( $\Delta\Delta G_{sol}$ , eV)<sup>a</sup>, and the corresponding (or twice) differential energies in three different states of charge ( $2\Delta\Delta G_{sol}(\text{Neut.})$ ,  $\Delta\Delta G_{sol}(\text{Cat.})$  and  $\Delta\Delta\Delta G_{sol}(\text{Anion})$ , eV) relative to that of **Blatter**. Data are derived from Table S20.

| Species        | $\Delta G_{sol}(\text{Neut.})$ | $2\Delta\Delta G_{sol}(\text{Neut.})^b$ | $\Delta G_{sol}(\text{Cat.})$ | $\Delta\Delta G_{sol}(\text{Cat.})^c$ | $\Delta G_{sol}(\text{Anion})$ | $\Delta\Delta G_{sol}(\text{Anion})^d$ | $\Delta\Delta G_{sol}$ | $\Delta\Delta\Delta G_{sol}$ |
|----------------|--------------------------------|-----------------------------------------|-------------------------------|---------------------------------------|--------------------------------|----------------------------------------|------------------------|------------------------------|
| <b>Blatter</b> | -0.7917                        | <b>0.0000</b>                           | -2.2877                       | <b>0.0000</b>                         | -2.2998                        | <b>0.0000</b>                          | 3.004                  | <b>0.000</b>                 |
| <b>1</b>       | -0.9878                        | -0.3922                                 | -2.3283                       | -0.0406                               | -2.4070                        | -0.1072                                | 2.760                  | -0.244                       |
| <b>2</b>       | -1.0691                        | -0.5548                                 | -2.3573                       | -0.0696                               | -2.3646                        | -0.0648                                | 2.584                  | -0.420                       |
| <b>3</b>       | -1.0495                        | -0.5156                                 | -2.3401                       | -0.0524                               | -2.4147                        | -0.1149                                | 2.656                  | -0.348                       |
| <b>4</b>       | -0.7382                        | 0.1070                                  | -2.2495                       | 0.0382                                | -2.2406                        | 0.0592                                 | 3.014                  | 0.010                        |
| <b>5</b>       | -0.7649                        | 0.0536                                  | -2.2514                       | 0.0363                                | -2.2590                        | 0.0408                                 | 2.981                  | -0.023                       |
| <b>6</b>       | -0.7692                        | 0.0450                                  | -2.3457                       | -0.0580                               | -2.1006                        | 0.1992                                 | 2.908                  | -0.096                       |
| <b>7</b>       | -0.9842                        | -0.3850                                 | -2.3698                       | -0.0821                               | -2.3970                        | -0.0972                                | 2.798                  | -0.206                       |
| <b>8</b>       | -1.3324                        | -1.0814                                 | -2.5378                       | -0.2501                               | -2.6842                        | -0.3844                                | 2.557                  | -0.447                       |

<sup>a</sup> Differential solvation stabilization energies,  $\Delta\Delta G_{sol} = 2\Delta G_{sol}(\text{Neut.}) - \Delta G_{sol}(\text{Cat.}) - \Delta G_{sol}(\text{Anion})$ . <sup>b</sup> Twice the differential solvation energies of the neutrals relative to **Blatter**,  $2\Delta\Delta G_{sol}(\text{Neut.}) = 2 \times (\Delta G_{sol}(\text{Neut.}) - \Delta G_{sol}(\text{Neut.}, \text{Blatter}))$ . <sup>c</sup> Differential cationic-state solvation energies relative to **Blatter**,  $\Delta\Delta G_{sol}(\text{Cat.}) = \Delta G_{sol}(\text{Cat.}) - \Delta G_{sol}(\text{Cat.}, \text{Blatter})$ . <sup>d</sup> Differential anionic-state solvation energies relative to **Blatter**,  $\Delta\Delta G_{sol}(\text{Anion}) = \Delta G_{sol}(\text{Anion}) - \Delta G_{sol}(\text{Anion}, \text{Blatter})$ .

**Table S22.** DFT-computed static polarizabilities ( $\alpha$ , a.u.) and neutral-state solvation free energies ( $\Delta G_{\text{sol}}(\text{neut})$ , eV) for radicals **Blatter** and **1 – 8**.<sup>a</sup> Data of  $\Delta G_{\text{sol}}(\text{Neut})$  are derived from Table S17. The corresponding plot of  $\alpha_{\text{iso}}$  vs  $\Delta G_{\text{sol}}(\text{Neut})$  is shown in Fig. S29.

| Species        | $\alpha_{xx}$ | $\alpha_{xy}$ | $\alpha_{yy}$ | $\alpha_{xz}$ | $\alpha_{yz}$ | $\alpha_{zz}$ | $\alpha_{\text{avg}}^b$ | $\Delta G_{\text{sol}}(\text{Neut})$ |
|----------------|---------------|---------------|---------------|---------------|---------------|---------------|-------------------------|--------------------------------------|
| <b>Blatter</b> | 327.095       | 7.486         | 298.963       | 4.993         | 7.323         | 132.594       | 252.88                  | -0.7917                              |
| <b>1</b>       | 447.53        | 3.695         | 434.605       | -2.082        | -23.057       | 188.976       | 357.04                  | -0.9878                              |
| <b>2</b>       | 629.354       | 21.216        | 437.114       | -9.489        | -4.117        | 178.844       | 415.10                  | -1.0691                              |
| <b>3</b>       | 625.665       | 1.238         | 396.451       | -11.357       | -5.145        | 181.469       | 401.20                  | -1.0495                              |
| <b>4</b>       | 354.897       | 3.275         | 311.593       | 0.001         | 0.003         | 112.875       | 259.79                  | -0.7382                              |
| <b>5</b>       | 368.492       | 1.936         | 329.564       | -7.774        | -4.987        | 127.857       | 275.30                  | -0.7649                              |
| <b>6</b>       | 354.931       | 3.89          | 303.552       | -13.801       | 6.971         | 143.706       | 267.40                  | -0.7692                              |
| <b>7</b>       | 512.942       | 33.404        | 438.046       | -20.822       | 9.005         | 161.473       | 370.82                  | -0.9842                              |
| <b>8</b>       | 671.654       | 8.305         | 524.78        | -13.506       | 10.261        | 326.831       | 507.76                  | -1.3324                              |

<sup>a</sup> Polarizabilities were computed at the M06-2X/def2-TZVP level of theory in the gas phase. Solvation free energies were obtained using the SMD solvation model (dichloromethane) at the same level. <sup>b</sup> Average polarizability,  $\alpha_{\text{avg}} = (\alpha_{xx} + \alpha_{yy} + \alpha_{zz})/3$ .

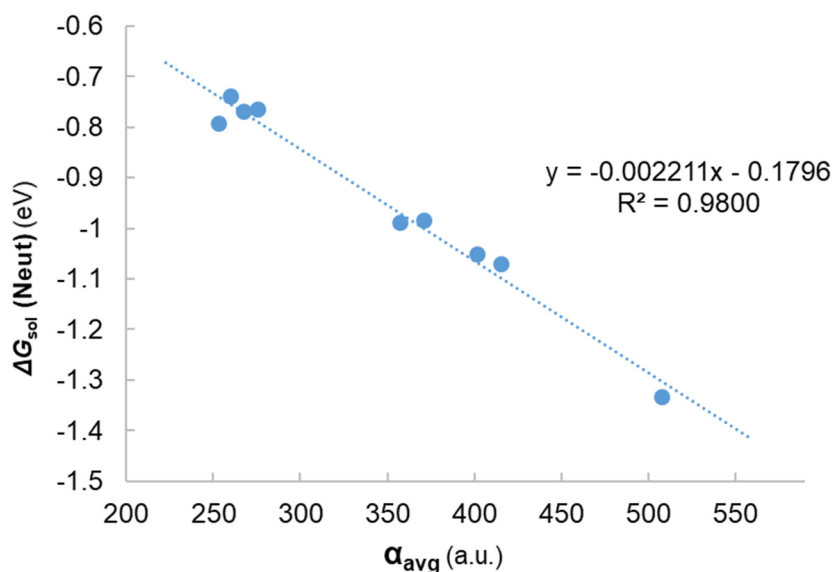

**Fig. S29.** Plot of DFT(M06-2X-GD3/def2-TZVP)-calculated solvation free energy for the neutral species ( $\Delta G_{\text{sol}}(\text{neut})$ , eV) in DCM *versus* their average static polarizabilities ( $\alpha_{\text{avg}}$ , a.u.). The linear fit ( $R^2 = 0.98$ ) demonstrates a strong correlation between increased polarizability and enhanced neutral-state solvation.

## 10.5 NICS Calculations

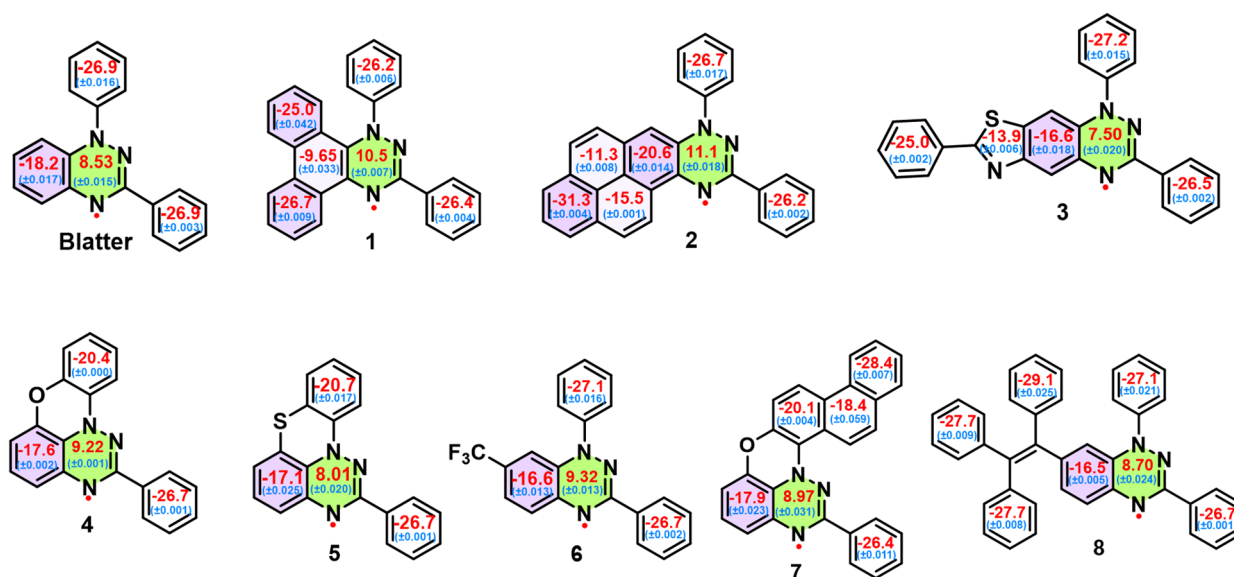

**Fig. S30.** DFT(SMD M06-2X-GD3/def2-TZVP) calculated NICS(1)zz values for the radicals in DCM. The values are indicated in red numbers. Hydrogen atoms are omitted for clarity in the structures.

## 10.6 Statistical Analyses of Correlation between $\rho_{\text{FR}}$ and $E_{\text{gap}}$

As noted in the main text, the cyclic voltammetry of radical **8** reported in the literature<sup>S7</sup> shows a reduction wave suggestive of a multi-electron process, likely resulting in an underestimated reduction potential and hence an overestimated electrochemical gap. Linear regression analyses were carried out on the correlation between the experimentally determined electrochemical gap ( $E_{\text{gap}}^{\text{Expt}}$ ) and DFT-calculated total spin density on the triazinyl-fused six-membered ring ( $\rho_{\text{FR}}$ ) as well as that between the DFT-calculated electrochemical gaps ( $E_{\text{gap}}^{\text{Calc}}$ ) and  $\rho_{\text{FR}}$  for the set of radicals including all the studied ones (**Blatter**, **1**, **1-tBu**, and **2 – 8**), which confirms the overestimation of the actual electrochemical gap, as demonstrated by the abnormally larger standard residual for radical **8** in the correlation between  $E_{\text{gap}}^{\text{Expt}}$  and  $\rho_{\text{FR}}$  (Fig. S31), compared to that in  $E_{\text{gap}}^{\text{Calc}}$  vs  $\rho_{\text{FR}}$  (Fig. S32). Radical **8** is thus omitted from the correlation analysis.

In addition to Fig. 7 in the main text, Figs. S33 and S34 show the correlations between  $\rho_{\text{FR}}$  and the experimentally determined electrochemical gap ( $E_{\text{gap}}^{\text{Expt}}$ ) for other two sets of radicals: (1) **Blatter**, **1**, **1-tBu**, and **2 – 7** (Fig. S33) and (2) **1**, **1-tBu**, **2 – 5** and **7** (i.e., includes only the  $\pi$ -extended (**1**, **1-tBu**, **2**, **3**) and the  $\pi$ -planarized (**4**, **5** and **7**) Blatter derivatives) (Fig. S34).

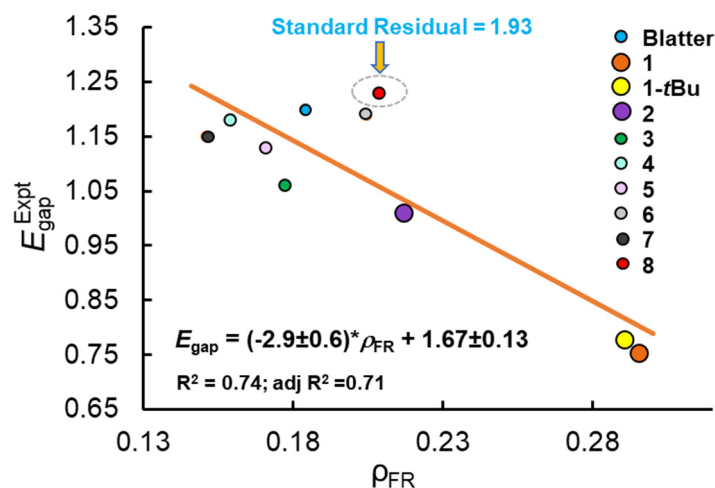

**Fig. S31.** Plot of experimentally determined electrochemical gap ( $E_{gap}^{Expt}$ ) vs DFT-calculated total spin density on the triazinyl-fused six-membered ring ( $\rho_{FR}$ ) for the set of radicals including **Blatter**, **1**, **1-tBu**, and **2 – 8**. The solid line represents the linear regression fit through the predicted values, with the regression equation and adjusted  $R^2 = 0.71$  shown in the figure. Error bars for slope and intercept correspond to 95 % confidence interval; P-value is  $1.369 \times 10^{-3}$  and  $1.238 \times 10^{-6}$  for the slope and the intercept, respectively; standard residual for **8** = 1.93.

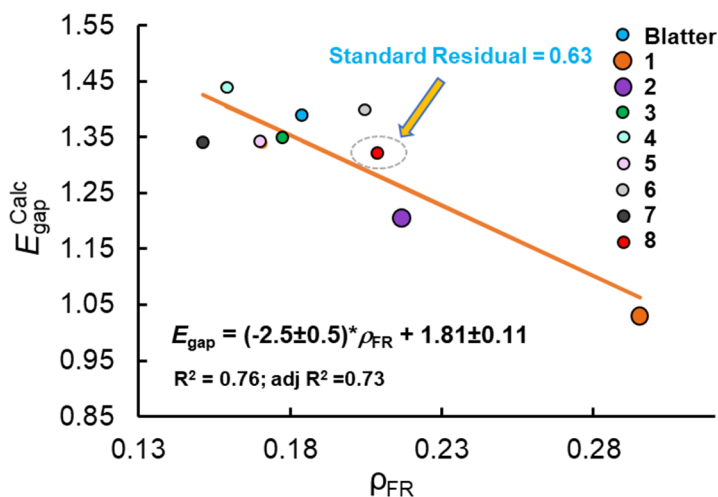

**Fig. S32.** Plot of DFT-calculated electrochemical gap ( $E_{gap}^{Calc}$ ) vs total spin density on the triazinyl-fused six-membered ring ( $\rho_{FR}$ ) for a set of radicals including **Blatter** and **1 – 8**. The solid line represents the linear regression fit through the predicted values, with the regression equation and adjusted  $R^2 = 0.73$  shown in the figure. Error bars for slope and intercept correspond to 95 % confidence interval; P-value is 0.00218 and  $6.316 \times 10^{-7}$  for the slope and the intercept, respectively; standard residual for **8** = 0.63.

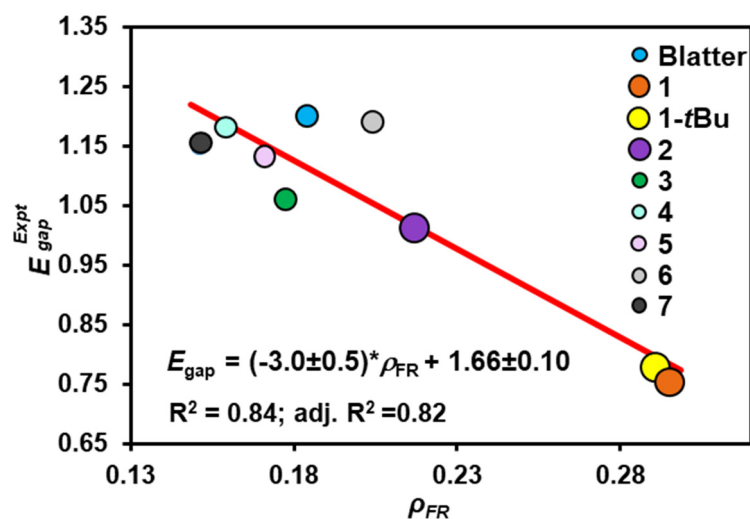

**Fig. S33.** Plot of experimentally determined electrochemical gap ( $E_{\text{gap}}^{\text{Expt}}$ ) vs total spin density on the triazinyl-fused six-membered ring ( $\rho_{\text{FR}}$ ) for the set of radicals including **Blatter**, **1**, **1-tBu**, and **2 – 7**. The solid line represents the linear regression fit through the predicted values, with the regression equation and adjusted  $R^2 = 0.822$  shown in the figure. Error bars for slope and intercept correspond to 95 % confidence interval; P-value is 0.000460 and  $8.042 \times 10^{-7}$  for the slope and the intercept, respectively; standard residual for **6** = 2.00.

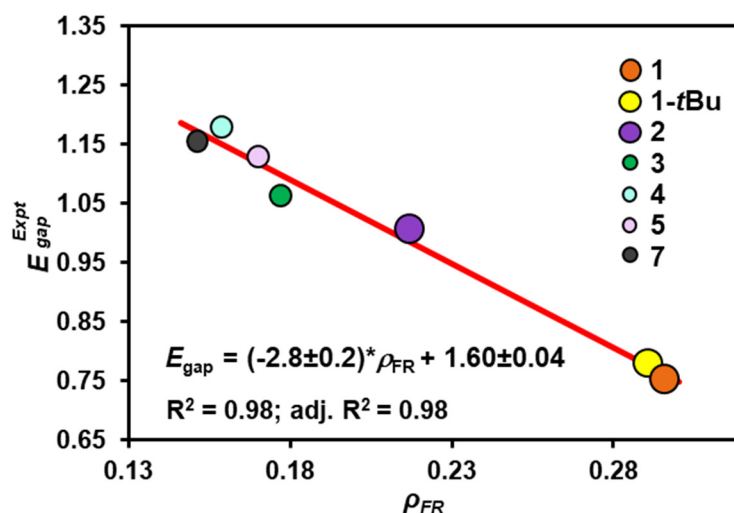

**Fig. S34.** Plot of DFT-calculated electrochemical gap ( $E_{\text{gap}}^{\text{Expt}}$ ) vs total spin density on the triazinyl-fused six-membered ring ( $\rho_{\text{FR}}$ ) for the set of radicals including only the  $\pi$ -extended (**1**, **1-tBu**, **2**, **3**) and the  $\pi$ -planarized (**4**, **5** and **7**) Blatter derivatives. The solid line represents the linear regression fit through the predicted values, with the regression equation and adjusted  $R^2 = 0.976$  shown in the figure. Error bars for slope and intercept correspond to 95 % confidence interval; P-value is  $2.024 \times 10^{-4}$  and  $1.756 \times 10^{-7}$  for the slope and the intercept, respectively.

## 10.7 DFT Calculations on a Molecular Pair Extracted from the Crystal Structure

To assess whether intermolecular interactions exist in the deposited monolayer, a pair of molecules of radical **1** extracted from its crystal structure was employed as a dimer model. The two molecules are arranged parallelly with an intermolecular distance of 14.6 Å, which is 7.2 Å smaller than the average intermolecular distance observed in the vapor-deposited monolayer (21.8 Å).

Single-point calculations were performed on these two molecules using several functionals and basis sets. Initial attempts with UM062X-D3/def2TZVP yielded unphysical results, in which the wavefunction of the broken-symmetry singlet state did not converge properly, and the inclusion of the D3 dispersion correction introduced excessively long-range interactions that are unlikely to be relevant at this separation. In contrast, calculations using UM062X/def2TZVP and UB3LYP/def2TZVP (both without D3 correction) produced reasonable and mutually consistent results. As a reference, single-molecule calculations on a monomer were also performed at the UM062X/def2TZVP level.

The computational results are summarized in Table S23. For the molecular pair, the open-shell singlet and triplet states are essentially degenerate, with a small coupling constant  $J = 0.25$  K, which indicates negligible spin–spin coupling between the two radicals at this distance. The binding energy, evaluated as  $\Delta E = 2E_{\text{monomer}} - E_{\text{dimer(OS)}}$ , was found to be  $-0.02098$  kcal mol<sup>-1</sup>, effectively zero within computational accuracy. These results suggest that the intermolecular interactions are negligible at the 14.6 Å separation, and are expected to be even weaker at the larger distance observed in the monolayer.

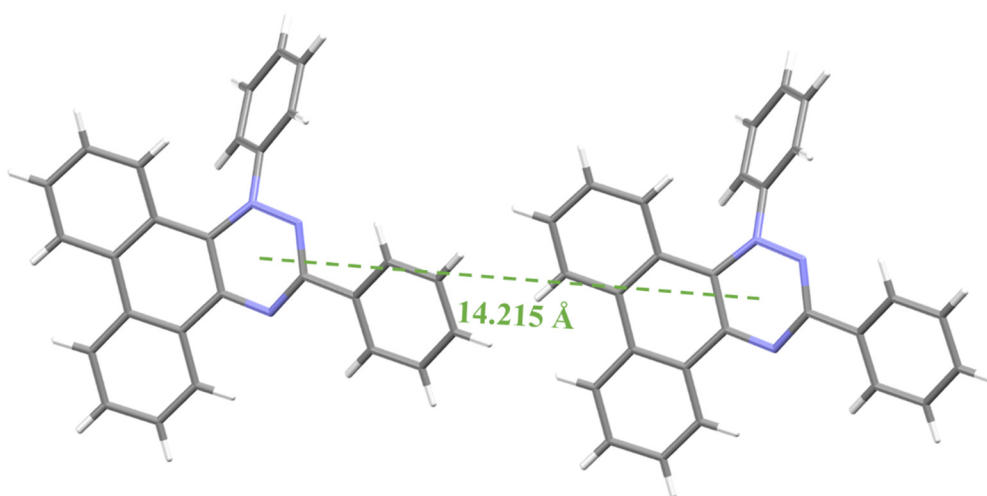

**Fig. S35.** Intermolecular distance (ca. 14.215 Å) in the structure of **Dimer\_parallel**.

**Table S23.** The DFT single-point calculations on a molecular pair of **1** (**1<sub>2</sub>**) extracted from its crystal structure and a monomer (**1**) in the gas phase: charge (*e*), spin multiplicity, energies ( $E^\circ$ , hartree), expectation value of total spin squared ( $\langle S^2 \rangle$ ), singlet-triplet energy gaps ( $\Delta E_{U(S-T)}$ , kcal·mol<sup>-1</sup>), projected singlet-triplet energy gaps ( $\Delta E_{S-T}$ , kcal·mol<sup>-1</sup>) and intermolecular coupling constant (*J*, K).

| Species              | Basis Set       | State      | Chrg. <sup>b</sup> | Spin Multiplicity | Point grp. <sup>c</sup> | $E^\circ$      | Converg. <sup>d</sup> ( $\times 10^{-8}$ ) | $\langle S^2 \rangle$ | $\Delta E_{U(S-T)}$ | $\Delta E_{S-T}$ | <i>J</i> |
|----------------------|-----------------|------------|--------------------|-------------------|-------------------------|----------------|--------------------------------------------|-----------------------|---------------------|------------------|----------|
| <b>1<sub>2</sub></b> | UM062X/def2TZVP | Triplet    | 0                  | 3                 | C <sub>1</sub>          | -2407.25944803 | 0.22                                       | 2.0387                | 0.000489458         | 0.0009979        | 0.251    |
|                      |                 | BS-singlet | 0                  | 1                 | C <sub>1</sub>          | -2407.25944725 | 0.22                                       | 1.0387                |                     |                  |          |
|                      | UB3LYP/Def2TZVP | Triplet    | 0                  | 3                 | C <sub>1</sub>          | -2408.23995907 | 0.51                                       | 2.0332                | 0.000489458         | 0.0009952        | 0.251    |
|                      |                 | BS-singlet | 0                  | 1                 | C <sub>1</sub>          | -2408.23995829 | 0.27                                       | 1.0332                |                     |                  |          |
| <b>1</b>             | UM062X/def2TZVP | Doublet    | 0                  | 2                 | C <sub>1</sub>          | -1203.89843429 | 0.68                                       | 0.768                 | /                   | /                | /        |

<sup>a</sup> For different energy units, 1 Hartree = 627.5095 kcal mol<sup>-1</sup> = 27.2114 eV = 315774.65 K. <sup>b</sup> Charge. <sup>c</sup> Symmetry point group of the geometry. <sup>d</sup> The density matrix RMS convergence.

## 11. Thin Films

The experiments were performed with an ultra-high-vacuum BOSON-STM system operated at a low temperature of 6 K. The Au(111) single crystal was cleaned by repeated cycles of Ar<sup>+</sup> sputtering at 1.0 keV followed by annealing at 620 K for 7 min. Radical **1** was thermally sublimed (sublimation temperature: 108 °C – 127 °C) from a K-cell evaporator onto the clean Au(111) surface kept at RT. All STM images were obtained in the constant-current modes. dI/dV spectra were acquired using lock-in detection of the tunneling current by adding a 3 mV<sub>peak</sub> modulation at 613 Hz to the sample bias at the set point of 100 mV, 20 pA.

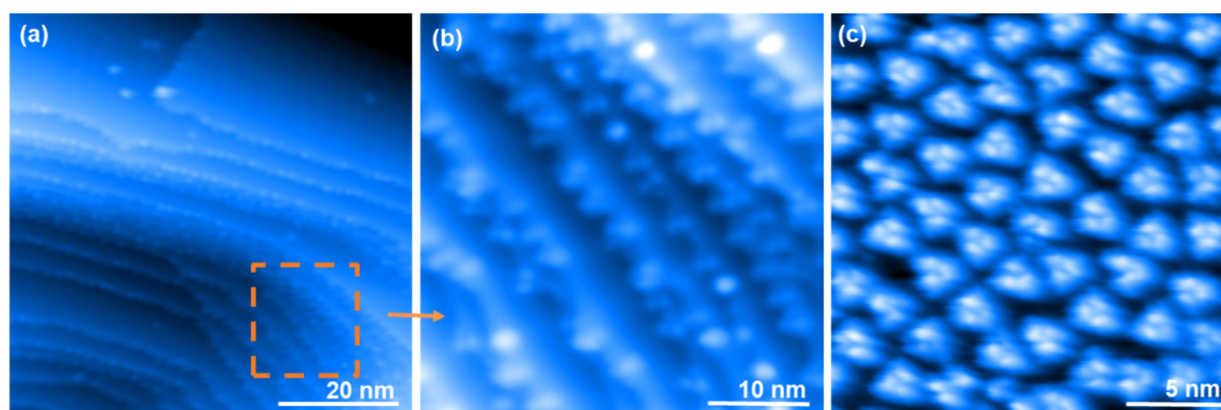

**Fig. S36.** Adsorption of radical **1** onto the Au(111) surface. (a–b) Deposition at 108–115 °C for 2 min: The (a) overview and (b) magnified STM images of the film (set point: (a) 200 mV, 20 pA; (b) 200 mV, 20 pA) (The orange dashed rectangle in (a) indicates the same regions in (b)); (c) Deposition at 123–127 °C for 50 s: STM image of the film (set point: 700 mV, 20 pA).

## 12. Routine $^1\text{H}$ NMR, $^{13}\text{C}$ NMR and HRMS Spectra of Compounds

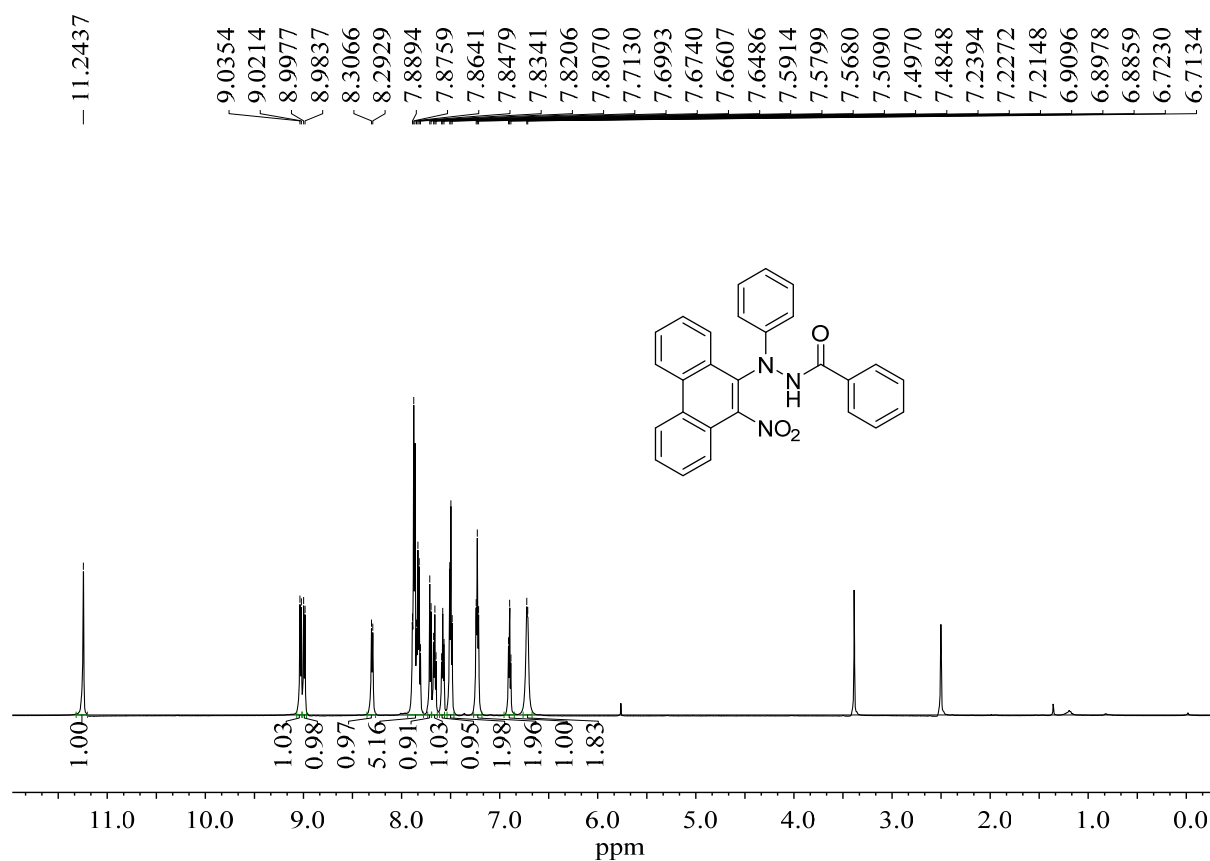

**Fig. S37.**  $^1\text{H}$  NMR spectrum (600 MHz, 298 K,  $(\text{CD}_3)_2\text{SO}$ ) of **12** (sample label: 5-P45-U-5).

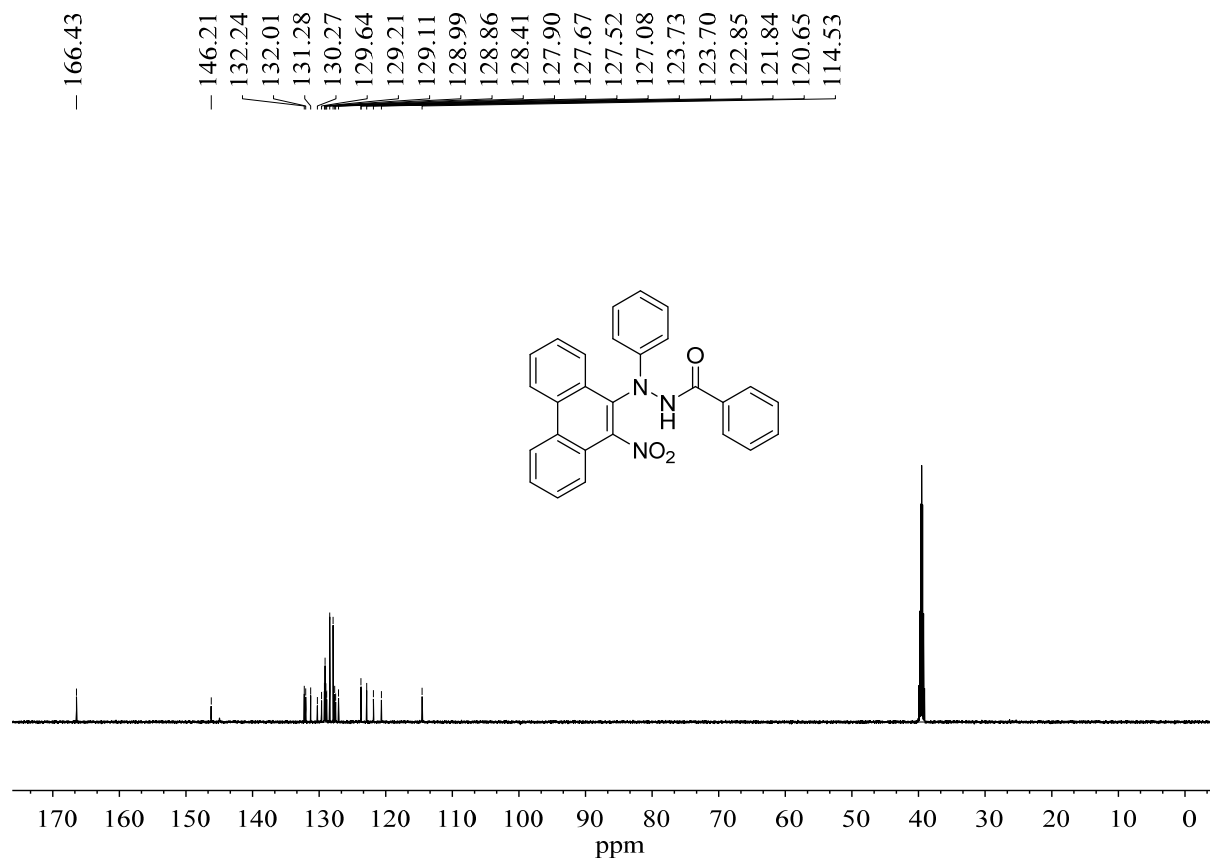

**Fig. S38.**  $^{13}\text{C}$  NMR spectra (150 MHz, 298K,  $(\text{CD}_3)_2\text{SO}$ ) of **12** (sample label: 5-P45-U-5).

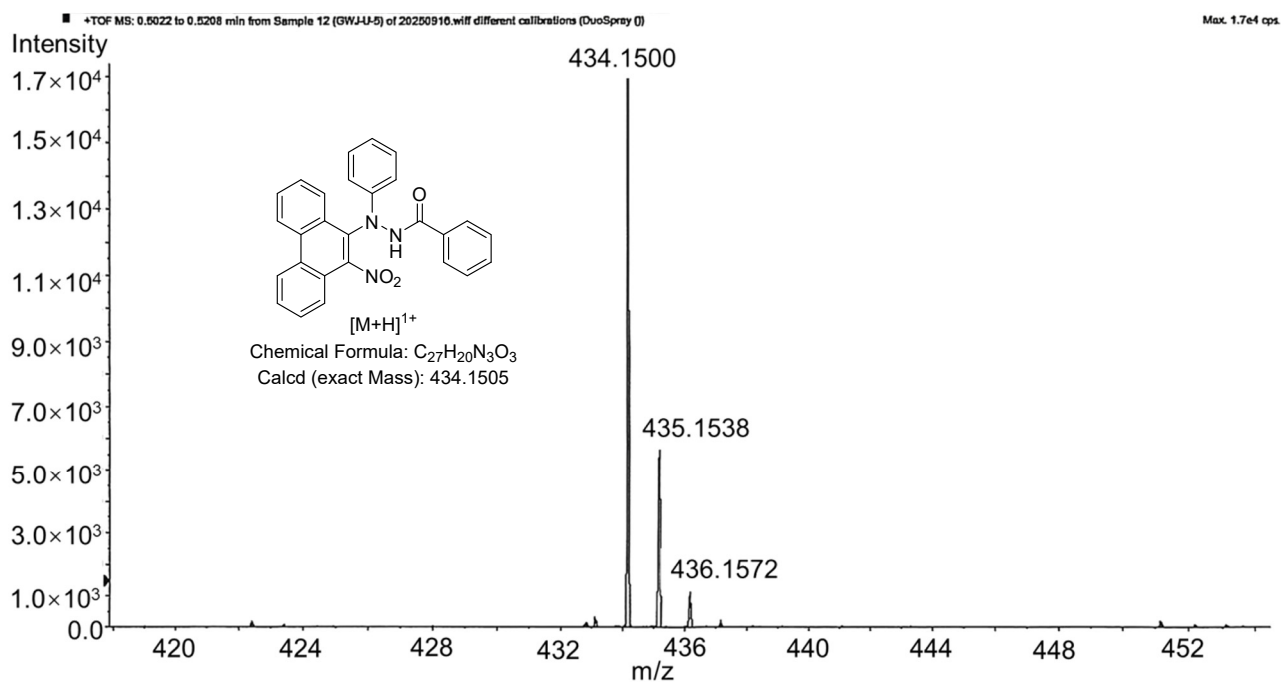

**Fig. S39.** HRMS (ESI-TOF) spectrum of molecular **12** (sample label: 5-P45-U-5), obtained in the positive ion mode using acetone as the mobile flow phase. [M +H]<sup>+</sup>: Calcd C<sub>27</sub>H<sub>20</sub>N<sub>3</sub>O<sub>3</sub> 434.1505, found 434.1500 (-1.15 ppm).

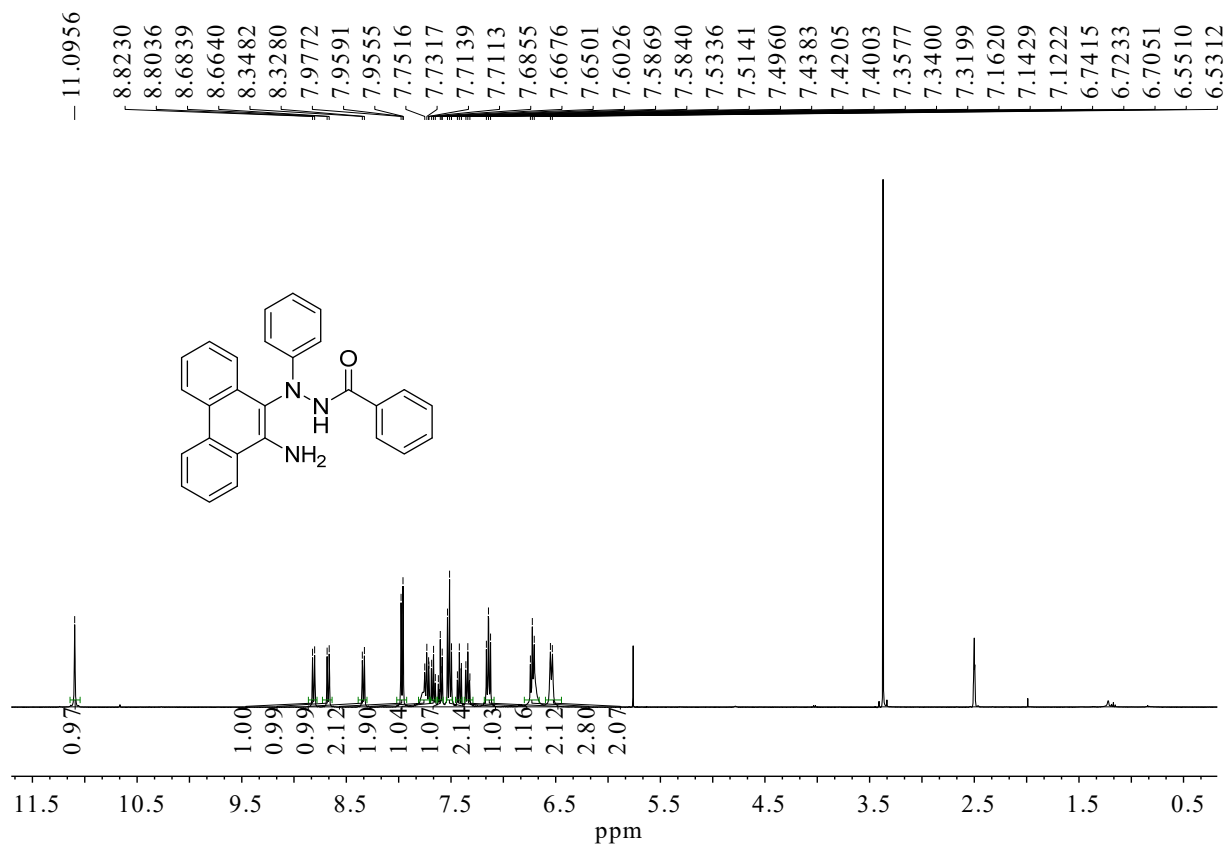

**Fig. S40.** <sup>1</sup>H NMR spectrum (400 MHz, 298 K, (CD<sub>3</sub>)<sub>2</sub>SO) of **13** (sample label: 4-P147-U-6).

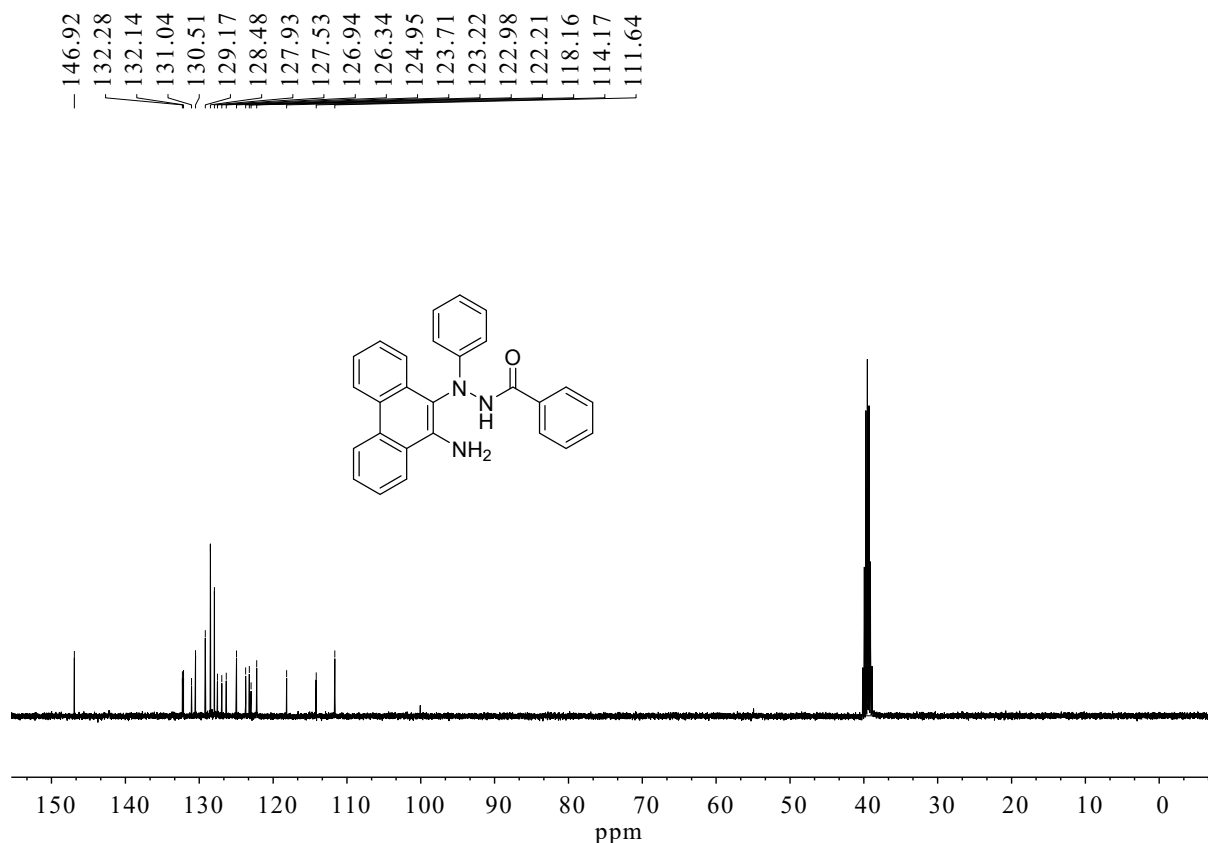

**Fig. S41.** <sup>13</sup>C NMR spectra (100 MHz, 298 K, (CD<sub>3</sub>)<sub>2</sub>SO) of **13** (sample label: 4-P147-U-6).

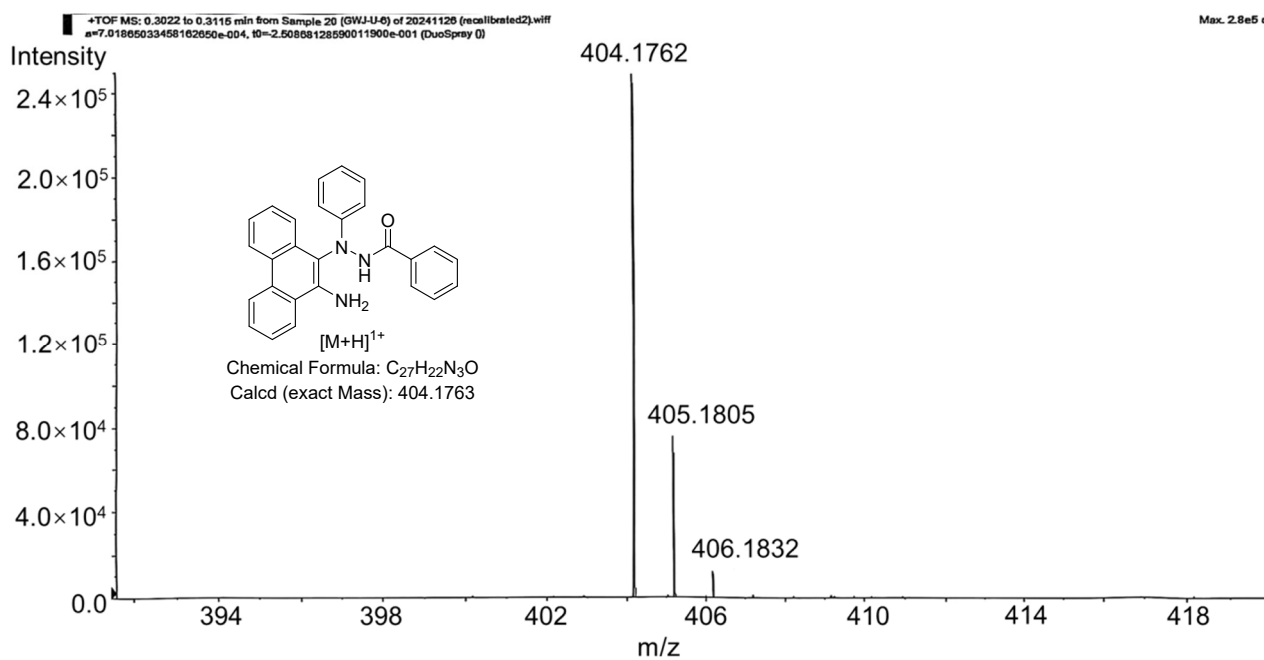

**Fig. S42.** HRMS (ESI-TOF) spectrum of molecular **13** (sample label: 4-P147-U-6), obtained in the positive ion mode using methanol as the mobile flow phase. [M + H]<sup>1+</sup>: Calcd C<sub>27</sub>H<sub>22</sub>N<sub>3</sub>O 404.1763, found 404.1762 (-0.25 ppm).

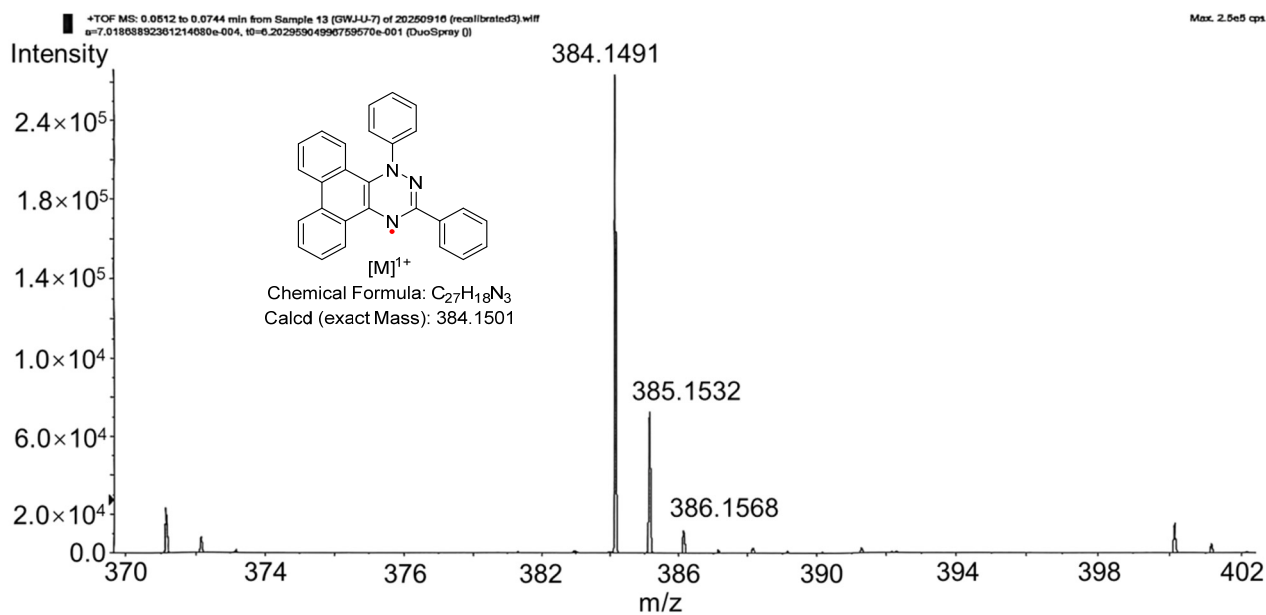

**Fig. S43.** HRMS (ESI-TOF) spectrum of molecular **1** (sample label: 5-P61-U-7), obtained in the positive ion mode using methanol as the mobile flow phase.  $[M]^+$ : Calcd:  $C_{27}H_{18}N_3$  384.1501, found 384.1491 (-2.60 ppm).

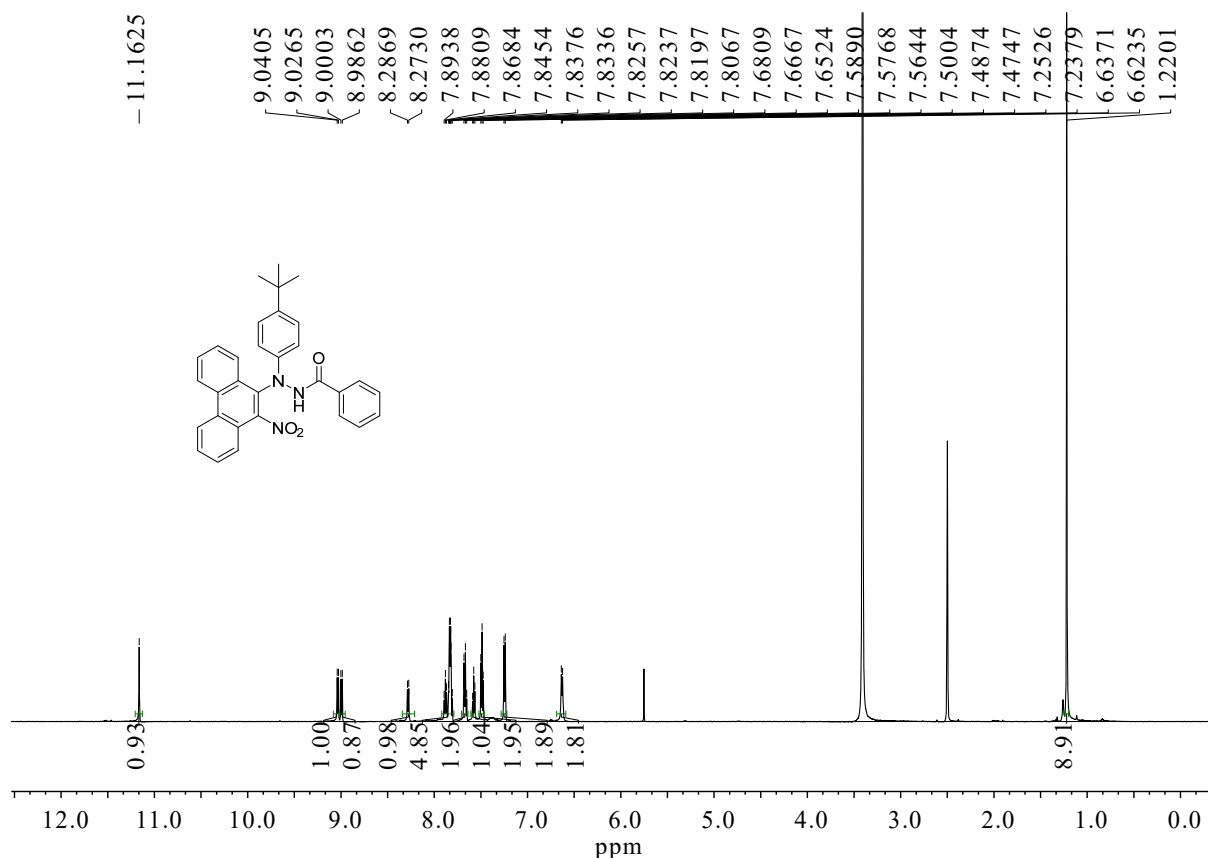

**Fig. S44.**  $^1H$  NMR spectrum (600 MHz, 298 K,  $(CD_3)_2SO$ ) of **15** (sample label: 5-P116-O-5).

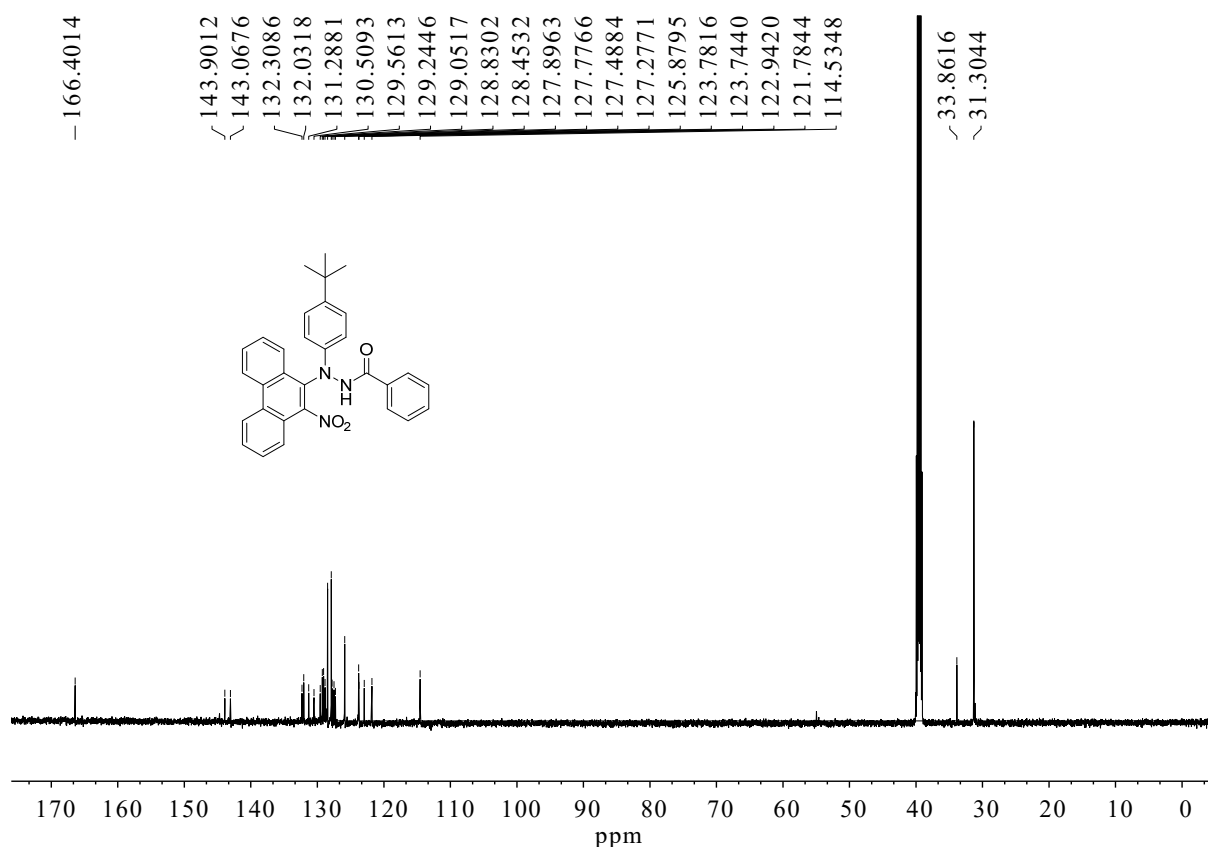

**Fig. S45.** <sup>13</sup>C NMR spectra (150 MHz, 298 K, (CD<sub>3</sub>)<sub>2</sub>SO) of **15** (sample label: 5-P116-O-5).

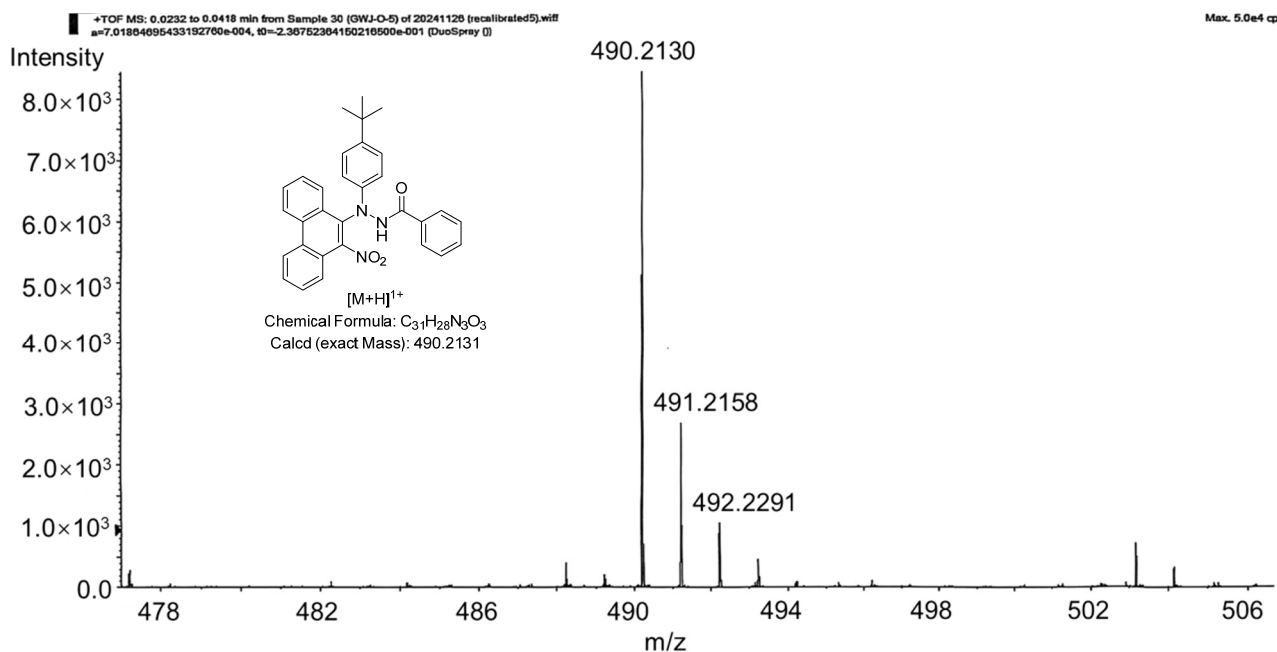

**Fig. S46.** HRMS (ESI-TOF) spectrum of molecular **15** (sample label: 5-P116-O-5), obtained in the positive ion mode using acetone as the mobile flow phase. [M + H]<sup>1+</sup>: Calcd C<sub>31</sub>H<sub>28</sub>N<sub>3</sub>O<sub>3</sub> 490.2131, found 490.2130 (-0.20 ppm).

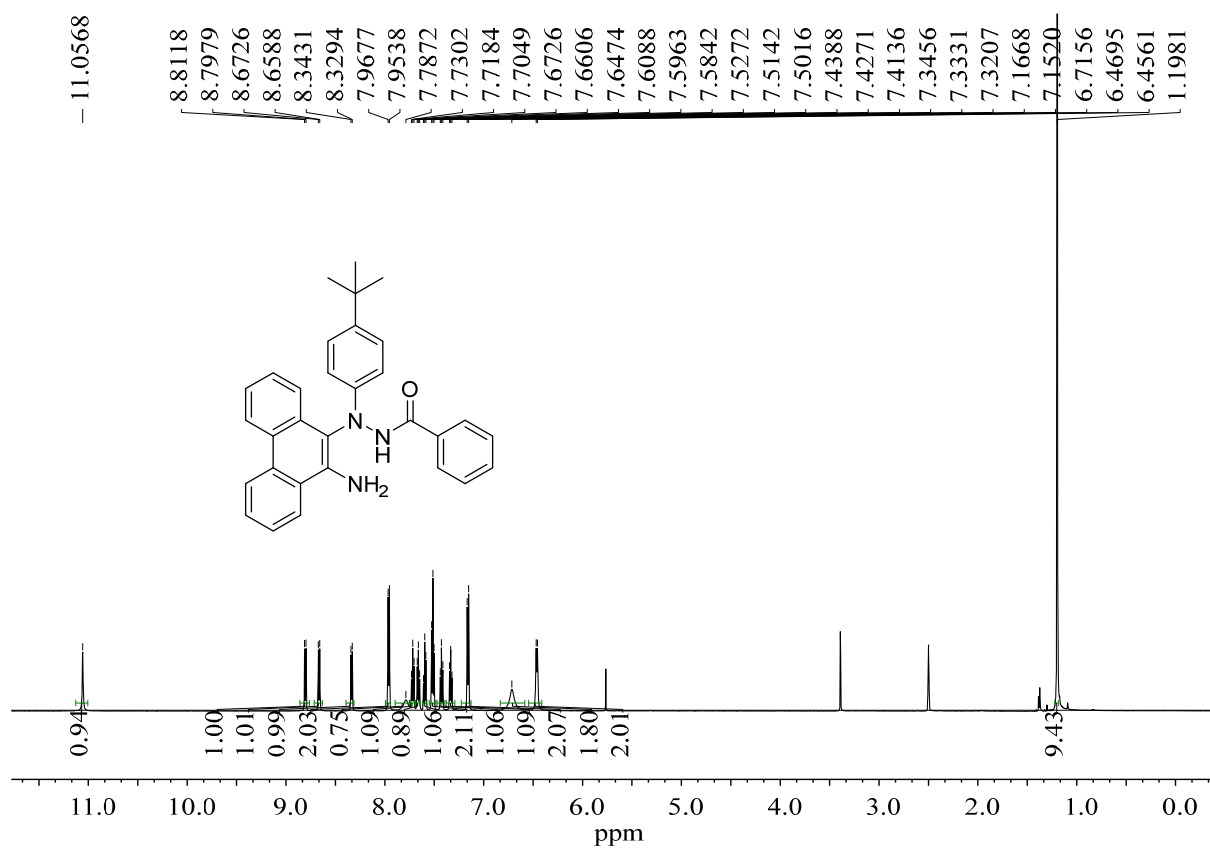

**Fig. S47.**  $^1\text{H}$  NMR spectrum (600 MHz, 298 K,  $(\text{CD}_3)_2\text{SO}$ ) of **16** (sample label: 6-P93-O-6).

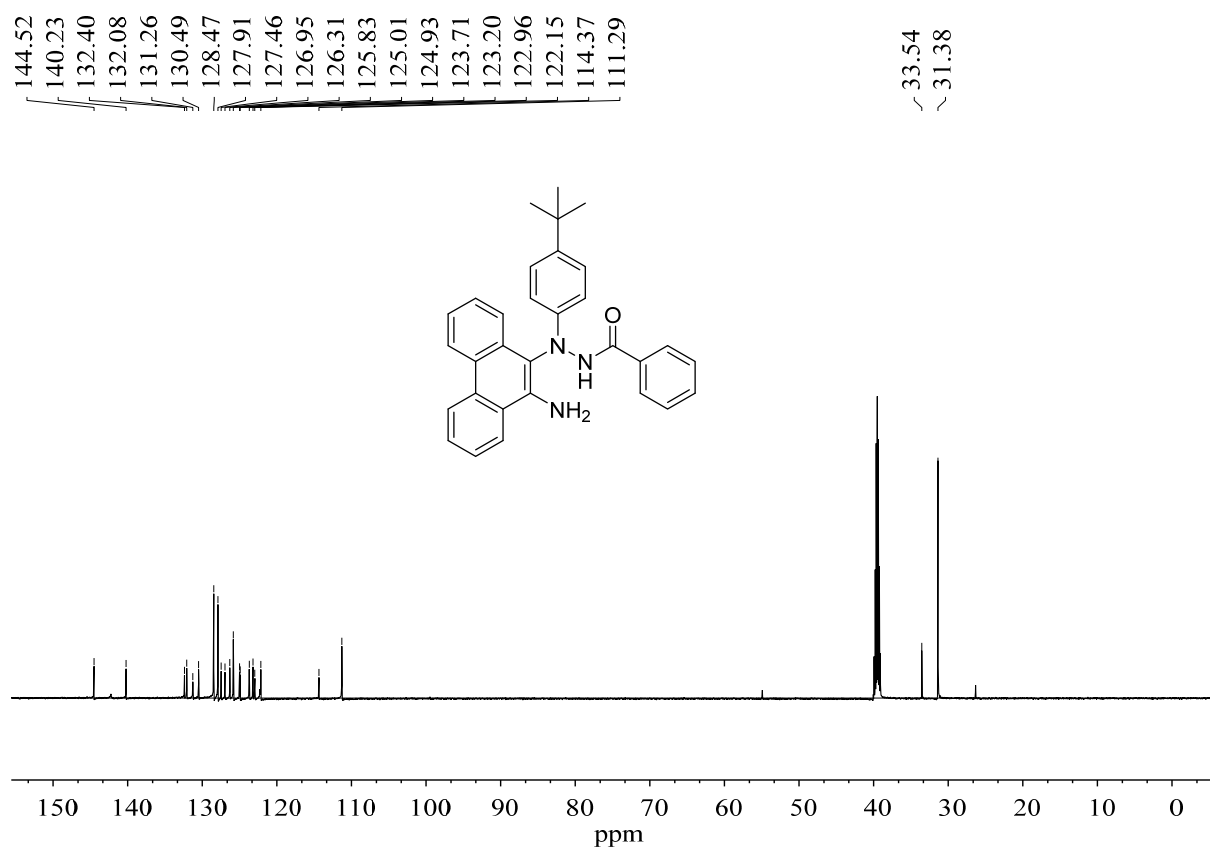

**Fig. S48.**  $^{13}\text{C}$  NMR spectra (150 MHz, 298 K,  $(\text{CD}_3)_2\text{SO}$ ) of **16** (sample label: 6-P93-O-6).

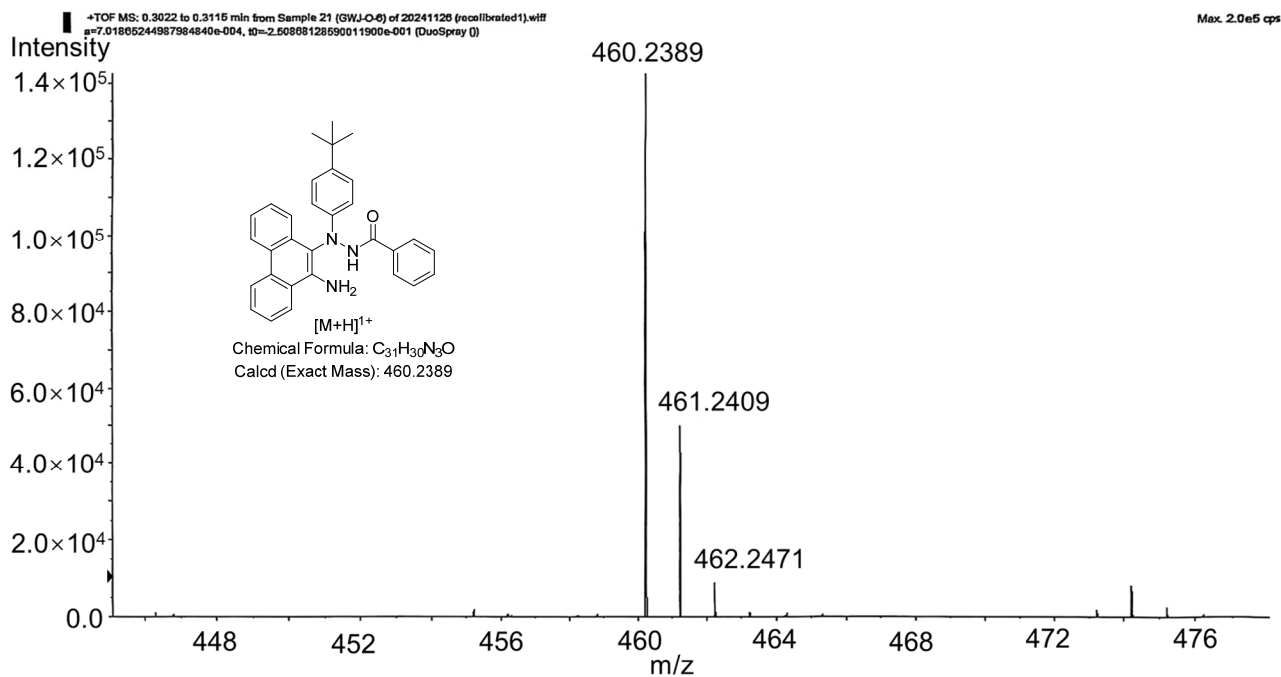

**Fig. S49.** HRMS (ESI-TOF) spectrum of molecular **16** (sample label: 6-P93-O-6), obtained in the positive ion mode using methanol as the mobile flow phase. [M + H]<sup>1+</sup>: Calcd C<sub>31</sub>H<sub>30</sub>N<sub>3</sub>O 460.2389, found 460.2389 (0.00 ppm).

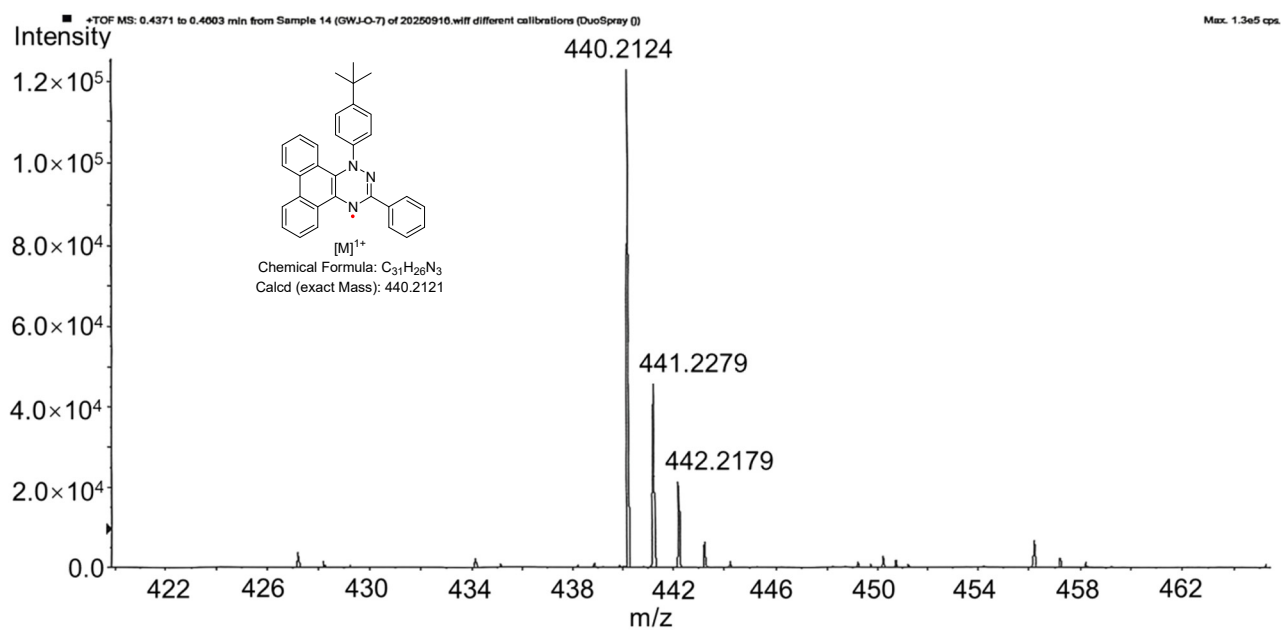

**Fig. S50.** HRMS (ESI-TOF) spectrum of molecular **1-tBu** (sample label: 6-P101-O-7), obtained in the positive ion mode using methanol as the mobile flow phase. [M]<sup>1+</sup>: Calcd: C<sub>31</sub>H<sub>26</sub>N<sub>3</sub> 440.2127, found 440.2124 (-0.681 ppm).

### 13. Optimized Geometries/Coordinate Outputs of DFT Calculations

| Blatter (Neutral, in DCM): |               |             |                         |           |           |               | Blatter (Neutral, Gas Phase): |             |                         |           |           |  |  |
|----------------------------|---------------|-------------|-------------------------|-----------|-----------|---------------|-------------------------------|-------------|-------------------------|-----------|-----------|--|--|
| Center Number              | Atomic Number | Atomic Type | Coordinates (Angstroms) |           |           | Center Number | Atomic Number                 | Atomic Type | Coordinates (Angstroms) |           |           |  |  |
|                            |               |             | X                       | Y         | Z         |               |                               |             | X                       | Y         | Z         |  |  |
| 1                          | 7             | 0           | 0.928448                | -0.068939 | 0.032471  | 1             | 7                             | 0           | 0.925218                | -0.077964 | -0.023202 |  |  |
| 2                          | 7             | 0           | -0.332155               | -0.541022 | 0.022892  | 2             | 7                             | 0           | -0.333771               | -0.555746 | -0.039626 |  |  |
| 3                          | 7             | 0           | -1.185446               | 1.668153  | 0.104798  | 3             | 7                             | 0           | -1.186136               | 1.650363  | 0.145759  |  |  |
| 4                          | 6             | 0           | -1.314351               | 0.350649  | 0.062185  | 4             | 6                             | 0           | -1.315700               | 0.335706  | 0.050049  |  |  |
| 5                          | 6             | 0           | -2.689308               | -0.222969 | 0.064228  | 5             | 6                             | 0           | -2.690470               | -0.232901 | 0.054312  |  |  |
| 6                          | 6             | 0           | -3.790980               | 0.616185  | -0.091632 | 6             | 6                             | 0           | -3.789242               | 0.622715  | 0.062136  |  |  |
| 7                          | 6             | 0           | -2.894107               | -1.594267 | 0.218429  | 7             | 6                             | 0           | -2.896352               | -1.611317 | 0.050449  |  |  |
| 8                          | 6             | 0           | -4.179329               | -2.114748 | 0.215054  | 8             | 6                             | 0           | -4.183598               | -2.124214 | 0.051640  |  |  |
| 9                          | 6             | 0           | -5.075763               | 0.092238  | -0.097318 | 9             | 6                             | 0           | -5.075665               | 0.105830  | 0.063356  |  |  |
| 10                         | 6             | 0           | -5.274071               | -1.273803 | 0.056354  | 10            | 6                             | 0           | -5.276761               | -1.267654 | 0.057492  |  |  |
| 11                         | 6             | 0           | 1.932140                | -1.084329 | 0.012861  | 11            | 6                             | 0           | 1.935023                | -1.081463 | 0.002465  |  |  |
| 12                         | 6             | 0           | 1.812292                | -2.115205 | -0.911051 | 12            | 6                             | 0           | 1.817370                | -2.178866 | -0.840996 |  |  |
| 13                         | 6             | 0           | 2.755510                | -3.130443 | -0.924513 | 13            | 6                             | 0           | 2.777342                | -3.176957 | -0.797514 |  |  |
| 14                         | 6             | 0           | 3.811474                | -3.115974 | -0.021567 | 14            | 6                             | 0           | 3.846157                | -3.085628 | 0.084166  |  |  |
| 15                         | 6             | 0           | 3.917207                | -2.085078 | 0.903468  | 15            | 6                             | 0           | 3.947439                | -1.992617 | 0.933932  |  |  |
| 16                         | 6             | 0           | 2.975928                | -1.065661 | 0.929309  | 16            | 6                             | 0           | 2.991092                | -0.989940 | 0.901117  |  |  |
| 17                         | 1             | 0           | -3.631982               | 1.679234  | -0.211545 | 17            | 1                             | 0           | -3.617516               | 1.690005  | 0.067760  |  |  |
| 18                         | 1             | 0           | -5.923815               | 0.753636  | -0.223367 | 18            | 1                             | 0           | -5.924398               | 0.777588  | 0.068598  |  |  |
| 19                         | 1             | 0           | -6.277160               | -1.681738 | 0.052487  | 19            | 1                             | 0           | -6.281965               | -1.669479 | 0.058903  |  |  |
| 20                         | 1             | 0           | -4.326905               | -3.180420 | 0.338524  | 20            | 1                             | 0           | -4.334831               | -3.195980 | 0.050391  |  |  |
| 21                         | 1             | 0           | -2.043656               | -2.250265 | 0.345197  | 21            | 1                             | 0           | -2.040653               | -2.272016 | 0.051315  |  |  |
| 22                         | 1             | 0           | 3.039673                | -0.272226 | 1.663112  | 22            | 1                             | 0           | 3.048076                | -0.148664 | 1.579231  |  |  |
| 23                         | 1             | 0           | 4.729497                | -2.077562 | 1.619161  | 23            | 1                             | 0           | 4.766134                | -1.924854 | 1.638261  |  |  |
| 24                         | 1             | 0           | 4.547479                | -3.909883 | -0.034752 | 24            | 1                             | 0           | 4.592807                | -3.868092 | 0.115816  |  |  |
| 25                         | 1             | 0           | 2.665847                | -3.932030 | -1.646569 | 25            | 1                             | 0           | 2.689931                | -4.029864 | -1.457797 |  |  |
| 26                         | 1             | 0           | 0.983337                | -2.112575 | -1.606409 | 26            | 1                             | 0           | 0.971230                | -2.237582 | -1.511499 |  |  |
| 27                         | 6             | 0           | 0.311293                | 3.537252  | -0.001380 | 27            | 6                             | 0           | 0.298979                | 3.524795  | 0.031685  |  |  |
| 28                         | 6             | 0           | 1.587132                | 4.043505  | -0.123780 | 28            | 6                             | 0           | 1.565679                | 4.038504  | -0.133725 |  |  |
| 29                         | 6             | 0           | 2.677446                | 3.175031  | -0.227655 | 29            | 6                             | 0           | 2.652518                | 3.177988  | -0.307257 |  |  |
| 30                         | 6             | 0           | 0.091458                | 2.153216  | 0.035248  | 30            | 6                             | 0           | 0.083178                | 2.139162  | 0.044752  |  |  |
| 31                         | 6             | 0           | 1.207644                | 1.287856  | -0.028721 | 31            | 6                             | 0           | 1.199140                | 1.281275  | -0.078771 |  |  |
| 32                         | 6             | 0           | 2.496554                | 1.806365  | -0.184856 | 32            | 6                             | 0           | 2.477262                | 1.808484  | -0.284492 |  |  |
| 33                         | 1             | 0           | 3.344478                | 1.144158  | -0.280940 | 33            | 1                             | 0           | 3.318952                | 1.149573  | -0.438767 |  |  |
| 34                         | 1             | 0           | 3.676503                | 3.573498  | -0.347129 | 34            | 1                             | 0           | 3.643172                | 3.582732  | -0.466220 |  |  |
| 35                         | 1             | 0           | 1.745363                | 5.113719  | -0.153080 | 35            | 1                             | 0           | 1.719141                | 5.109346  | -0.145542 |  |  |
| 36                         | 1             | 0           | -0.553609               | 4.186190  | 0.056194  | 36            | 1                             | 0           | -0.567592               | 4.163296  | 0.140264  |  |  |

  

| Blatter (Cation, Gas Phase): |               |             |                         |           |           |               | Blatter (Anion, Gas Phase): |             |                         |           |           |  |  |
|------------------------------|---------------|-------------|-------------------------|-----------|-----------|---------------|-----------------------------|-------------|-------------------------|-----------|-----------|--|--|
| Center Number                | Atomic Number | Atomic Type | Coordinates (Angstroms) |           |           | Center Number | Atomic Number               | Atomic Type | Coordinates (Angstroms) |           |           |  |  |
|                              |               |             | X                       | Y         | Z         |               |                             |             | X                       | Y         | Z         |  |  |
| 1                            | 7             | 0           | 0.890663                | -0.066883 | -0.029106 | 1             | 7                           | 0           | -0.970046               | -0.108384 | 0.150035  |  |  |
| 2                            | 7             | 0           | -0.309444               | -0.534462 | 0.005030  | 2             | 7                           | 0           | 0.351264                | -0.547724 | 0.377806  |  |  |
| 3                            | 7             | 0           | -1.173402               | 1.652740  | 0.069341  | 3             | 7                           | 0           | 1.088705                | 1.519192  | -0.573704 |  |  |
| 4                            | 6             | 0           | -1.341947               | 0.339196  | 0.030898  | 4             | 6                           | 0           | 1.247815                | 0.279857  | -0.092477 |  |  |
| 5                            | 6             | 0           | -2.691310               | -0.236377 | 0.045416  | 5             | 6                           | 0           | 2.655341                | -0.231406 | -0.034414 |  |  |
| 6                            | 6             | 0           | -3.797391               | 0.615562  | 0.052943  | 6             | 6                           | 0           | 3.709441                | 0.587471  | -0.430304 |  |  |
| 7                            | 6             | 0           | -2.875017               | -1.620921 | 0.052610  | 7             | 6                           | 0           | 2.936767                | -1.525691 | 0.400748  |  |  |
| 8                            | 6             | 0           | -4.155769               | -2.143996 | 0.066438  | 8             | 6                           | 0           | 4.243759                | -1.986096 | 0.448312  |  |  |
| 9                            | 6             | 0           | -5.074200               | 0.083475  | 0.066630  | 9             | 6                           | 0           | 5.017880                | 0.123486  | -0.390969 |  |  |
| 10                           | 6             | 0           | -5.254744               | -1.294217 | 0.073365  | 10            | 6                           | 0           | 5.291939                | -1.163184 | 0.051561  |  |  |
| 11                           | 6             | 0           | 1.932744                | -1.078681 | -0.003787 | 11            | 6                           | 0           | -1.924958               | -1.077076 | 0.005435  |  |  |
| 12                           | 6             | 0           | 1.909697                | -2.069819 | -0.969385 | 12            | 6                           | 0           | -1.624389               | -2.423058 | 0.304888  |  |  |
| 13                           | 6             | 0           | 2.888918                | -3.049710 | -0.924122 | 13            | 6                           | 0           | -2.576811               | -3.413129 | 0.141469  |  |  |
| 14                           | 6             | 0           | 3.846510                | -3.033559 | 0.081721  | 14            | 6                           | 0           | -3.852797               | -3.127839 | -0.329950 |  |  |
| 15                           | 6             | 0           | 3.835688                | -2.038432 | 1.050857  | 15            | 6                           | 0           | -4.146871               | -1.806703 | -0.653449 |  |  |
| 16                           | 6             | 0           | 2.872897                | -1.042872 | 1.013424  | 16            | 6                           | 0           | -3.215941               | -0.797875 | -0.492857 |  |  |
| 17                           | 1             | 0           | -3.647990               | 1.686104  | 0.048905  | 17            | 1                           | 0           | 3.470198                | 1.587655  | -0.765320 |  |  |
| 18                           | 1             | 0           | -5.931470               | 0.742875  | 0.072555  | 18            | 1                           | 0           | 5.828084                | 0.771447  | -0.704489 |  |  |
| 19                           | 1             | 0           | -6.255267               | -1.706423 | 0.085283  | 19            | 1                           | 0           | 6.312888                | -1.524634 | 0.085536  |  |  |
| 20                           | 1             | 0           | -4.298710               | -3.215974 | 0.074069  | 20            | 1                           | 0           | 4.446995                | -2.993465 | 0.792304  |  |  |
| 21                           | 1             | 0           | -2.019202               | -2.281148 | 0.053007  | 21            | 1                           | 0           | 2.109844                | -2.156550 | 0.697649  |  |  |
| 22                           | 1             | 0           | 2.836953                | -0.269781 | 1.770608  | 22            | 1                           | 0           | -3.468924               | 0.209872  | -0.786936 |  |  |
| 23                           | 1             | 0           | 4.570837                | -2.041044 | 1.844052  | 23            | 1                           | 0           | -5.123304               | -1.552471 | -1.050727 |  |  |
| 24                           | 1             | 0           | 4.602730                | -3.806532 | 0.115604  | 24            | 1                           | 0           | -4.591011               | -3.909127 | -0.454415 |  |  |
| 25                           | 1             | 0           | 2.899831                | -3.828719 | -1.674289 | 25            | 1                           | 0           | -2.311156               | -4.434850 | 0.390369  |  |  |
| 26                           | 1             | 0           | 1.145281                | -2.067396 | -1.735249 | 26            | 1                           | 0           | -0.634321               | -2.658066 | 0.662119  |  |  |
| 27                           | 6             | 0           | 0.288138                | 3.536449  | 0.008480  | 27            | 6                           | 0           | -0.331398               | 3.458554  | -0.338817 |  |  |
| 28                           | 6             | 0           | 1.556014                | 4.008784  | -0.113270 | 28            | 6                           | 0           | -1.517382               | 4.037706  | 0.096570  |  |  |
| 29                           | 6             | 0           | 2.660166                | 3.120400  | -0.253737 | 29            | 6                           | 0           | -2.517721               | 3.253279  | 0.649378  |  |  |
| 30                           | 6             | 0           | 0.063235                | 2.133736  | 0.006665  | 30            | 6                           | 0           | -0.124784               | 2.076547  | -0.264271 |  |  |
| 31                           | 6             | 0           | 1.187209                | 1.258288  | -0.080485 | 31            | 6                           | 0           | -1.196453               | 1.282187  | 0.209530  |  |  |
| 32                           | 6             | 0           | 2.497315                | 1.768589  | -0.237519 | 32            | 6                           | 0           | -2.341251               | 1.869929  | 0.720485  |  |  |
| 33                           | 1             | 0           | 3.336240                | 1.100325  | -0.359336 | 33            | 1                           | 0           | -3.114646               | 1.245115  | 1.147882  |  |  |
| 34                           | 1             | 0           | 3.651788                | 3.533084  | -0.383835 | 34            | 1                           | 0           | -3.433236               | 3.699061  | 1.017109  |  |  |
| 35                           | 1             | 0           | 1.738873                | 5.075093  | -0.122131 | 35            | 1                           | 0           | -1.651275               | 5.110607  | 0.017368  |  |  |
| 36                           | 1             | 0           | -0.573530               | 4.184405  | 0.091051  | 36            | 1                           | 0           | 0.477286                | 4.062079  | -0.732613 |  |  |

  

| 1 (Neutral, in DCM): |               |             |                         |   |   |               | 1 (Neutral, Gas Phase): |             |                         |   |   |  |  |
|----------------------|---------------|-------------|-------------------------|---|---|---------------|-------------------------|-------------|-------------------------|---|---|--|--|
| Center Number        | Atomic Number | Atomic Type | Coordinates (Angstroms) |   |   | Center Number | Atomic Number           | Atomic Type | Coordinates (Angstroms) |   |   |  |  |
|                      |               |             | X                       | Y | Z |               |                         |             | X                       | Y | Z |  |  |

| Number | Number | Type | X         | Y         | Z         |
|--------|--------|------|-----------|-----------|-----------|
| 1      | 6      | 0    | 2.634277  | -4.473441 | 0.783938  |
| 2      | 6      | 0    | 3.173759  | -3.268500 | 0.392642  |
| 3      | 6      | 0    | 1.249146  | -4.619541 | 0.911093  |
| 4      | 6      | 0    | 0.425596  | -3.547508 | 0.658516  |
| 5      | 6      | 0    | 0.963616  | -2.308978 | 0.273874  |
| 6      | 6      | 0    | 2.354507  | -2.159662 | 0.117622  |
| 7      | 6      | 0    | 2.890328  | -0.890024 | -0.365983 |
| 8      | 6      | 0    | 2.030234  | 0.219489  | -0.536434 |
| 9      | 6      | 0    | 0.641313  | 0.079723  | -0.161838 |
| 10     | 6      | 0    | 0.085293  | -1.167050 | 0.090276  |
| 11     | 6      | 0    | 4.239387  | -0.753260 | -0.732603 |
| 12     | 6      | 0    | 2.535161  | 1.391025  | -1.135724 |
| 13     | 7      | 0    | -0.236115 | 1.151686  | -0.097992 |
| 14     | 7      | 0    | -1.576421 | 0.960493  | -0.202336 |
| 15     | 7      | 0    | -1.250512 | -1.346029 | 0.191466  |
| 16     | 6      | 0    | -2.006135 | -0.274348 | -0.068400 |
| 17     | 6      | 0    | -3.477356 | -0.469426 | -0.185094 |
| 18     | 6      | 0    | -4.007224 | -1.757805 | -0.211319 |
| 19     | 6      | 0    | -4.338870 | 0.624807  | -0.268358 |
| 20     | 6      | 0    | -5.706838 | 0.430244  | -0.376561 |
| 21     | 6      | 0    | -5.377211 | -1.949597 | -0.321584 |
| 22     | 6      | 0    | -6.230543 | -0.857258 | -0.403703 |
| 23     | 6      | 0    | 0.128152  | 2.464905  | 0.315672  |
| 24     | 6      | 0    | 1.079050  | 2.634572  | 1.315597  |
| 25     | 6      | 0    | 1.421153  | 3.917019  | 1.716734  |
| 26     | 6      | 0    | 0.814179  | 5.021604  | 1.132242  |
| 27     | 6      | 0    | -0.147577 | 4.838432  | 0.145393  |
| 28     | 6      | 0    | -0.496384 | 3.561495  | -0.267318 |
| 29     | 1      | 0    | -3.338403 | -2.605559 | -0.149153 |
| 30     | 1      | 0    | -5.778265 | -2.955065 | -0.343670 |
| 31     | 1      | 0    | -7.299713 | -1.007711 | -0.487442 |
| 32     | 1      | 0    | -6.367568 | 1.286054  | -0.435760 |
| 33     | 1      | 0    | -3.932021 | 1.626690  | -0.241790 |
| 34     | 1      | 0    | -1.239734 | 3.406297  | -1.037646 |
| 35     | 1      | 0    | -0.626838 | 5.694610  | -0.312091 |
| 36     | 1      | 0    | 1.084959  | 6.020796  | 1.448206  |
| 37     | 1      | 0    | 2.160336  | 4.050145  | 2.496346  |
| 38     | 1      | 0    | 1.541075  | 1.771095  | 1.776952  |
| 39     | 6      | 0    | 3.856723  | 1.487914  | -1.500225 |
| 40     | 6      | 0    | 4.723108  | 0.414466  | -1.276810 |
| 41     | 1      | 0    | 4.247709  | -3.187399 | 0.304013  |
| 42     | 1      | 0    | 3.288504  | -5.310434 | 0.993420  |
| 43     | 1      | 0    | 0.828460  | -5.569471 | 1.215638  |
| 44     | 1      | 0    | -0.646733 | -3.635962 | 0.765178  |
| 45     | 1      | 0    | 5.766451  | 0.488484  | -1.555716 |
| 46     | 1      | 0    | 4.917122  | -1.585882 | -0.612159 |
| 47     | 1      | 0    | 4.219546  | 2.393890  | -1.968676 |
| 48     | 1      | 0    | 1.875379  | 2.220588  | -1.343473 |

| Number | Number | Type | X         | Y         | Z         |
|--------|--------|------|-----------|-----------|-----------|
| 1      | 6      | 0    | 2.633269  | -4.462899 | 0.808824  |
| 2      | 6      | 0    | 3.171043  | -3.264384 | 0.399139  |
| 3      | 6      | 0    | 1.250028  | -4.604195 | 0.952678  |
| 4      | 6      | 0    | 0.426723  | -3.533383 | 0.698807  |
| 5      | 6      | 0    | 0.964931  | -2.302492 | 0.295374  |
| 6      | 6      | 0    | 2.352385  | -2.157223 | 0.120375  |
| 7      | 6      | 0    | 2.883224  | -0.893749 | -0.382424 |
| 8      | 6      | 0    | 2.024100  | 0.218221  | -0.541065 |
| 9      | 6      | 0    | 0.642015  | 0.084652  | -0.143467 |
| 10     | 6      | 0    | 0.084831  | -1.161238 | 0.113310  |
| 11     | 6      | 0    | 4.222461  | -0.764170 | -0.781221 |
| 12     | 6      | 0    | 2.521095  | 1.383225  | -1.158085 |
| 13     | 7      | 0    | -0.236659 | 1.157421  | -0.072916 |
| 14     | 7      | 0    | -1.576019 | 0.965513  | -0.183895 |
| 15     | 7      | 0    | -1.246744 | -1.341452 | 0.217487  |
| 16     | 6      | 0    | -2.002923 | -0.271076 | -0.052088 |
| 17     | 6      | 0    | -3.469326 | -0.472538 | -0.184115 |
| 18     | 6      | 0    | -3.989226 | -1.763705 | -0.210758 |
| 19     | 6      | 0    | -4.333730 | 0.616048  | -0.286189 |
| 20     | 6      | 0    | -5.697604 | 0.412698  | -0.415246 |
| 21     | 6      | 0    | -5.355090 | -1.963892 | -0.342264 |
| 22     | 6      | 0    | -6.212244 | -0.877450 | -0.445099 |
| 23     | 6      | 0    | 0.129369  | 2.468705  | 0.332947  |
| 24     | 6      | 0    | 1.138028  | 2.650368  | 1.273282  |
| 25     | 6      | 0    | 1.478929  | 3.933794  | 1.667457  |
| 26     | 6      | 0    | 0.814858  | 5.032244  | 1.138430  |
| 27     | 6      | 0    | -0.203560 | 4.839025  | 0.213971  |
| 28     | 6      | 0    | -0.552718 | 3.560909  | -0.191366 |
| 29     | 1      | 0    | -3.309670 | -2.600729 | -0.129779 |
| 30     | 1      | 0    | -5.750726 | -2.971094 | -0.365096 |
| 31     | 1      | 0    | -7.278593 | -1.034552 | -0.546459 |
| 32     | 1      | 0    | -6.363158 | 1.263087  | -0.489688 |
| 33     | 1      | 0    | -3.926218 | 1.617163  | -0.256850 |
| 34     | 1      | 0    | -1.344838 | 3.393706  | -0.907253 |
| 35     | 1      | 0    | -0.729661 | 5.689707  | -0.199296 |
| 36     | 1      | 0    | 1.084103  | 6.032464  | 1.450425  |
| 37     | 1      | 0    | 2.261545  | 4.072957  | 2.401670  |
| 38     | 1      | 0    | 1.646768  | 1.791611  | 1.690693  |
| 39     | 6      | 0    | 3.834041  | 1.472793  | -1.551378 |
| 40     | 6      | 0    | 4.699766  | 0.397089  | -1.342951 |
| 41     | 1      | 0    | 4.244116  | -3.184763 | 0.303013  |
| 42     | 1      | 0    | 3.287677  | -5.298606 | 1.021041  |
| 43     | 1      | 0    | 0.831264  | -5.549475 | 1.272391  |
| 44     | 1      | 0    | -0.645227 | -3.606665 | 0.817355  |
| 45     | 1      | 0    | 5.735960  | 0.463888  | -1.647347 |
| 46     | 1      | 0    | 4.895744  | -1.602188 | -0.677409 |
| 47     | 1      | 0    | 4.189498  | 2.374445  | -2.032551 |
| 48     | 1      | 0    | 1.859324  | 2.214406  | -1.350860 |

**1 (Cation, Gas Phase):**

| Center Number | Atomic Number | Atomic Type | Coordinates (Angstroms) |           |           |
|---------------|---------------|-------------|-------------------------|-----------|-----------|
|               |               |             | X                       | Y         | Z         |
| 1             | 6             | 0           | 2.503992                | -4.538510 | 0.761103  |
| 2             | 6             | 0           | 3.075289                | -3.323650 | 0.439102  |
| 3             | 6             | 0           | 1.118197                | -4.692945 | 0.777933  |
| 4             | 6             | 0           | 0.312678                | -3.613057 | 0.497313  |
| 5             | 6             | 0           | 0.885507                | -2.374248 | 0.187945  |
| 6             | 6             | 0           | 2.279512                | -2.216598 | 0.127541  |
| 7             | 6             | 0           | 2.850916                | -0.936620 | -0.314214 |
| 8             | 6             | 0           | 2.038169                | 0.209254  | -0.471227 |
| 9             | 6             | 0           | 0.628986                | 0.078188  | -0.146154 |
| 10            | 6             | 0           | 0.030332                | -1.218241 | -0.001962 |
| 11            | 6             | 0           | 4.202208                | -0.838352 | -0.661491 |
| 12            | 6             | 0           | 2.584020                | 1.375180  | -1.037224 |
| 13            | 7             | 0           | -0.224507               | 1.095839  | 0.046519  |
| 14            | 7             | 0           | -1.533958               | 0.970737  | 0.067292  |
| 15            | 7             | 0           | -1.273764               | -1.351388 | 0.029848  |
| 16            | 6             | 0           | -2.037822               | -0.253177 | -0.034046 |
| 17            | 6             | 0           | -3.495123               | -0.386650 | -0.145088 |
| 18            | 6             | 0           | -4.060475               | -1.654596 | -0.283691 |
| 19            | 6             | 0           | -4.314285               | 0.744254  | -0.121940 |
| 20            | 6             | 0           | -5.685221               | 0.602355  | -0.235185 |
| 21            | 6             | 0           | -5.433132               | -1.787880 | -0.399899 |
| 22            | 6             | 0           | -6.245793               | -0.661879 | -0.374706 |
| 23            | 6             | 0           | 0.202607                | 2.452344  | 0.339450  |
| 24            | 6             | 0           | 1.083882                | 2.655092  | 1.387525  |
| 25            | 6             | 0           | 1.471594                | 3.952880  | 1.677221  |
| 26            | 6             | 0           | 0.982788                | 5.012001  | 0.922043  |
| 27            | 6             | 0           | 0.087879                | 4.782725  | -0.115041 |
| 28            | 6             | 0           | -0.320832               | 3.490843  | -0.409384 |
| 29            | 1             | 0           | -3.421589               | -2.526437 | -0.300119 |
| 30            | 1             | 0           | -5.871041               | -2.770856 | -0.509570 |
| 31            | 1             | 0           | -7.319122               | -0.769213 | -0.463227 |
| 32            | 1             | 0           | -6.320019               | 1.477844  | -0.213766 |
| 33            | 1             | 0           | -3.875058               | 1.725639  | -0.007367 |
| 34            | 1             | 0           | -1.023326               | 3.287255  | -1.206419 |
| 35            | 1             | 0           | -0.298063               | 5.610360  | -0.694464 |
| 36            | 1             | 0           | 1.293290                | 6.022831  | 1.150288  |
| 37            | 1             | 0           | 2.151680                | 4.136704  | 2.497692  |
| 38            | 1             | 0           | 1.455769                | 1.817817  | 1.963998  |
| 39            | 6             | 0           | 3.913029                | 1.433857  | -1.383842 |
| 40            | 6             | 0           | 4.731632                | 0.326639  | -1.173381 |
| 41            | 1             | 0           | 4.151802                | -3.242919 | 0.441846  |
| 42            | 1             | 0           | 3.142013                | -5.378689 | 1.001991  |
| 43            | 1             | 0           | 0.679635                | -5.650361 | 1.023822  |

**1 (Anion, Gas Phase):**

| Center Number | Atomic Number | Atomic Type | Coordinates (Angstroms) |           |           |
|---------------|---------------|-------------|-------------------------|-----------|-----------|
|               |               |             | X                       | Y         | Z         |
| 1             | 6             | 0           | 2.990432                | -4.099942 | 1.102514  |
| 2             | 6             | 0           | 3.418794                | -2.964632 | 0.456117  |
| 3             | 6             | 0           | 1.644979                | -4.235853 | 1.469289  |
| 4             | 6             | 0           | 0.759285                | -3.225574 | 1.184550  |
| 5             | 6             | 0           | 1.183243                | -2.053650 | 0.534347  |
| 6             | 6             | 0           | 2.533633                | -1.913126 | 0.147098  |
| 7             | 6             | 0           | 2.954947                | -0.715263 | -0.560542 |
| 8             | 6             | 0           | 2.014135                | 0.330882  | -0.750625 |
| 9             | 6             | 0           | 0.697772                | 0.200762  | -0.223643 |
| 10            | 6             | 0           | 0.228059                | -0.987145 | 0.292089  |
| 11            | 6             | 0           | 4.249270                | -0.555093 | -1.082686 |
| 12            | 6             | 0           | 2.413514                | 1.487738  | -1.460230 |
| 13            | 7             | 0           | -0.259872               | 1.243004  | -0.298240 |
| 14            | 7             | 0           | -1.568090               | 0.830327  | -0.653997 |
| 15            | 7             | 0           | -1.094042               | -1.202952 | 0.512836  |
| 16            | 6             | 0           | -1.887940               | -0.317646 | -0.123946 |
| 17            | 6             | 0           | -3.313563               | -0.730533 | -0.320930 |
| 18            | 6             | 0           | -3.731592               | -2.007191 | 0.043532  |
| 19            | 6             | 0           | -4.246440               | 0.154722  | -0.860009 |
| 20            | 6             | 0           | -5.565422               | -0.232270 | -1.037645 |
| 21            | 6             | 0           | -5.054155               | -2.393230 | -0.129352 |
| 22            | 6             | 0           | -5.976294               | -1.509166 | -0.672134 |
| 23            | 6             | 0           | -0.146677               | 2.439405  | 0.365166  |
| 24            | 6             | 0           | 1.025646                | 2.797269  | 1.058863  |
| 25            | 6             | 0           | 1.127727                | 4.032092  | 1.676732  |
| 26            | 6             | 0           | 0.087544                | 4.951942  | 1.637230  |
| 27            | 6             | 0           | -1.078510               | 4.959072  | 0.967172  |
| 28            | 6             | 0           | -1.206839               | 3.367609  | 0.344449  |
| 29            | 1             | 0           | -2.995934               | -2.681972 | 0.459837  |
| 30            | 1             | 0           | -5.365268               | -3.390062 | 0.159746  |
| 31            | 1             | 0           | -7.007950               | -1.810705 | -0.808404 |
| 32            | 1             | 0           | -6.278862               | 0.466089  | -1.458961 |
| 33            | 1             | 0           | -3.911247               | 1.144583  | -1.138943 |
| 34            | 1             | 0           | -2.119326               | 3.095086  | -0.163290 |
| 35            | 1             | 0           | -1.912706               | 5.286866  | 0.931262  |
| 36            | 1             | 0           | 0.178965                | 5.915194  | 2.121844  |
| 37            | 1             | 0           | 2.041863                | 4.272759  | 2.207407  |
| 38            | 1             | 0           | 1.845374                | 2.096769  | 1.124388  |
| 39            | 6             | 0           | 3.684110                | 1.605837  | -1.963290 |
| 40            | 6             | 0           | 4.618486                | 0.578279  | -1.770954 |
| 41            | 1             | 0           | 4.463769                | -2.882484 | 0.190828  |
| 42            | 1             | 0           | 3.697764                | -4.889068 | 1.327835  |
| 43            | 1             | 0           | 1.308064                | -5.131924 | 1.976247  |

|    |   |   |           |           |           |    |   |   |           |           |           |
|----|---|---|-----------|-----------|-----------|----|---|---|-----------|-----------|-----------|
| 44 | 1 | 0 | -0.764361 | -3.698430 | 0.528551  | 44 | 1 | 0 | -0.286463 | -3.289834 | 1.454541  |
| 45 | 1 | 0 | 5.779373  | 0.367016  | -1.440650 | 45 | 1 | 0 | 5.622102  | 0.671163  | -2.166306 |
| 46 | 1 | 0 | 4.846612  | -1.698688 | -0.566210 | 46 | 1 | 0 | 4.977385  | -1.345712 | -0.961141 |
| 47 | 1 | 0 | 4.312815  | 2.334415  | -1.829201 | 47 | 1 | 0 | 3.964101  | 2.496452  | -2.513036 |
| 48 | 1 | 0 | 1.961984  | 2.234150  | -1.235018 | 48 | 1 | 0 | 1.687523  | 2.276367  | -1.607002 |

**1-tBu (Neutral, in DCM):**

| Center Number | Atomic Number | Atomic Type | Coordinates (Angstroms) |           |           |
|---------------|---------------|-------------|-------------------------|-----------|-----------|
|               |               |             | X                       | Y         | Z         |
| 1             | 6             | 0           | -4.361832               | -3.903460 | 1.193557  |
| 2             | 6             | 0           | -3.113246               | -4.076471 | 0.638995  |
| 3             | 6             | 0           | -4.888284               | -2.618824 | 1.362879  |
| 4             | 6             | 0           | -4.144827               | -1.523997 | 0.989116  |
| 5             | 6             | 0           | -2.863197               | -1.685538 | 0.437896  |
| 6             | 6             | 0           | -2.337444               | -2.975505 | 0.235419  |
| 7             | 6             | 0           | -1.042074               | -3.126938 | -0.422482 |
| 8             | 6             | 0           | -0.260551               | -1.984391 | -0.711122 |
| 9             | 6             | 0           | -0.745272               | -0.691591 | -0.284680 |
| 10            | 6             | 0           | -2.058754               | -0.516837 | 0.128400  |
| 11            | 6             | 0           | -0.574437               | -4.382263 | -0.845937 |
| 12            | 6             | 0           | 0.919347                | -2.134223 | -1.467340 |
| 13            | 7             | 0           | 0.028416                | 0.458048  | -0.327342 |
| 14            | 7             | 0           | -0.551052               | 1.685135  | -0.377559 |
| 15            | 7             | 0           | -2.603543               | 0.711304  | 0.271974  |
| 16            | 6             | 0           | -1.834502               | 1.740411  | -0.098981 |
| 17            | 6             | 0           | -2.465189               | 3.086935  | -0.174225 |
| 18            | 6             | 0           | -3.830138               | 3.225516  | 0.068473  |
| 19            | 6             | 0           | -1.710663               | 4.217397  | -0.490428 |
| 20            | 6             | 0           | -2.314142               | 5.463402  | -0.559439 |
| 21            | 6             | 0           | -4.431496               | 4.474234  | -0.000513 |
| 22            | 6             | 0           | -3.676163               | 5.596240  | -0.314710 |
| 23            | 6             | 0           | 1.431082                | 0.486445  | -0.086236 |
| 24            | 6             | 0           | 1.995185                | -0.367527 | 0.848341  |
| 25            | 6             | 0           | 3.364646                | -0.329780 | 1.076386  |
| 26            | 6             | 0           | 4.193539                | 0.557563  | 0.393318  |
| 27            | 6             | 0           | 3.591876                | 1.419215  | -0.530964 |
| 28            | 6             | 0           | 2.230595                | 1.393331  | -0.773701 |
| 29            | 1             | 0           | -4.415244               | 2.349121  | 0.311365  |
| 30            | 1             | 0           | -5.493061               | 4.570002  | 0.190466  |
| 31            | 1             | 0           | -4.145641               | 6.570590  | -0.370314 |
| 32            | 1             | 0           | -1.719850               | 6.334483  | -0.805716 |
| 33            | 1             | 0           | -0.650335               | 4.115459  | -0.678942 |
| 34            | 1             | 0           | 1.782862                | 2.063549  | -1.495358 |
| 35            | 1             | 0           | 4.200205                | 2.125751  | -1.082396 |
| 36            | 6             | 0           | 5.702230                | 0.623903  | 0.618800  |
| 37            | 1             | 0           | 3.774350                | -1.007836 | 1.811949  |
| 38            | 1             | 0           | 1.371268                | -1.059641 | 1.399871  |
| 39            | 6             | 0           | 1.343763                | -3.375002 | -1.879114 |
| 40            | 6             | 0           | 0.601879                | -4.512548 | -1.548169 |
| 41            | 1             | 0           | -2.732577               | -5.081468 | 0.526040  |
| 42            | 1             | 0           | -4.937061               | -4.769082 | 1.497422  |
| 43            | 1             | 0           | -5.872449               | -2.486876 | 1.794372  |
| 44            | 1             | 0           | -4.528097               | -0.522276 | 1.125276  |
| 45            | 1             | 0           | 0.935081                | -5.491980 | -1.866517 |
| 46            | 1             | 0           | -1.156163               | -5.269790 | -0.642606 |
| 47            | 1             | 0           | 2.247806                | -3.464565 | -2.467873 |
| 48            | 1             | 0           | 1.490971                | -1.263759 | -1.754623 |
| 49            | 6             | 0           | 6.172778                | -0.381763 | 1.668077  |
| 50            | 6             | 0           | 6.083143                | 2.033145  | 1.092975  |
| 51            | 6             | 0           | 6.425289                | 0.321928  | -0.701034 |
| 52            | 1             | 0           | 5.951385                | -1.409385 | 1.371496  |
| 53            | 1             | 0           | 5.710421                | -0.197315 | 2.640205  |
| 54            | 1             | 0           | 7.254110                | -0.294891 | 1.791184  |
| 55            | 1             | 0           | 5.570836                | 2.281128  | 2.025284  |
| 56            | 1             | 0           | 5.825041                | 2.790722  | 0.351176  |
| 57            | 1             | 0           | 7.159974                | 2.087753  | 1.269675  |
| 58            | 1             | 0           | 6.163860                | 1.042581  | -1.477606 |
| 59            | 1             | 0           | 6.170003                | -0.676551 | -1.063087 |
| 60            | 1             | 0           | 7.506713                | 0.364829  | -0.551617 |

**2 (Neutral, in DCM):**

| Center Number | Atomic Number | Atomic Type | Coordinates (Angstroms) |           |           |
|---------------|---------------|-------------|-------------------------|-----------|-----------|
|               |               |             | X                       | Y         | Z         |
| 1             | 6             | 0           | -6.467032               | -1.255844 | -0.032839 |
| 2             | 6             | 0           | -5.466295               | -2.202956 | 0.108482  |
| 3             | 6             | 0           | -4.120348               | -1.820410 | 0.111980  |
| 4             | 6             | 0           | -3.791743               | -0.449824 | -0.027490 |
| 5             | 6             | 0           | -4.822994               | 0.513257  | -0.174641 |
| 6             | 6             | 0           | -6.150761               | 0.090746  | -0.174391 |
| 7             | 6             | 0           | -3.056900               | -2.772005 | 0.248395  |
| 8             | 6             | 0           | -2.428311               | -0.042097 | -0.026153 |
| 9             | 6             | 0           | -1.405557               | -1.004132 | 0.104817  |
| 10            | 6             | 0           | -1.759680               | -2.384434 | 0.240168  |
| 11            | 6             | 0           | -0.049317               | -0.588226 | 0.090754  |
| 12            | 6             | 0           | 0.239435                | 0.796689  | -0.010033 |
| 13            | 6             | 0           | -0.774187               | 1.736562  | -0.166385 |
| 14            | 6             | 0           | -2.104570               | 1.335441  | -0.174063 |
| 15            | 6             | 0           | -3.169537               | 2.287524  | -0.326202 |
| 16            | 6             | 0           | -4.462365               | 1.897758  | -0.324550 |
| 17            | 1             | 0           | -5.258295               | 2.624550  | -0.437974 |

**2 (Neutral, Gas Phase):**

| Center Number | Atomic Number | Atomic Type | Coordinates (Angstroms) |           |           |
|---------------|---------------|-------------|-------------------------|-----------|-----------|
|               |               |             | X                       | Y         | Z         |
| 1             | 6             | 0           | -6.467882               | -1.243733 | -0.013632 |
| 2             | 6             | 0           | -5.466319               | -2.189344 | 0.120739  |
| 3             | 6             | 0           | -4.120743               | -1.808598 | 0.115404  |
| 4             | 6             | 0           | -3.793965               | -0.438498 | -0.026742 |
| 5             | 6             | 0           | -4.825567               | 0.523548  | -0.169311 |
| 6             | 6             | 0           | -6.152615               | 0.101409  | -0.158975 |
| 7             | 6             | 0           | -3.056389               | -2.758934 | 0.245038  |
| 8             | 6             | 0           | -2.431050               | -0.031265 | -0.032554 |
| 9             | 6             | 0           | -1.409395               | -0.992701 | 0.094715  |
| 10            | 6             | 0           | -1.759917               | -2.371994 | 0.230608  |
| 11            | 6             | 0           | -0.051569               | -0.580996 | 0.079048  |
| 12            | 6             | 0           | 0.239942                | 0.803442  | -0.023499 |
| 13            | 6             | 0           | -0.773652               | 1.742042  | -0.184600 |
| 14            | 6             | 0           | -2.105657               | 1.344565  | -0.186391 |
| 15            | 6             | 0           | -3.170879               | 2.294261  | -0.337870 |
| 16            | 6             | 0           | -4.463451               | 1.905588  | -0.326615 |
| 17            | 1             | 0           | -5.257544               | 2.633925  | -0.439610 |

|    |   |   |           |           |           |
|----|---|---|-----------|-----------|-----------|
| 18 | 1 | 0 | -2.906399 | 3.332556  | -0.440695 |
| 19 | 1 | 0 | -3.316205 | -3.818776 | 0.356973  |
| 20 | 1 | 0 | -7.504605 | -1.565981 | -0.034847 |
| 21 | 1 | 0 | -5.714794 | -3.252314 | 0.216336  |
| 22 | 1 | 0 | -6.937531 | 0.827314  | -0.288338 |
| 23 | 1 | 0 | -0.965314 | -3.111145 | 0.341853  |
| 24 | 1 | 0 | -0.541334 | 2.784669  | -0.290520 |
| 25 | 7 | 0 | 0.943988  | -1.509269 | 0.145025  |
| 26 | 7 | 0 | 1.582200  | 1.136469  | 0.029990  |
| 27 | 6 | 0 | 2.190789  | -1.055127 | 0.051939  |
| 28 | 7 | 0 | 2.561015  | 0.213435  | -0.004253 |
| 29 | 6 | 0 | 3.296601  | -2.051145 | 0.007773  |
| 30 | 6 | 0 | 4.631263  | -1.644318 | -0.004765 |
| 31 | 6 | 0 | 3.000856  | -3.412964 | -0.026679 |
| 32 | 6 | 0 | 5.648905  | -2.584640 | -0.053278 |
| 33 | 1 | 0 | 4.867363  | -0.589230 | 0.024677  |
| 34 | 6 | 0 | 4.021358  | -4.351552 | -0.075289 |
| 35 | 1 | 0 | 1.967159  | -3.730624 | -0.018168 |
| 36 | 6 | 0 | 5.347846  | -3.941272 | -0.088978 |
| 37 | 1 | 0 | 6.681153  | -2.257270 | -0.061775 |
| 38 | 1 | 0 | 3.778977  | -5.406658 | -0.102628 |
| 39 | 1 | 0 | 6.144198  | -4.674316 | -0.127505 |
| 40 | 6 | 0 | 2.042087  | 2.488083  | 0.056006  |
| 41 | 6 | 0 | 2.988486  | 2.897585  | -0.873545 |
| 42 | 6 | 0 | 1.573845  | 3.359506  | 1.031873  |
| 43 | 6 | 0 | 3.458067  | 4.202236  | -0.832713 |
| 44 | 1 | 0 | 3.346935  | 2.196065  | -1.615552 |
| 45 | 6 | 0 | 2.046907  | 4.662687  | 1.060535  |
| 46 | 1 | 0 | 0.855473  | 3.013539  | 1.764400  |
| 47 | 6 | 0 | 2.986480  | 5.087020  | 0.129246  |
| 48 | 1 | 0 | 4.192094  | 4.529227  | -1.558128 |
| 49 | 1 | 0 | 1.686784  | 5.344229  | 1.820549  |
| 50 | 1 | 0 | 3.353955  | 6.104845  | 0.156168  |

|    |   |   |           |           |           |
|----|---|---|-----------|-----------|-----------|
| 18 | 1 | 0 | -2.910955 | 3.338979  | -0.459835 |
| 19 | 1 | 0 | -3.313934 | -3.805720 | 0.354416  |
| 20 | 1 | 0 | -7.504786 | -1.554364 | -0.007853 |
| 21 | 1 | 0 | -5.715329 | -3.237932 | 0.230984  |
| 22 | 1 | 0 | -6.940672 | 0.836753  | -0.268834 |
| 23 | 1 | 0 | -0.957753 | -3.090013 | 0.327420  |
| 24 | 1 | 0 | -0.536430 | 2.787432  | -0.321472 |
| 25 | 7 | 0 | 0.934677  | -1.504647 | 0.136968  |
| 26 | 7 | 0 | 1.585973  | 1.136665  | 0.014968  |
| 27 | 6 | 0 | 2.183741  | -1.057304 | 0.031781  |
| 28 | 7 | 0 | 2.561240  | 0.208735  | -0.035223 |
| 29 | 6 | 0 | 3.280965  | -2.059244 | -0.002061 |
| 30 | 6 | 0 | 4.616978  | -1.661328 | -0.017899 |
| 31 | 6 | 0 | 2.973384  | -3.417403 | -0.017121 |
| 32 | 6 | 0 | 5.626353  | -2.609689 | -0.049772 |
| 33 | 1 | 0 | 4.853149  | -0.606303 | -0.000201 |
| 34 | 6 | 0 | 3.986003  | -4.363579 | -0.040969 |
| 35 | 1 | 0 | 1.934740  | -3.717175 | -0.004130 |
| 36 | 6 | 0 | 5.314715  | -3.963369 | -0.065908 |
| 37 | 1 | 0 | 6.661039  | -2.291494 | -0.059933 |
| 38 | 1 | 0 | 3.736861  | -5.416936 | -0.061115 |
| 39 | 1 | 0 | 6.105511  | -4.702283 | -0.091001 |
| 40 | 6 | 0 | 2.055029  | 2.481091  | 0.052939  |
| 41 | 6 | 0 | 3.057029  | 2.872190  | -0.825103 |
| 42 | 6 | 0 | 1.551455  | 3.371428  | 0.993996  |
| 43 | 6 | 0 | 3.539138  | 4.170500  | -0.773750 |
| 44 | 1 | 0 | 3.450125  | 2.152025  | -1.529445 |
| 45 | 6 | 0 | 2.037875  | 4.668534  | 1.034257  |
| 46 | 1 | 0 | 0.795992  | 3.041309  | 1.694949  |
| 47 | 6 | 0 | 3.028699  | 5.072941  | 0.149938  |
| 48 | 1 | 0 | 4.316617  | 4.478508  | -1.460502 |
| 49 | 1 | 0 | 1.649427  | 5.360869  | 1.769634  |
| 50 | 1 | 0 | 3.407244  | 6.085793  | 0.186154  |

**2 (Cation, Gas Phase):**

| Center Number | Atomic Number | Atomic Type | Coordinates (Angstroms) |           |           |
|---------------|---------------|-------------|-------------------------|-----------|-----------|
|               |               |             | X                       | Y         | Z         |
| 1             | 6             | 0           | -6.454694               | -1.250305 | -0.017382 |
| 2             | 6             | 0           | -5.465218               | -2.199723 | 0.084804  |
| 3             | 6             | 0           | -4.107968               | -1.823367 | 0.082395  |
| 4             | 6             | 0           | -3.776951               | -0.453299 | -0.023957 |
| 5             | 6             | 0           | -4.805363               | 0.516409  | -0.133851 |
| 6             | 6             | 0           | -6.127340               | 0.105071  | -0.128363 |
| 7             | 6             | 0           | -3.061838               | -2.780189 | 0.180650  |
| 8             | 6             | 0           | -2.416487               | -0.055924 | -0.025472 |
| 9             | 6             | 0           | -1.415602               | -1.029111 | 0.068776  |
| 10            | 6             | 0           | -1.754771               | -2.400202 | 0.170044  |
| 11            | 6             | 0           | -0.039306               | -0.604507 | 0.047062  |
| 12            | 6             | 0           | 0.251524                | 0.804083  | -0.020899 |
| 13            | 6             | 0           | -0.765410               | 1.757179  | -0.135925 |
| 14            | 6             | 0           | -2.082213               | 1.343437  | -0.141655 |
| 15            | 6             | 0           | -3.149321               | 2.297397  | -0.261433 |
| 16            | 6             | 0           | -4.438676               | 1.903527  | -0.254149 |
| 17            | 1             | 0           | -5.232532               | 2.635582  | -0.342399 |
| 18            | 1             | 0           | -2.891354               | 3.344379  | -0.354508 |
| 19            | 1             | 0           | -3.322978               | -3.828089 | 0.263269  |
| 20            | 1             | 0           | -7.494007               | -1.550416 | -0.014716 |
| 21            | 1             | 0           | -5.718485               | -3.249403 | 0.167683  |
| 22            | 1             | 0           | -6.913833               | 0.844988  | -0.213950 |
| 23            | 1             | 0           | -0.959931               | -3.128652 | 0.243254  |
| 24            | 1             | 0           | -0.528926               | 2.805917  | -0.234189 |
| 25            | 7             | 0           | 0.931282                | -1.490149 | 0.072512  |
| 26            | 7             | 0           | 1.575013                | 1.110872  | 0.013161  |
| 27            | 6             | 0           | 2.197316                | -1.065227 | 0.025320  |
| 28            | 7             | 0           | 2.530548                | 0.227688  | 0.014750  |
| 29            | 6             | 0           | 3.294423                | -2.044422 | 0.005720  |
| 30            | 6             | 0           | 4.625369                | -1.622977 | 0.007872  |
| 31            | 6             | 0           | 2.997848                | -3.407254 | -0.015490 |
| 32            | 6             | 0           | 5.644142                | -2.559136 | -0.011270 |
| 33            | 1             | 0           | 4.856423                | -0.567021 | 0.029130  |
| 34            | 6             | 0           | 4.022459                | -4.337547 | -0.035021 |
| 35            | 1             | 0           | 1.966100                | -3.729687 | -0.017162 |
| 36            | 6             | 0           | 5.345473                | -3.915926 | -0.032940 |
| 37            | 1             | 0           | 6.674780                | -2.230531 | -0.007714 |
| 38            | 1             | 0           | 3.789592                | -5.393756 | -0.051653 |
| 39            | 1             | 0           | 6.145459                | -4.644549 | -0.047871 |
| 40            | 6             | 0           | 2.033960                | 2.485202  | 0.039423  |
| 41            | 6             | 0           | 2.901206                | 2.908282  | -0.952466 |
| 42            | 6             | 0           | 1.628847                | 3.311486  | 1.075540  |
| 43            | 6             | 0           | 3.359229                | 4.216300  | -0.913642 |
| 44            | 1             | 0           | 3.208052                | 2.225262  | -1.733388 |
| 45            | 6             | 0           | 2.103455                | 4.612986  | 1.105386  |
| 46            | 1             | 0           | 0.969246                | 2.938609  | 1.848744  |
| 47            | 6             | 0           | 2.960717                | 5.065243  | 0.110347  |
| 48            | 1             | 0           | 4.030767                | 4.570199  | -1.683944 |
| 49            | 1             | 0           | 1.809288                | 5.270143  | 1.912310  |
| 50            | 1             | 0           | 3.325579                | 6.083226  | 0.137581  |

**2 (Anion, Gas Phase):**

| Center Number | Atomic Number | Atomic Type | Coordinates (Angstroms) |           |           |
|---------------|---------------|-------------|-------------------------|-----------|-----------|
|               |               |             | X                       | Y         | Z         |
| 1             | 6             | 0           | -6.475866               | -1.178341 | 0.109232  |
| 2             | 6             | 0           | -5.478991               | -2.077435 | 0.471708  |
| 3             | 6             | 0           | -4.133890               | -1.712135 | 0.408675  |
| 4             | 6             | 0           | -3.791550               | -0.401821 | -0.026121 |
| 5             | 6             | 0           | -4.817153               | 0.509594  | -0.401279 |
| 6             | 6             | 0           | -6.155139               | 0.094950  | -0.323674 |
| 7             | 6             | 0           | -3.072799               | -2.614450 | 0.759881  |
| 8             | 6             | 0           | -2.424662               | -0.007949 | -0.093130 |
| 9             | 6             | 0           | -1.401661               | -0.924936 | 0.260372  |
| 10            | 6             | 0           | -1.774632               | -2.237623 | 0.680126  |
| 11            | 6             | 0           | -0.038675               | -0.544557 | 0.196932  |
| 12            | 6             | 0           | 0.254186                | 0.814318  | -0.133773 |
| 13            | 6             | 0           | -0.732760               | 1.669647  | -0.558392 |
| 14            | 6             | 0           | -2.091911               | 1.291711  | -0.533252 |
| 15            | 6             | 0           | -3.135330               | 2.180365  | -0.907487 |
| 16            | 6             | 0           | -4.443869               | 1.813713  | -0.847855 |
| 17            | 1             | 0           | -5.226381               | 2.505151  | -1.138156 |
| 18            | 1             | 0           | -2.862846               | 3.175019  | -1.245017 |
| 19            | 1             | 0           | -3.338837               | -3.613739 | 1.085691  |
| 20            | 1             | 0           | -7.515215               | -1.480914 | 0.163128  |
| 21            | 1             | 0           | -5.738009               | -3.076082 | 0.804122  |
| 22            | 1             | 0           | -6.936716               | 0.789360  | -0.610419 |
| 23            | 1             | 0           | -0.973833               | -2.918010 | 0.939640  |
| 24            | 1             | 0           | -0.477599               | 2.671398  | -0.880059 |
| 25            | 7             | 0           | 0.948319                | -1.442194 | 0.399516  |
| 26            | 7             | 0           | 1.609241                | 1.169956  | -0.001263 |
| 27            | 6             | 0           | 2.179863                | -1.020711 | 0.040969  |
| 28            | 7             | 0           | 2.575628                | 0.183454  | -0.239359 |
| 29            | 6             | 0           | 3.229703                | -2.076581 | -0.088232 |
| 30            | 6             | 0           | 4.573096                | -1.738530 | -0.247997 |
| 31            | 6             | 0           | 2.875529                | -3.421804 | -0.040270 |
| 32            | 6             | 0           | 5.538804                | -2.725301 | -0.365285 |
| 33            | 1             | 0           | 4.840720                | -0.690548 | -0.271958 |
| 34            | 6             | 0           | 3.843622                | -4.410562 | -0.159113 |
| 35            | 1             | 0           | 1.803303                | -3.666839 | 0.090862  |
| 36            | 6             | 0           | 5.178063                | -4.067506 | -0.323176 |
| 37            | 1             | 0           | 6.578978                | -2.448158 | -0.487780 |
| 38            | 1             | 0           | 3.553120                | -5.453834 | -0.123541 |
| 39            | 1             | 0           | 5.933473                | -4.838522 | -0.416163 |
| 40            | 6             | 0           | 2.089593                | 2.457184  | 0.141577  |
| 41            | 6             | 0           | 3.395362                | 2.775924  | -0.269042 |
| 42            | 6             | 0           | 1.329854                | 3.469119  | 0.756607  |
| 43            | 6             | 0           | 3.895044                | 4.055679  | -0.096536 |
| 44            | 1             | 0           | 3.995792                | 2.001053  | -0.719486 |
| 45            | 6             | 0           | 1.850170                | 4.739164  | 0.923737  |
| 46            | 1             | 0           | 0.340796                | 3.243483  | 1.128357  |
| 47            | 6             | 0           | 3.133901                | 5.056483  | 0.492520  |
| 48            | 1             | 0           | 4.902649                | 4.271672  | -0.432976 |
| 49            | 1             | 0           | 1.241451                | 5.491429  | 1.411702  |
| 50            | 1             | 0           | 3.532415                | 6.053906  | 0.623467  |

**3 (Neutral, in DCM):**

| Center Number | Atomic Number | Atomic Type | Coordinates (Angstroms) |   |   |
|---------------|---------------|-------------|-------------------------|---|---|
|               |               |             | X                       | Y | Z |

**3 (Neutral, Gas Phase):**

| Center Number | Atomic Number | Atomic Type | Coordinates (Angstroms) |   |   |
|---------------|---------------|-------------|-------------------------|---|---|
|               |               |             | X                       | Y | Z |

|    |    |   |           |           |           |
|----|----|---|-----------|-----------|-----------|
| 1  | 7  | 0 | 2.005658  | 0.979623  | 0.029879  |
| 2  | 7  | 0 | 3.112610  | 0.220744  | -0.023248 |
| 3  | 7  | 0 | 1.795943  | -1.739137 | 0.158547  |
| 4  | 6  | 0 | 2.945847  | -1.096494 | 0.045028  |
| 5  | 6  | 0 | 4.200396  | -1.899450 | 0.012355  |
| 6  | 6  | 0 | 4.132625  | -3.291550 | 0.011375  |
| 7  | 6  | 0 | 5.449166  | -1.278472 | -0.015825 |
| 8  | 6  | 0 | 6.608444  | -2.039227 | -0.044133 |
| 9  | 6  | 0 | 5.294138  | -0.409900 | -0.017893 |
| 10 | 6  | 0 | 6.535074  | -3.426815 | -0.045244 |
| 11 | 6  | 0 | 2.258134  | 2.386948  | 0.028261  |
| 12 | 6  | 0 | 3.081668  | 2.917351  | -0.955513 |
| 13 | 6  | 0 | 3.361266  | 4.275612  | -0.944520 |
| 14 | 6  | 0 | 2.823388  | 5.092787  | 0.042005  |
| 15 | 6  | 0 | 2.006682  | 4.548596  | 1.025347  |
| 16 | 6  | 0 | 1.722676  | 3.190643  | 1.025747  |
| 17 | 1  | 0 | 3.165140  | -3.774313 | 0.033781  |
| 18 | 1  | 0 | 5.228944  | -5.130791 | -0.019346 |
| 19 | 1  | 0 | 7.441383  | -4.019223 | -0.066562 |
| 20 | 1  | 0 | 7.572482  | -1.546358 | -0.064295 |
| 21 | 1  | 0 | 5.508165  | -0.198624 | -0.011935 |
| 22 | 1  | 0 | 1.101757  | 2.753567  | 1.797588  |
| 23 | 1  | 0 | 1.597471  | 5.179447  | 1.803976  |
| 24 | 1  | 0 | 3.045204  | 6.152303  | 0.048108  |
| 25 | 1  | 0 | 4.001146  | 4.695276  | -1.710118 |
| 26 | 1  | 0 | 3.494682  | 2.264655  | -1.713523 |
| 27 | 6  | 0 | -0.584674 | -1.603631 | 0.166304  |
| 28 | 6  | 0 | -1.736431 | -0.835896 | 0.088031  |
| 29 | 6  | 0 | -1.637952 | 0.566891  | -0.042572 |
| 30 | 6  | 0 | 0.659533  | -0.980183 | 0.129761  |
| 31 | 6  | 0 | 0.730831  | 0.441795  | 0.035339  |
| 32 | 6  | 0 | -0.418194 | 1.220118  | -0.072733 |
| 33 | 1  | 0 | -0.361103 | 2.292746  | -0.186399 |
| 34 | 16 | 0 | -3.225294 | 1.238711  | -0.154218 |
| 35 | 7  | 0 | -3.023943 | -1.325336 | 0.102245  |
| 36 | 1  | 0 | -0.635839 | -2.682069 | 0.240969  |
| 37 | 6  | 0 | -3.895717 | -0.381755 | -0.013622 |
| 38 | 6  | 0 | -5.347363 | -0.606179 | -0.035963 |
| 39 | 6  | 0 | -6.248664 | 0.451629  | -0.153182 |
| 40 | 6  | 0 | -7.613523 | 0.207441  | -0.171839 |
| 41 | 6  | 0 | -8.089802 | -1.093331 | -0.074192 |
| 42 | 6  | 0 | -7.195456 | -2.151660 | 0.042356  |
| 43 | 6  | 0 | -5.831889 | -1.912701 | 0.061221  |
| 44 | 1  | 0 | -5.893843 | 1.473188  | -0.229208 |
| 45 | 1  | 0 | -8.305552 | 1.034772  | -0.262504 |
| 46 | 1  | 0 | -9.155649 | -1.282962 | -0.088770 |
| 47 | 1  | 0 | -7.563340 | -3.167016 | 0.118035  |
| 48 | 1  | 0 | -5.129436 | -2.730641 | 0.150341  |

|    |    |   |           |           |           |
|----|----|---|-----------|-----------|-----------|
| 1  | 7  | 0 | 2.011128  | 0.983842  | 0.051295  |
| 2  | 7  | 0 | 3.117740  | 0.223143  | -0.014565 |
| 3  | 7  | 0 | 1.795485  | -1.731717 | 0.210851  |
| 4  | 6  | 0 | 2.945264  | -1.094061 | 0.072069  |
| 5  | 6  | 0 | 4.191807  | -1.903200 | 0.015734  |
| 6  | 6  | 0 | 4.108991  | -3.293239 | 0.011257  |
| 7  | 6  | 0 | 5.443187  | -1.291911 | -0.034898 |
| 8  | 6  | 0 | 6.593505  | -2.062837 | -0.091519 |
| 9  | 6  | 0 | 5.261856  | -0.460912 | -0.045963 |
| 10 | 6  | 0 | 6.506603  | -3.448755 | -0.097647 |
| 11 | 6  | 0 | 2.264228  | 2.387315  | 0.044357  |
| 12 | 6  | 0 | 3.138441  | 2.906965  | -0.900820 |
| 13 | 6  | 0 | 3.414679  | 4.264900  | -0.897868 |
| 14 | 6  | 0 | 2.826435  | 5.097766  | 0.044364  |
| 15 | 6  | 0 | 1.964802  | 4.566465  | 0.994663  |
| 16 | 6  | 0 | 1.683434  | 3.208923  | 1.001863  |
| 17 | 1  | 0 | 3.132366  | -3.756806 | 0.054293  |
| 18 | 1  | 0 | 5.187934  | -5.140782 | -0.050000 |
| 19 | 1  | 0 | 7.406491  | -4.049116 | -0.140455 |
| 20 | 1  | 0 | 7.561698  | -1.580195 | -0.129503 |
| 21 | 1  | 0 | 5.503978  | -0.212471 | -0.025457 |
| 22 | 1  | 0 | 1.029325  | 2.782367  | 1.751292  |
| 23 | 1  | 0 | 1.519121  | 5.207850  | 1.743574  |
| 24 | 1  | 0 | 3.045315  | 6.157333  | 0.044141  |
| 25 | 1  | 0 | 4.093299  | 4.673080  | -1.635264 |
| 26 | 1  | 0 | 3.595637  | 2.238217  | -1.617155 |
| 27 | 6  | 0 | -0.583846 | -1.592639 | 0.216453  |
| 28 | 6  | 0 | -1.735649 | -0.829732 | 0.111357  |
| 29 | 6  | 0 | -1.636439 | 0.570077  | -0.052436 |
| 30 | 6  | 0 | 0.662569  | -0.972391 | 0.172329  |
| 31 | 6  | 0 | 0.733836  | 0.447443  | 0.053774  |
| 32 | 6  | 0 | -0.414971 | 1.220727  | -0.085886 |
| 33 | 1  | 0 | -0.354203 | 2.289205  | -0.228802 |
| 34 | 16 | 0 | -3.221411 | 1.239078  | -0.193841 |
| 35 | 7  | 0 | -3.022747 | -1.320095 | 0.127192  |
| 36 | 1  | 0 | -0.632624 | -2.668242 | 0.312387  |
| 37 | 6  | 0 | -3.890794 | -0.380856 | -0.018851 |
| 38 | 6  | 0 | -5.342200 | -0.604964 | -0.044675 |
| 39 | 6  | 0 | -6.242032 | 0.445116  | -0.214596 |
| 40 | 6  | 0 | -7.606094 | 0.200624  | -0.234000 |
| 41 | 6  | 0 | -8.082308 | -1.094136 | -0.083739 |
| 42 | 6  | 0 | -7.188846 | -2.145046 | 0.085649  |
| 43 | 6  | 0 | -5.826098 | -1.905400 | 0.105394  |
| 44 | 1  | 0 | -5.880322 | 1.459710  | -0.332786 |
| 45 | 1  | 0 | -8.297857 | 1.021928  | -0.366625 |
| 46 | 1  | 0 | -9.147578 | -1.284510 | -0.098807 |
| 47 | 1  | 0 | -7.558005 | -3.155616 | 0.202398  |
| 48 | 1  | 0 | -5.116323 | -2.710859 | 0.235908  |

### 3 (Cation, Gas Phase):

| Center Number | Atomic Number | Atomic Type | Coordinates (Angstroms) |           |           |
|---------------|---------------|-------------|-------------------------|-----------|-----------|
|               |               |             | X                       | Y         | Z         |
| 1             | 7             | 0           | 1.992673                | 0.952121  | 0.031278  |
| 2             | 7             | 0           | 3.071652                | 0.242045  | 0.027031  |
| 3             | 7             | 0           | 1.787227                | -1.724516 | 0.133512  |
| 4             | 6             | 0           | 2.951989                | -1.102733 | 0.055058  |
| 5             | 6             | 0           | 4.201739                | -1.876034 | 0.017283  |
| 6             | 6             | 0           | 4.141500                | -3.269736 | -0.006263 |
| 7             | 6             | 0           | 5.439740                | -1.231444 | 0.001454  |
| 8             | 6             | 0           | 6.604190                | -1.978754 | -0.037804 |
| 9             | 6             | 0           | 5.310452                | -4.009147 | -0.046771 |
| 10            | 6             | 0           | 6.541585                | -3.366060 | -0.062287 |
| 11            | 6             | 0           | 2.224049                | 2.385872  | 0.033737  |
| 12            | 6             | 0           | 2.992115                | 2.923488  | -0.984076 |
| 13            | 6             | 0           | 3.239064                | 4.287322  | -0.970552 |
| 14            | 6             | 0           | 2.736548                | 5.077075  | 0.055065  |
| 15            | 6             | 0           | 1.983448                | 4.510946  | 1.075815  |
| 16            | 6             | 0           | 1.717355                | 3.150597  | 1.071753  |
| 17            | 1             | 0           | 3.179780                | -3.763161 | 0.007266  |
| 18            | 1             | 0           | 5.262167                | -5.089508 | -0.066080 |
| 19            | 1             | 0           | 7.454004                | -3.947148 | -0.092296 |
| 20            | 1             | 0           | 7.563054                | -1.478266 | -0.047586 |
| 21            | 1             | 0           | 5.487735                | -0.151740 | 0.024922  |
| 22            | 1             | 0           | 1.148279                | 2.688686  | 1.868669  |
| 23            | 1             | 0           | 1.611102                | 5.125625  | 1.883913  |
| 24            | 1             | 0           | 2.939359                | 6.139583  | 0.063787  |
| 25            | 1             | 0           | 3.828643                | 4.731354  | -1.760990 |
| 26            | 1             | 0           | 3.384030                | 2.284859  | -1.764402 |
| 27            | 6             | 0           | -0.584591               | -1.637746 | 0.162989  |
| 28            | 6             | 0           | -1.716302               | -0.872274 | 0.082553  |
| 29            | 6             | 0           | -1.620501               | 0.565408  | -0.057954 |
| 30            | 6             | 0           | 0.670729                | -1.000460 | 0.115067  |
| 31            | 6             | 0           | 0.736991                | 0.434947  | 0.024727  |
| 32            | 6             | 0           | -0.423694               | 1.224279  | -0.086332 |
| 33            | 1             | 0           | -0.361847               | 2.295575  | -0.203631 |
| 34            | 16            | 0           | -3.202146               | 1.227970  | -0.177533 |
| 35            | 7             | 0           | -2.995037               | -1.354465 | 0.099002  |
| 36            | 1             | 0           | -0.629941               | -2.714677 | 0.240357  |
| 37            | 6             | 0           | -3.868207               | -0.413157 | -0.023080 |
| 38            | 6             | 0           | -5.309422               | -0.622656 | -0.037827 |
| 39            | 6             | 0           | -6.197759               | 0.443371  | -0.191051 |
| 40            | 6             | 0           | -7.561608               | 0.212012  | -0.198264 |
| 41            | 6             | 0           | -8.044163               | -1.082397 | -0.052172 |
| 42            | 6             | 0           | -7.163739               | -2.147797 | 0.100275  |
| 43            | 6             | 0           | -5.800032               | -1.924078 | 0.107585  |
| 44            | 1             | 0           | -5.831050               | 1.456721  | -0.306092 |

### 3 (Anion, Gas Phase):

| Center Number | Atomic Number | Atomic Type | Coordinates (Angstroms) |           |           |
|---------------|---------------|-------------|-------------------------|-----------|-----------|
|               |               |             | X                       | Y         | Z         |
| 1             | 7             | 0           | 2.025377                | 1.030156  | 0.015340  |
| 2             | 7             | 0           | 3.122280                | 0.189339  | -0.260474 |
| 3             | 7             | 0           | 1.814667                | -1.632656 | 0.561085  |
| 4             | 6             | 0           | 2.929579                | -1.048007 | 0.110575  |
| 5             | 6             | 0           | 4.131271                | -1.931557 | -0.024831 |
| 6             | 6             | 0           | 4.015485                | -3.299061 | 0.207907  |
| 7             | 6             | 0           | 5.376424                | -1.410908 | -0.373787 |
| 8             | 6             | 0           | 6.479073                | -2.242331 | -0.496077 |
| 9             | 6             | 0           | 5.120828                | -4.131039 | 0.089659  |
| 10            | 6             | 0           | 6.356399                | -3.607745 | -0.265017 |
| 11            | 6             | 0           | 2.314358                | 2.378519  | 0.095774  |
| 12            | 6             | 0           | 3.524612                | 2.874430  | -0.419365 |
| 13            | 6             | 0           | 3.836019                | 4.219469  | -0.311976 |
| 14            | 6             | 0           | 2.977307                | 5.114032  | 0.131213  |
| 15            | 6             | 0           | 1.791753                | 4.622915  | 0.850263  |
| 16            | 6             | 0           | 1.459499                | 3.285019  | 0.749254  |
| 17            | 1             | 0           | 3.042091                | -3.682636 | 0.482106  |
| 18            | 1             | 0           | 5.015861                | -5.193592 | 0.274660  |
| 19            | 1             | 0           | 7.218900                | -4.257014 | -0.357443 |
| 20            | 1             | 0           | 7.440525                | -1.824127 | -0.769772 |
| 21            | 1             | 0           | 5.459121                | -0.345420 | -0.541497 |
| 22            | 1             | 0           | 0.549205                | 2.924874  | 1.206455  |
| 23            | 1             | 0           | 1.115259                | 5.290732  | 1.370905  |
| 24            | 1             | 0           | 3.228521                | 6.163530  | 0.392484  |
| 25            | 1             | 0           | 4.772705                | 4.573161  | -0.727704 |
| 26            | 1             | 0           | 4.200387                | 2.180892  | -0.894850 |
| 27            | 6             | 0           | -0.579957               | -1.492560 | 0.499803  |
| 28            | 6             | 0           | -1.740672               | -0.763897 | 0.207126  |
| 29            | 6             | 0           | -1.632076               | 0.555105  | -0.252768 |
| 30            | 6             | 0           | 0.671325                | -0.906115 | 0.371509  |
| 31            | 6             | 0           | 0.741203                | 0.478248  | -0.008130 |
| 32            | 6             | 0           | -0.387918               | 1.180057  | -0.381810 |
| 33            | 1             | 0           | -0.311502               | 2.198118  | -0.735155 |
| 34            | 16            | 0           | -3.209691               | 1.185963  | -0.555619 |
| 35            | 7             | 0           | -3.031151               | -1.232981 | 0.306964  |
| 36            | 1             | 0           | -0.645909               | -2.525123 | 0.814126  |
| 37            | 6             | 0           | -3.896794               | -0.343173 | -0.054614 |
| 38            | 6             | 0           | -5.345748               | -0.572635 | -0.051973 |
| 39            | 6             | 0           | -6.250272               | 0.400769  | -0.477845 |
| 40            | 6             | 0           | -7.614130               | 0.153826  | -0.461012 |
| 41            | 6             | 0           | -8.098761               | -1.069817 | -0.018931 |
| 42            | 6             | 0           | -7.203654               | -2.044867 | 0.406656  |
| 43            | 6             | 0           | -5.841046               | -1.802148 | 0.391385  |
| 44            | 1             | 0           | -5.883990               | 1.358789  | -0.827356 |

|    |   |   |           |           |           |
|----|---|---|-----------|-----------|-----------|
| 45 | 1 | 0 | -8.249085 | 1.038169  | -0.317374 |
| 46 | 1 | 0 | -9.111328 | -1.261882 | -0.057513 |
| 47 | 1 | 0 | -7.545271 | -3.153551 | 0.213245  |
| 48 | 1 | 0 | -5.099749 | -2.739531 | 0.225011  |

|    |   |   |           |           |           |
|----|---|---|-----------|-----------|-----------|
| 45 | 1 | 0 | -8.300989 | 0.920824  | -0.796572 |
| 46 | 1 | 0 | -9.163969 | -1.262392 | -0.005909 |
| 47 | 1 | 0 | -7.572031 | -3.002128 | 0.754581  |
| 48 | 1 | 0 | -5.132000 | -2.550078 | 0.720498  |

**4 (Neutral, in DCM):**

| Center Number | Atomic Number | Atomic Type | Coordinates (Angstroms) |           |           |
|---------------|---------------|-------------|-------------------------|-----------|-----------|
|               |               |             | X                       | Y         | Z         |
| 1             | 7             | 0           | 0.699965                | -0.218721 | 0.001479  |
| 2             | 7             | 0           | -0.576195               | -0.624205 | 0.004584  |
| 3             | 7             | 0           | -1.296334               | 1.646243  | -0.011843 |
| 4             | 6             | 0           | -1.499976               | 0.337901  | -0.004265 |
| 5             | 6             | 0           | -2.908497               | -0.147427 | -0.005625 |
| 6             | 6             | 0           | -3.954227               | 0.765247  | 0.123670  |
| 7             | 6             | 0           | -3.202213               | -1.505430 | -0.133750 |
| 8             | 6             | 0           | -4.519029               | -1.939999 | -0.129994 |
| 9             | 6             | 0           | -5.270284               | 0.327401  | 0.129435  |
| 10            | 6             | 0           | -5.557154               | -1.025815 | 0.003133  |
| 11            | 6             | 0           | 1.718125                | -1.182059 | 0.013013  |
| 12            | 6             | 0           | 1.441818                | -2.545357 | 0.029431  |
| 13            | 6             | 0           | 2.483199                | -3.458380 | 0.040482  |
| 14            | 6             | 0           | 3.801244                | -3.018934 | 0.035294  |
| 15            | 6             | 0           | 4.082110                | -1.660358 | 0.019094  |
| 16            | 6             | 0           | 3.046396                | -0.745090 | 0.008080  |
| 17            | 1             | 0           | -3.727767               | 1.817997  | 0.221959  |
| 18            | 1             | 0           | -6.073529               | 1.045996  | 0.234053  |
| 19            | 1             | 0           | -6.584854               | -1.367302 | 0.007627  |
| 20            | 1             | 0           | -4.735133               | -2.996222 | -0.231645 |
| 21            | 1             | 0           | -2.396542               | -2.219154 | -0.239996 |
| 22            | 1             | 0           | 5.099002                | -1.289850 | 0.014894  |
| 23            | 1             | 0           | 4.615348                | -3.731618 | 0.044078  |
| 24            | 1             | 0           | 2.261720                | -4.517248 | 0.053271  |
| 25            | 1             | 0           | 0.411461                | -2.869401 | 0.034302  |
| 26            | 6             | 0           | 0.350880                | 3.420018  | -0.025645 |
| 27            | 6             | 0           | 1.679377                | 3.794648  | -0.030930 |
| 28            | 6             | 0           | 2.706819                | 2.847511  | -0.024560 |
| 29            | 6             | 0           | 0.008404                | 2.062078  | -0.014358 |
| 30            | 6             | 0           | 1.045618                | 1.117903  | -0.008234 |
| 31            | 6             | 0           | 2.383460                | 1.508334  | -0.013230 |
| 32            | 8             | 0           | 3.385030                | 0.581324  | -0.007965 |
| 33            | 1             | 0           | 3.748012                | 3.141043  | -0.029068 |
| 34            | 1             | 0           | 1.938486                | 4.845586  | -0.040220 |
| 35            | 1             | 0           | -0.444924               | 4.153195  | -0.031321 |

**4 (Neutral, Gas Phase):**

| Center Number | Atomic Number | Atomic Type | Coordinates (Angstroms) |           |           |
|---------------|---------------|-------------|-------------------------|-----------|-----------|
|               |               |             | X                       | Y         | Z         |
| 1             | 7             | 0           | -0.699825               | -0.220344 | 0.000362  |
| 2             | 7             | 0           | 0.574222                | -0.631335 | 0.000390  |
| 3             | 7             | 0           | 1.300021                | 1.639634  | -0.000520 |
| 4             | 6             | 0           | 1.500779                | 0.331099  | -0.000033 |
| 5             | 6             | 0           | 2.906965                | -0.154276 | 0.000021  |
| 6             | 6             | 0           | 3.951182                | 0.767085  | 0.000343  |
| 7             | 6             | 0           | 3.198308                | -1.517593 | -0.000246 |
| 8             | 6             | 0           | 4.514602                | -1.950039 | -0.000168 |
| 9             | 6             | 0           | 5.266847                | 0.331072  | 0.000429  |
| 10            | 6             | 0           | 5.552459                | -1.027523 | 0.000174  |
| 11            | 6             | 0           | -1.721678               | -1.178902 | 0.000160  |
| 12            | 6             | 0           | -1.449236               | -2.542297 | -0.000378 |
| 13            | 6             | 0           | -2.491880               | -3.453375 | -0.000632 |
| 14            | 6             | 0           | -3.807989               | -3.011517 | -0.000398 |
| 15            | 6             | 0           | -4.084977               | -1.652401 | 0.000122  |
| 16            | 6             | 0           | -3.048820               | -0.738210 | 0.000437  |
| 17            | 1             | 0           | 3.714289                | 1.821727  | 0.000520  |
| 18            | 1             | 0           | 6.072447                | 1.053939  | 0.000715  |
| 19            | 1             | 0           | 6.580334                | -1.367354 | 0.000233  |
| 20            | 1             | 0           | 4.731303                | -3.010556 | -0.000373 |
| 21            | 1             | 0           | 2.386605                | -2.231395 | -0.000530 |
| 22            | 1             | 0           | -5.098970               | -1.276039 | 0.000334  |
| 23            | 1             | 0           | -4.623387               | -3.721892 | -0.000634 |
| 24            | 1             | 0           | -2.273301               | -4.512380 | -0.001023 |
| 25            | 1             | 0           | -0.417406               | -2.859991 | -0.000569 |
| 26            | 6             | 0           | -0.339551               | 3.417075  | -0.000741 |
| 27            | 6             | 0           | -1.665056               | 3.796384  | -0.000555 |
| 28            | 6             | 0           | -2.696050               | 2.852641  | 0.000003  |
| 29            | 6             | 0           | -0.000709               | 2.057138  | -0.000388 |
| 30            | 6             | 0           | -1.042363               | 1.118092  | 0.000136  |
| 31            | 6             | 0           | -2.378671               | 1.512729  | 0.000386  |
| 32            | 8             | 0           | -3.385478               | 0.588740  | 0.001186  |
| 33            | 1             | 0           | -3.736533               | 3.146003  | 0.000183  |
| 34            | 1             | 0           | -1.920328               | 4.847858  | -0.000837 |
| 35            | 1             | 0           | 0.462860                | 4.141382  | -0.001166 |

**4 (Cation, Gas Phase):**

| Center Number | Atomic Number | Atomic Type | Coordinates (Angstroms) |           |           |
|---------------|---------------|-------------|-------------------------|-----------|-----------|
|               |               |             | X                       | Y         | Z         |
| 1             | 7             | 0           | -0.682002               | -0.196127 | 0.000022  |
| 2             | 7             | 0           | 0.537496                | -0.593907 | 0.000006  |
| 3             | 7             | 0           | 1.275722                | 1.653636  | -0.000186 |
| 4             | 6             | 0           | 1.515819                | 0.359736  | -0.000084 |
| 5             | 6             | 0           | 2.896205                | -0.138262 | -0.000032 |
| 6             | 6             | 0           | 3.948726                | 0.779109  | 0.000119  |
| 7             | 6             | 0           | 3.166369                | -1.508829 | -0.000116 |
| 8             | 6             | 0           | 4.476746                | -1.952811 | -0.000031 |
| 9             | 6             | 0           | 5.255601                | 0.327035  | 0.000201  |
| 10            | 6             | 0           | 5.521069                | -1.037224 | 0.000112  |
| 11            | 6             | 0           | -1.712187               | -1.182029 | 0.000018  |
| 12            | 6             | 0           | -1.404255               | -2.540682 | -0.000118 |
| 13            | 6             | 0           | -2.431001               | -3.457535 | -0.000143 |
| 14            | 6             | 0           | -3.758864               | -3.023886 | -0.000040 |
| 15            | 6             | 0           | -4.066264               | -1.678025 | 0.000097  |
| 16            | 6             | 0           | -3.037792               | -0.748578 | 0.000124  |
| 17            | 1             | 0           | 3.732960                | 1.838207  | 0.000179  |
| 18            | 1             | 0           | 6.070645                | 1.037949  | 0.000343  |
| 19            | 1             | 0           | 6.544869                | -1.387817 | 0.000190  |
| 20            | 1             | 0           | 4.685010                | -3.014122 | -0.000080 |
| 21            | 1             | 0           | 2.354519                | -2.222059 | -0.000260 |
| 22            | 1             | 0           | -5.086727               | -1.320364 | 0.000182  |
| 23            | 1             | 0           | -4.561449               | -3.749305 | -0.000074 |
| 24            | 1             | 0           | -2.205572               | -4.514448 | -0.000247 |
| 25            | 1             | 0           | -0.369599               | -2.849126 | -0.000199 |
| 26            | 6             | 0           | -0.344520               | 3.432122  | -0.000183 |
| 27            | 6             | 0           | -1.669830               | 3.782029  | -0.000096 |
| 28            | 6             | 0           | -2.708035               | 2.827355  | 0.000044  |
| 29            | 6             | 0           | 0.001492                | 2.069945  | -0.000130 |
| 30            | 6             | 0           | -1.045140               | 1.109984  | 0.000009  |
| 31            | 6             | 0           | -2.402840               | 1.495548  | 0.000098  |
| 32            | 8             | 0           | -3.381499               | 0.565083  | 0.000286  |
| 33            | 1             | 0           | -3.746051               | 3.130267  | 0.000119  |
| 34            | 1             | 0           | -1.941873               | 4.829478  | -0.000135 |
| 35            | 1             | 0           | 0.448958                | 4.165461  | -0.000297 |

**4 (Anion, Gas Phase):**

| Center Number | Atomic Number | Atomic Type | Coordinates (Angstroms) |           |           |
|---------------|---------------|-------------|-------------------------|-----------|-----------|
|               |               |             | X                       | Y         | Z         |
| 1             | 7             | 0           | -0.721664               | -0.241309 | 0.269074  |
| 2             | 7             | 0           | 0.610932                | -0.659774 | 0.164880  |
| 3             | 7             | 0           | 1.308804                | 1.639577  | 0.039430  |
| 4             | 6             | 0           | 1.483807                | 0.310595  | 0.086340  |
| 5             | 6             | 0           | 2.905724                | -0.158587 | 0.031733  |
| 6             | 6             | 0           | 3.934282                | 0.769948  | -0.104311 |
| 7             | 6             | 0           | 3.229660                | -1.512632 | 0.114813  |
| 8             | 6             | 0           | 4.551475                | -1.926507 | 0.058836  |
| 9             | 6             | 0           | 5.258567                | 0.355159  | -0.159431 |
| 10            | 6             | 0           | 5.573980                | -0.994043 | -0.079271 |
| 11            | 6             | 0           | -1.706117               | -1.173059 | 0.099101  |
| 12            | 6             | 0           | -1.453571               | -2.540837 | -0.037011 |
| 13            | 6             | 0           | -2.503003               | -3.442731 | -0.185267 |
| 14            | 6             | 0           | -3.815485               | -3.009162 | -0.221441 |
| 15            | 6             | 0           | -4.078092               | -1.640268 | -0.104802 |
| 16            | 6             | 0           | -3.050918               | -0.742500 | 0.060895  |
| 17            | 1             | 0           | 3.662319                | 1.814953  | -0.164439 |
| 18            | 1             | 0           | 6.047931                | 1.089971  | -0.266642 |
| 19            | 1             | 0           | 6.606788                | -1.319181 | -0.122428 |
| 20            | 1             | 0           | 4.786974                | -2.982355 | 0.123723  |
| 21            | 1             | 0           | 2.425214                | -2.226884 | 0.226812  |
| 22            | 1             | 0           | -5.088684               | -1.252148 | -0.130295 |
| 23            | 1             | 0           | -4.631209               | -3.709807 | -0.339524 |
| 24            | 1             | 0           | -2.278503               | -4.498569 | -0.278423 |
| 25            | 1             | 0           | -0.424647               | -2.866598 | -0.018303 |
| 26            | 6             | 0           | -0.358927               | 3.392882  | -0.130304 |
| 27            | 6             | 0           | -1.693959               | 3.784968  | -0.159685 |
| 28            | 6             | 0           | -2.714733               | 2.852683  | -0.062984 |
| 29            | 6             | 0           | -0.001990               | 2.047263  | 0.005319  |
| 30            | 6             | 0           | -1.050918               | 1.117161  | 0.106355  |
| 31            | 6             | 0           | -2.368048               | 1.511795  | 0.075845  |
| 32            | 8             | 0           | -3.385466               | 0.585669  | 0.229000  |
| 33            | 1             | 0           | -3.760088               | 3.129592  | -0.074883 |
| 34            | 1             | 0           | -1.940092               | 4.835101  | -0.261921 |
| 35            | 1             | 0           | 0.440826                | 4.118345  | -0.207737 |

**5 (Neutral, in DCM):**

| Center Number | Atomic Number | Atomic Type | Coordinates (Angstroms) |   |   |
|---------------|---------------|-------------|-------------------------|---|---|
|               |               |             | X                       | Y | Z |

**5 (Neutral, in Gas Phase):**

| Center Number | Atomic Number | Atomic Type | Coordinates (Angstroms) |   |   |
|---------------|---------------|-------------|-------------------------|---|---|
|               |               |             | X                       | Y | Z |

| Number | Number | Type | X         | Y         | Z         |
|--------|--------|------|-----------|-----------|-----------|
| 1      | 7      | 0    | -0.573597 | -0.197744 | 0.051863  |
| 2      | 7      | 0    | 0.717466  | -0.568206 | 0.094131  |
| 3      | 7      | 0    | 1.420139  | 1.674892  | -0.202691 |
| 4      | 6      | 0    | 1.636432  | 0.382894  | -0.024006 |
| 5      | 6      | 0    | 3.047649  | -0.090848 | 0.041442  |
| 6      | 6      | 0    | 4.090302  | 0.820377  | -0.116892 |
| 7      | 6      | 0    | 3.345243  | -1.436654 | 0.256731  |
| 8      | 6      | 0    | 4.664258  | -1.861432 | 0.308859  |
| 9      | 6      | 0    | 5.408814  | 0.392243  | -0.065507 |
| 10     | 6      | 0    | 5.700026  | -0.949167 | 0.146504  |
| 11     | 6      | 0    | -1.504024 | -1.259956 | -0.054041 |
| 12     | 6      | 0    | -1.042390 | -2.546983 | -0.335691 |
| 13     | 6      | 0    | -1.928635 | -3.604737 | -0.430718 |
| 14     | 6      | 0    | -3.290952 | -3.395770 | -0.259692 |
| 15     | 6      | 0    | -3.757030 | -2.118560 | -0.002344 |
| 16     | 6      | 0    | -2.875493 | -1.047686 | 0.106879  |
| 17     | 1      | 0    | 3.860083  | 1.863760  | -0.282850 |
| 18     | 1      | 0    | 6.120119  | 1.109313  | -0.192020 |
| 19     | 1      | 0    | 6.729469  | -1.283151 | 0.185820  |
| 20     | 1      | 0    | 4.884107  | -2.908235 | 0.477457  |
| 21     | 1      | 0    | 2.540971  | -2.148262 | 0.385859  |
| 22     | 1      | 0    | -4.818428 | -1.938839 | 0.121055  |
| 23     | 1      | 0    | -3.990106 | -4.218117 | -0.335013 |
| 24     | 1      | 0    | -1.549740 | -4.595082 | -0.646571 |
| 25     | 1      | 0    | 0.014894  | -2.705108 | -0.480575 |
| 26     | 6      | 0    | -0.198071 | 3.436771  | -0.288702 |
| 27     | 6      | 0    | -1.506565 | 3.858422  | -0.220249 |
| 28     | 6      | 0    | -2.536304 | 2.939913  | -0.020503 |
| 29     | 6      | 0    | 0.114495  | 2.075204  | -0.174204 |
| 30     | 6      | 0    | -0.933581 | 1.144216  | -0.004688 |
| 31     | 6      | 0    | -2.254986 | 1.589738  | 0.104051  |
| 32     | 16     | 0    | -3.576003 | 0.510590  | 0.502793  |
| 33     | 1      | 0    | -3.562315 | 3.278850  | 0.050463  |
| 34     | 1      | 0    | -1.744208 | 4.910345  | -0.312390 |
| 35     | 1      | 0    | 0.617938  | 4.134579  | -0.422424 |

| Number | Number | Type | X         | Y         | Z         |
|--------|--------|------|-----------|-----------|-----------|
| 1      | 7      | 0    | -0.572716 | -0.202668 | 0.085255  |
| 2      | 7      | 0    | 0.717665  | -0.576235 | 0.122211  |
| 3      | 7      | 0    | 1.418136  | 1.663373  | -0.226771 |
| 4      | 6      | 0    | 1.635675  | 0.375209  | -0.020951 |
| 5      | 6      | 0    | 3.045220  | -0.093991 | 0.044996  |
| 6      | 6      | 0    | 4.077737  | 0.783075  | -0.276835 |
| 7      | 6      | 0    | 3.349334  | -1.398194 | 0.430422  |
| 8      | 6      | 0    | 4.668646  | -1.817456 | 0.491728  |
| 9      | 6      | 0    | 5.396123  | 0.358392  | -0.220180 |
| 10     | 6      | 0    | 5.695238  | -0.941296 | 0.164674  |
| 11     | 6      | 0    | -1.505376 | -1.257461 | -0.057865 |
| 12     | 6      | 0    | -1.047961 | -2.532891 | -0.388939 |
| 13     | 6      | 0    | -1.939300 | -3.580672 | -0.531299 |
| 14     | 6      | 0    | -3.300674 | -3.370624 | -0.361641 |
| 15     | 6      | 0    | -3.761110 | -2.102736 | -0.052943 |
| 16     | 6      | 0    | -2.875567 | -1.043190 | 0.109403  |
| 17     | 1      | 0    | 3.830420  | 1.794198  | -0.568791 |
| 18     | 1      | 0    | 6.193112  | 1.044863  | -0.475211 |
| 19     | 1      | 0    | 6.725362  | -1.270928 | 0.211375  |
| 20     | 1      | 0    | 4.896897  | -2.830748 | 0.796397  |
| 21     | 1      | 0    | 2.545298  | -2.073842 | 0.687556  |
| 22     | 1      | 0    | -4.821239 | -1.919083 | 0.070030  |
| 23     | 1      | 0    | -4.003304 | -4.184604 | -0.477548 |
| 24     | 1      | 0    | -1.565460 | -4.563373 | -0.785139 |
| 25     | 1      | 0    | 0.011156  | -2.681894 | -0.529272 |
| 26     | 6      | 0    | -0.200388 | 3.424050  | -0.316864 |
| 27     | 6      | 0    | -1.506892 | 3.845744  | -0.234362 |
| 28     | 6      | 0    | -2.534131 | 2.930894  | -0.003313 |
| 29     | 6      | 0    | 0.115818  | 2.063947  | -0.185571 |
| 30     | 6      | 0    | -0.931194 | 1.139522  | 0.016272  |
| 31     | 6      | 0    | -2.250884 | 1.583900  | 0.140216  |
| 32     | 16     | 0    | -3.552955 | 0.501263  | 0.591383  |
| 33     | 1      | 0    | -3.559725 | 3.267005  | 0.076925  |
| 34     | 1      | 0    | -1.745698 | 4.895628  | -0.340741 |
| 35     | 1      | 0    | 0.616971  | 4.113953  | -0.474266 |

**5 (Cation, in Gas Phase):**

| Center Number | Atomic Number | Atomic Type | Coordinates (Angstroms) |           |           |
|---------------|---------------|-------------|-------------------------|-----------|-----------|
|               |               |             | X                       | Y         | Z         |
| 1             | 7             | 0           | -0.553191               | -0.173141 | -0.009073 |
| 2             | 7             | 0           | 0.684184                | -0.536307 | -0.001091 |
| 3             | 7             | 0           | 1.406379                | 1.698592  | -0.066764 |
| 4             | 6             | 0           | 1.654873                | 0.408541  | -0.015397 |
| 5             | 6             | 0           | 3.039217                | -0.080373 | 0.016642  |
| 6             | 6             | 0           | 4.084952                | 0.833163  | -0.125237 |
| 7             | 6             | 0           | 3.318626                | -1.437011 | 0.192446  |
| 8             | 6             | 0           | 4.631738                | -1.872085 | 0.224333  |
| 9             | 6             | 0           | 5.394945                | 0.389819  | -0.096703 |
| 10            | 6             | 0           | 5.669925                | -0.960997 | 0.077564  |
| 11            | 6             | 0           | -1.496119               | -1.265604 | -0.048629 |
| 12            | 6             | 0           | -0.996648               | -2.563775 | -0.186311 |
| 13            | 6             | 0           | -1.861746               | -3.633085 | -0.211944 |
| 14            | 6             | 0           | -3.235556               | -3.423870 | -0.098215 |
| 15            | 6             | 0           | -3.731754               | -2.145315 | 0.025978  |
| 16            | 6             | 0           | -2.869178               | -1.046148 | 0.046893  |
| 17            | 1             | 0           | 3.862449                | 1.882364  | -0.259723 |
| 18            | 1             | 0           | 6.204046                | 1.098393  | -0.210648 |
| 19            | 1             | 0           | 6.695814                | -1.304635 | 0.100597  |
| 20            | 1             | 0           | 4.846983                | -2.922590 | 0.365434  |
| 21            | 1             | 0           | 2.512409                | -2.146431 | 0.314171  |
| 22            | 1             | 0           | -4.798365               | -1.975187 | 0.102801  |
| 23            | 1             | 0           | -3.918009               | -4.262925 | -0.115230 |
| 24            | 1             | 0           | -1.468261               | -4.633690 | -0.322621 |
| 25            | 1             | 0           | 0.066127                | -2.717488 | -0.276920 |
| 26            | 6             | 0           | -0.175796               | 3.467626  | -0.092841 |
| 27            | 6             | 0           | -1.481936               | 3.865291  | -0.064395 |
| 28            | 6             | 0           | -2.528637               | 2.929654  | 0.007338  |
| 29            | 6             | 0           | 0.129612                | 2.094395  | -0.056049 |
| 30            | 6             | 0           | -0.934345               | 1.136846  | -0.003027 |
| 31            | 6             | 0           | -2.282644               | 1.577457  | 0.044366  |
| 32            | 16            | 0           | -3.631782               | 0.503029  | 0.200631  |
| 33            | 1             | 0           | -3.553110               | 3.278512  | 0.038955  |
| 34            | 1             | 0           | -1.728266               | 4.918609  | -0.091910 |
| 35            | 1             | 0           | 0.647926                | 4.165421  | -0.137369 |

**5 (Anion, in Gas Phase):**

| Center Number | Atomic Number | Atomic Type | Coordinates (Angstroms) |           |           |
|---------------|---------------|-------------|-------------------------|-----------|-----------|
|               |               |             | X                       | Y         | Z         |
| 1             | 7             | 0           | -0.599456               | -0.227301 | 0.334132  |
| 2             | 7             | 0           | 0.761076                | -0.581189 | 0.386792  |
| 3             | 7             | 0           | 1.380624                | 1.615673  | -0.347170 |
| 4             | 6             | 0           | 1.601622                | 0.351753  | 0.029580  |
| 5             | 6             | 0           | 3.037627                | -0.076799 | 0.070445  |
| 6             | 6             | 0           | 4.036755                | 0.811445  | -0.317644 |
| 7             | 6             | 0           | 3.400255                | -1.356886 | 0.487639  |
| 8             | 6             | 0           | 4.732934                | -1.738326 | 0.516341  |
| 9             | 6             | 0           | 5.371401                | 0.428041  | -0.291793 |
| 10            | 6             | 0           | 5.726118                | -0.847203 | 0.125955  |
| 11            | 6             | 0           | -1.468332               | -1.247862 | 0.024140  |
| 12            | 6             | 0           | -1.008863               | -2.511087 | -0.379992 |
| 13            | 6             | 0           | -1.905316               | -3.517857 | -0.700029 |
| 14            | 6             | 0           | -3.275949               | -3.302155 | -0.654112 |
| 15            | 6             | 0           | -3.741482               | -2.053334 | -0.254938 |
| 16            | 6             | 0           | -2.861647               | -1.050326 | 0.113256  |
| 17            | 1             | 0           | 3.735229                | 1.800289  | -0.635191 |
| 18            | 1             | 0           | 6.138460                | 1.129418  | -0.598781 |
| 19            | 1             | 0           | 6.767548                | -1.146051 | 0.148059  |
| 20            | 1             | 0           | 4.999938                | -2.735860 | 0.844754  |
| 21            | 1             | 0           | 2.616436                | -2.037401 | 0.792158  |
| 22            | 1             | 0           | -4.805544               | -1.855552 | -0.196761 |
| 23            | 1             | 0           | -3.972898               | -4.087288 | -0.916004 |
| 24            | 1             | 0           | -1.520584               | -4.484012 | -1.005054 |
| 25            | 1             | 0           | 0.057195                | -2.670406 | -0.431079 |
| 26            | 6             | 0           | -0.292805               | 3.340213  | -0.524077 |
| 27            | 6             | 0           | -1.613567               | 3.765600  | -0.424223 |
| 28            | 6             | 0           | -2.608713               | 2.885355  | -0.043348 |
| 29            | 6             | 0           | 0.073266                | 2.016542  | -0.026880 |
| 30            | 6             | 0           | -0.955571               | 1.124551  | 0.122555  |
| 31            | 6             | 0           | -2.258078               | 1.562418  | 0.250616  |
| 32            | 16            | 0           | -3.483702               | 0.432419  | 0.842017  |
| 33            | 1             | 0           | -3.642098               | 3.195764  | 0.037670  |
| 34            | 1             | 0           | -1.863801               | 4.796368  | -0.646922 |
| 35            | 1             | 0           | 0.495705                | 4.021250  | -0.818346 |

**6 (Neutral, in DCM):**

| Center Number | Atomic Number | Atomic Type | Coordinates (Angstroms) |           |           |
|---------------|---------------|-------------|-------------------------|-----------|-----------|
|               |               |             | X                       | Y         | Z         |
| 1             | 7             | 0           | -0.217141               | 0.754509  | -0.050943 |
| 2             | 7             | 0           | -1.554045               | 0.620161  | -0.001393 |
| 3             | 7             | 0           | -1.343578               | -1.733832 | -0.183509 |
| 4             | 6             | 0           | -2.043022               | -0.611377 | -0.074651 |
| 5             | 6             | 0           | -3.527656               | -0.710501 | -0.032275 |
| 6             | 6             | 0           | -4.137807               | -1.963243 | -0.008093 |
| 7             | 6             | 0           | -4.322396               | 0.436572  | -0.016328 |
| 8             | 6             | 0           | -5.703799               | 0.328656  | 0.024320  |
| 9             | 6             | 0           | -5.520475               | -2.067597 | 0.033405  |

**6 (Neutral, Gas Phase):**

| Center Number | Atomic Number | Atomic Type | Coordinates (Angstroms) |           |           |
|---------------|---------------|-------------|-------------------------|-----------|-----------|
|               |               |             | X                       | Y         | Z         |
| 1             | 7             | 0           | -0.218557               | 0.761680  | -0.060564 |
| 2             | 7             | 0           | -1.556257               | 0.629579  | 0.004692  |
| 3             | 7             | 0           | -1.347465               | -1.722773 | -0.227406 |
| 4             | 6             | 0           | -2.045166               | -0.602692 | -0.086195 |
| 5             | 6             | 0           | -3.526543               | -0.705354 | -0.031823 |
| 6             | 6             | 0           | -4.127608               | -1.961057 | 0.001160  |
| 7             | 6             | 0           | -4.324221               | 0.437918  | -0.012331 |
| 8             | 6             | 0           | -5.703700               | 0.322967  | 0.041380  |
| 9             | 6             | 0           | -5.508161               | -2.071625 | 0.056415  |

|    |   |   |           |           |           |
|----|---|---|-----------|-----------|-----------|
| 10 | 6 | 0 | -6.307327 | -0.922954 | 0.049369  |
| 11 | 6 | 0 | 0.242508  | 2.107412  | -0.048306 |
| 12 | 6 | 0 | -0.257845 | 2.980009  | 0.909425  |
| 13 | 6 | 0 | 0.156775  | 4.302903  | 0.901571  |
| 14 | 6 | 0 | 1.060939  | 4.747350  | -0.055307 |
| 15 | 6 | 0 | 1.547241  | 3.866697  | -1.013411 |
| 16 | 6 | 0 | 1.136927  | 2.541435  | -1.017726 |
| 17 | 1 | 0 | -3.522358 | -2.852287 | -0.019576 |
| 18 | 1 | 0 | -5.984238 | -3.045878 | 0.054221  |
| 19 | 1 | 0 | -7.386673 | -1.005456 | 0.080980  |
| 20 | 1 | 0 | -6.311329 | 1.224928  | 0.034050  |
| 21 | 1 | 0 | -3.853993 | 1.411130  | -0.040108 |
| 22 | 1 | 0 | 1.495452  | 1.852156  | -1.771927 |
| 23 | 1 | 0 | 2.240445  | 4.212996  | -1.769188 |
| 24 | 1 | 0 | 1.382347  | 5.781052  | -0.057908 |
| 25 | 1 | 0 | -0.226687 | 4.987550  | 1.647167  |
| 26 | 1 | 0 | -0.963153 | 2.616343  | 1.645217  |
| 27 | 6 | 0 | 0.824314  | -2.751899 | -0.170131 |
| 28 | 6 | 0 | 2.191426  | -2.646162 | -0.082357 |
| 29 | 6 | 0 | 2.778446  | -1.383100 | 0.049084  |
| 30 | 6 | 0 | 0.012555  | -1.606012 | -0.142335 |
| 31 | 6 | 0 | 0.630715  | -0.339157 | -0.050035 |
| 32 | 6 | 0 | 2.018107  | -0.232390 | 0.069945  |
| 33 | 1 | 0 | 2.488342  | 0.732150  | 0.190253  |
| 34 | 6 | 0 | 4.271511  | -1.303629 | 0.156900  |
| 35 | 1 | 0 | 2.813469  | -3.532442 | -0.101810 |
| 36 | 1 | 0 | 0.338349  | -3.715281 | -0.253150 |
| 37 | 9 | 0 | 4.710374  | -0.062565 | 0.388834  |
| 38 | 9 | 0 | 4.876589  | -1.725476 | -0.966825 |
| 39 | 9 | 0 | 4.744876  | -2.077616 | 1.146249  |

|    |   |   |           |           |           |
|----|---|---|-----------|-----------|-----------|
| 10 | 6 | 0 | -6.299396 | -0.931136 | 0.076892  |
| 11 | 6 | 0 | 0.244136  | 2.110132  | -0.057064 |
| 12 | 6 | 0 | -0.301766 | 3.004147  | 0.854814  |
| 13 | 6 | 0 | 0.123112  | 4.322782  | 0.850674  |
| 14 | 6 | 0 | 1.082493  | 4.747972  | -0.058476 |
| 15 | 6 | 0 | 1.610719  | 3.850377  | -0.976348 |
| 16 | 6 | 0 | 1.190090  | 2.529499  | -0.983961 |
| 17 | 1 | 0 | -3.499671 | -2.840811 | -0.016452 |
| 18 | 1 | 0 | -5.967779 | -3.051145 | 0.084768  |
| 19 | 1 | 0 | -7.377594 | -1.018948 | 0.119067  |
| 20 | 1 | 0 | -6.316713 | 1.214979  | 0.052804  |
| 21 | 1 | 0 | -3.854018 | 1.410969  | -0.045483 |
| 22 | 1 | 0 | 1.579832  | 1.830180  | -1.712311 |
| 23 | 1 | 0 | 2.344803  | 4.180500  | -1.699424 |
| 24 | 1 | 0 | 1.412946  | 5.778185  | -0.056848 |
| 25 | 1 | 0 | -0.295562 | 5.020498  | 1.563956  |
| 26 | 1 | 0 | -1.054329 | 2.654967  | 1.548224  |
| 27 | 6 | 0 | 0.816628  | -2.743743 | -0.222466 |
| 28 | 6 | 0 | 2.182140  | -2.644360 | -0.115963 |
| 29 | 6 | 0 | 2.773658  | -1.388532 | 0.052611  |
| 30 | 6 | 0 | 0.005923  | -1.596886 | -0.180506 |
| 31 | 6 | 0 | 0.628761  | -0.334574 | -0.061334 |
| 32 | 6 | 0 | 2.014524  | -0.237668 | 0.086228  |
| 33 | 1 | 0 | 2.489484  | 0.719518  | 0.239278  |
| 34 | 6 | 0 | 4.267157  | -1.315039 | 0.180467  |
| 35 | 1 | 0 | 2.803391  | -3.530206 | -0.144255 |
| 36 | 1 | 0 | 0.322387  | -3.699763 | -0.328392 |
| 37 | 9 | 0 | 4.695515  | -0.083418 | 0.473087  |
| 38 | 9 | 0 | 4.876287  | -1.683965 | -0.956335 |
| 39 | 9 | 0 | 4.722874  | -2.133406 | 1.138023  |

### 6 (Cation, Gas Phase):

| Center Number | Atomic Number | Atomic Type | Coordinates (Angstroms) |           |           |
|---------------|---------------|-------------|-------------------------|-----------|-----------|
|               |               |             | X                       | Y         | Z         |
| 1             | 7             | 0           | -0.231210               | 0.730828  | -0.055193 |
| 2             | 7             | 0           | -1.513475               | 0.621984  | -0.050538 |
| 3             | 7             | 0           | -1.332344               | -1.721755 | -0.178880 |
| 4             | 6             | 0           | -2.059378               | -0.618435 | -0.082878 |
| 5             | 6             | 0           | -3.521104               | -0.693507 | -0.032672 |
| 6             | 6             | 0           | -4.137717               | -1.945923 | 0.006283  |
| 7             | 6             | 0           | -4.296264               | 0.469512  | -0.019126 |
| 8             | 6             | 0           | -5.675146               | 0.374027  | 0.033145  |
| 9             | 6             | 0           | -5.516773               | -2.031089 | 0.060836  |
| 10            | 6             | 0           | -6.285678               | -0.873263 | 0.074097  |
| 11            | 6             | 0           | 0.258281                | 2.098169  | -0.051718 |
| 12            | 6             | 0           | -0.215843               | 2.952405  | 0.929863  |
| 13            | 6             | 0           | 0.227729                | 4.264721  | 0.925855  |
| 14            | 6             | 0           | 1.108112                | 4.700354  | -0.056185 |
| 15            | 6             | 0           | 1.552884                | 3.829124  | -1.042798 |
| 16            | 6             | 0           | 1.130809                | 2.509233  | -1.047341 |
| 17            | 1             | 0           | -3.532652               | -2.841584 | -0.004586 |
| 18            | 1             | 0           | -5.995017               | -3.000600 | 0.094297  |
| 19            | 1             | 0           | -7.364805               | -0.943684 | 0.116009  |
| 20            | 1             | 0           | -6.276313               | 1.273067  | 0.039806  |
| 21            | 1             | 0           | -3.820517               | 1.439489  | -0.057172 |
| 22            | 1             | 0           | 1.452907                | 1.823677  | -1.821010 |
| 23            | 1             | 0           | 2.223124                | 4.177439  | -1.816659 |
| 24            | 1             | 0           | 1.445863                | 5.728060  | -0.057021 |
| 25            | 1             | 0           | -0.118195               | 4.947460  | 1.689766  |
| 26            | 1             | 0           | -0.909232               | 2.591527  | 1.677792  |
| 27            | 6             | 0           | 0.811219                | -2.769215 | -0.215928 |
| 28            | 6             | 0           | 2.158618                | -2.641089 | -0.127309 |
| 29            | 6             | 0           | 2.755480                | -1.357209 | 0.036026  |
| 30            | 6             | 0           | -0.008693               | -1.608422 | -0.157057 |
| 31            | 6             | 0           | 0.615748                | -0.332755 | -0.053143 |
| 32            | 6             | 0           | 2.020405                | -0.215400 | 0.075010  |
| 33            | 1             | 0           | 2.491497                | 0.745300  | 0.219077  |
| 34            | 6             | 0           | 4.260639                | -1.301641 | 0.174675  |
| 35            | 1             | 0           | 2.798577                | -3.514148 | -0.159606 |
| 36            | 1             | 0           | 0.322260                | -3.728441 | -0.314828 |
| 37            | 9             | 0           | 4.694263                | -0.056279 | 0.344206  |
| 38            | 9             | 0           | 4.840224                | -1.801082 | -0.915524 |
| 39            | 9             | 0           | 4.656818                | -2.028478 | 1.216719  |

### 6 (Anion, Gas Phase):

| Center Number | Atomic Number | Atomic Type | Coordinates (Angstroms) |           |           |
|---------------|---------------|-------------|-------------------------|-----------|-----------|
|               |               |             | X                       | Y         | Z         |
| 1             | 7             | 0           | -0.181858               | 0.834252  | -0.014883 |
| 2             | 7             | 0           | -1.534523               | 0.603296  | 0.301394  |
| 3             | 7             | 0           | -1.313876               | -1.526578 | -0.762227 |
| 4             | 6             | 0           | -1.988148               | -0.522694 | -0.168795 |
| 5             | 6             | 0           | -3.457236               | -0.738011 | 0.021263  |
| 6             | 6             | 0           | -4.047650               | -1.919092 | -0.419552 |
| 7             | 6             | 0           | -4.258540               | 0.229515  | 0.626502  |
| 8             | 6             | 0           | -5.617524               | 0.015095  | 0.794398  |
| 9             | 6             | 0           | -5.410777               | -2.130198 | -0.258353 |
| 10            | 6             | 0           | -6.201382               | -1.166645 | 0.351626  |
| 11            | 6             | 0           | 0.212928                | 2.148444  | -0.100587 |
| 12            | 6             | 0           | -0.639178               | 3.174417  | 0.350788  |
| 13            | 6             | 0           | -0.266160               | 4.502202  | 0.236850  |
| 14            | 6             | 0           | 0.947350                | 4.870136  | -0.330257 |
| 15            | 6             | 0           | 1.783006                | 3.861860  | -0.798246 |
| 16            | 6             | 0           | 1.435205                | 2.528344  | -0.689806 |
| 17            | 1             | 0           | -3.410582               | -2.658101 | -0.885905 |
| 18            | 1             | 0           | -5.856144               | -3.053756 | -0.609107 |
| 19            | 1             | 0           | -7.264153               | -1.332713 | 0.481464  |
| 20            | 1             | 0           | -6.226473               | 0.774334  | 1.270636  |
| 21            | 1             | 0           | -3.793450               | 1.146609  | 0.962161  |
| 22            | 1             | 0           | 2.096134                | 1.775138  | -1.092589 |
| 23            | 1             | 0           | 2.726378                | 4.114794  | -1.268253 |
| 24            | 1             | 0           | 1.231026                | 5.910847  | -0.414398 |
| 25            | 1             | 0           | -0.944417               | 5.265283  | 0.601883  |
| 26            | 1             | 0           | -1.589174               | 2.899862  | 0.781148  |
| 27            | 6             | 0           | 0.849999                | -2.580091 | -0.826973 |
| 28            | 6             | 0           | 2.203843                | -2.564121 | -0.525645 |
| 29            | 6             | 0           | 2.768681                | -1.442471 | 0.056932  |
| 30            | 6             | 0           | 0.031188                | -1.468508 | -0.583830 |
| 31            | 6             | 0           | 0.659214                | -0.289956 | -0.090099 |
| 32            | 6             | 0           | 1.982048                | -0.305396 | 0.292933  |
| 33            | 1             | 0           | 2.428081                | 0.573081  | 0.741180  |
| 34            | 6             | 0           | 4.208772                | -1.390417 | 0.412878  |
| 35            | 1             | 0           | 2.816607                | -3.431767 | -0.732296 |
| 36            | 1             | 0           | 0.382756                | -3.462003 | -1.245534 |
| 37            | 9             | 0           | 4.888621                | -0.438306 | -0.266996 |
| 38            | 9             | 0           | 4.852958                | -2.546245 | 0.176434  |
| 39            | 9             | 0           | 4.418456                | -1.101326 | 1.715836  |

### 7 (Neutral, in DCM):

| Center Number | Atomic Number | Atomic Type | Coordinates (Angstroms) |           |           |
|---------------|---------------|-------------|-------------------------|-----------|-----------|
|               |               |             | X                       | Y         | Z         |
| 1             | 7             | 0           | -0.893569               | -0.869853 | -0.011320 |
| 2             | 7             | 0           | -1.253692               | 0.412275  | -0.163380 |
| 3             | 7             | 0           | -3.525327               | -0.143331 | 0.283735  |
| 4             | 6             | 0           | -2.543118               | 0.700783  | 0.010073  |
| 5             | 6             | 0           | -2.878787               | 2.145987  | -0.128849 |
| 6             | 6             | 0           | -4.178477               | 2.581777  | 0.123013  |
| 7             | 6             | 0           | -1.911586               | 3.074917  | -0.514176 |
| 8             | 6             | 0           | -2.242279               | 4.415503  | -0.644496 |
| 9             | 6             | 0           | -4.504750               | 3.924072  | -0.003165 |
| 10            | 6             | 0           | -3.538727               | 4.844719  | -0.388121 |
| 11            | 6             | 0           | 0.464285                | -1.242300 | -0.054281 |
| 12            | 6             | 0           | 1.551856                | -0.332418 | 0.119987  |

### 7 (Neutral, Gas Phase):

| Center Number | Atomic Number | Atomic Type | Coordinates (Angstroms) |           |           |
|---------------|---------------|-------------|-------------------------|-----------|-----------|
|               |               |             | X                       | Y         | Z         |
| 1             | 7             | 0           | -0.892887               | -0.867625 | -0.017070 |
| 2             | 7             | 0           | -1.254802               | 0.414393  | -0.161144 |
| 3             | 7             | 0           | -3.532350               | -0.148472 | 0.258886  |
| 4             | 6             | 0           | -2.549373               | 0.697699  | -0.001651 |
| 5             | 6             | 0           | -2.886047               | 2.140441  | -0.130550 |
| 6             | 6             | 0           | -4.176812               | 2.572769  | 0.163214  |
| 7             | 6             | 0           | -1.930203               | 3.067677  | -0.543020 |
| 8             | 6             | 0           | -2.264487               | 4.407688  | -0.658870 |
| 9             | 6             | 0           | -4.505403               | 3.914615  | 0.051492  |
| 10            | 6             | 0           | -3.551338               | 4.835376  | -0.359684 |
| 11            | 6             | 0           | 0.466766                | -1.237330 | -0.052847 |
| 12            | 6             | 0           | 1.553934                | -0.325024 | 0.115133  |

|    |   |   |           |           |           |
|----|---|---|-----------|-----------|-----------|
| 13 | 6 | 0 | 2.870551  | -0.797578 | -0.120690 |
| 14 | 6 | 0 | 3.078662  | -2.156482 | -0.419965 |
| 15 | 6 | 0 | 2.035952  | -3.041135 | -0.459131 |
| 16 | 6 | 0 | 0.734047  | -2.587810 | -0.272276 |
| 17 | 1 | 0 | -4.929709 | 1.862251  | 0.418695  |
| 18 | 1 | 0 | -5.517329 | 4.250762  | 0.198532  |
| 19 | 1 | 0 | -3.794458 | 5.892246  | -0.488855 |
| 20 | 1 | 0 | -1.484716 | 5.126756  | -0.949295 |
| 21 | 1 | 0 | -0.902206 | 2.742865  | -0.718764 |
| 22 | 1 | 0 | 2.190563  | -4.095385 | -0.647101 |
| 23 | 1 | 0 | 4.075621  | -2.535245 | -0.586628 |
| 24 | 6 | 0 | 3.993072  | 0.123026  | -0.018438 |
| 25 | 6 | 0 | 1.382013  | 1.008994  | 0.611580  |
| 26 | 6 | 0 | -4.163452 | -2.472771 | 0.399548  |
| 27 | 6 | 0 | -3.801267 | -3.801447 | 0.310215  |
| 28 | 6 | 0 | -2.477434 | -4.182329 | 0.077093  |
| 29 | 6 | 0 | -3.193074 | -1.470621 | 0.266647  |
| 30 | 6 | 0 | -1.859638 | -1.861682 | 0.077312  |
| 31 | 6 | 0 | -1.516951 | -3.202693 | -0.046627 |
| 32 | 8 | 0 | -0.231285 | -3.553604 | -0.328483 |
| 33 | 1 | 0 | -2.192681 | -5.221335 | -0.019275 |
| 34 | 1 | 0 | -4.556976 | -4.570021 | 0.409375  |
| 35 | 1 | 0 | -5.192334 | -2.175042 | 0.552545  |
| 36 | 6 | 0 | 3.764874  | 1.442584  | 0.422397  |
| 37 | 6 | 0 | 2.436542  | 1.838412  | 0.767147  |
| 38 | 6 | 0 | 5.314981  | -0.243555 | -0.347352 |
| 39 | 6 | 0 | 6.349307  | 0.655036  | -0.236825 |
| 40 | 6 | 0 | 6.114880  | 1.963531  | 0.212011  |
| 41 | 6 | 0 | 4.838411  | 2.347555  | 0.535773  |
| 42 | 1 | 0 | 0.400376  | 1.349532  | 0.889881  |
| 43 | 1 | 0 | 2.284625  | 2.835417  | 1.164419  |
| 44 | 1 | 0 | 5.535125  | -1.238547 | -0.706890 |
| 45 | 1 | 0 | 7.353349  | 0.349063  | -0.502842 |
| 46 | 1 | 0 | 6.936336  | 2.663531  | 0.298020  |
| 47 | 1 | 0 | 4.633456  | 3.353899  | 0.882382  |

|    |   |   |           |           |           |
|----|---|---|-----------|-----------|-----------|
| 13 | 6 | 0 | 2.874480  | -0.793731 | -0.107420 |
| 14 | 6 | 0 | 3.084340  | -2.156300 | -0.381168 |
| 15 | 6 | 0 | 2.042203  | -3.040588 | -0.419812 |
| 16 | 6 | 0 | 0.738629  | -2.585247 | -0.254838 |
| 17 | 1 | 0 | -4.910562 | 1.843972  | 0.478406  |
| 18 | 1 | 0 | -5.510010 | 4.242511  | 0.285650  |
| 19 | 1 | 0 | -3.809654 | 5.882835  | -0.449250 |
| 20 | 1 | 0 | -1.518572 | 5.120208  | -0.987047 |
| 21 | 1 | 0 | -0.931216 | 2.729360  | -0.783662 |
| 22 | 1 | 0 | 2.193166  | -4.097644 | -0.590079 |
| 23 | 1 | 0 | 4.083923  | -2.535999 | -0.524887 |
| 24 | 6 | 0 | 3.997028  | 0.125999  | -0.013545 |
| 25 | 6 | 0 | 1.383181  | 1.025978  | 0.578643  |
| 26 | 6 | 0 | -4.163839 | -2.476087 | 0.373692  |
| 27 | 6 | 0 | -3.800059 | -3.803044 | 0.292112  |
| 28 | 6 | 0 | -2.473387 | -4.182396 | 0.072716  |
| 29 | 6 | 0 | -3.194181 | -1.471422 | 0.246848  |
| 30 | 6 | 0 | -1.858757 | -1.861920 | 0.069082  |
| 31 | 6 | 0 | -1.513213 | -3.202725 | -0.046205 |
| 32 | 8 | 0 | -0.224046 | -3.554693 | -0.315092 |
| 33 | 1 | 0 | -2.182111 | -5.219264 | -0.017796 |
| 34 | 1 | 0 | -4.555208 | -4.572025 | 0.387516  |
| 35 | 1 | 0 | -5.191428 | -2.172635 | 0.516531  |
| 36 | 6 | 0 | 3.769459  | 1.450432  | 0.408932  |
| 37 | 6 | 0 | 2.439011  | 1.852681  | 0.733181  |
| 38 | 6 | 0 | 5.318571  | -0.244490 | -0.334235 |
| 39 | 6 | 0 | 6.354441  | 0.651415  | -0.230974 |
| 40 | 6 | 0 | 6.121091  | 1.963667  | 0.203567  |
| 41 | 6 | 0 | 4.844584  | 2.352423  | 0.516672  |
| 42 | 1 | 0 | 0.398334  | 1.374909  | 0.831144  |
| 43 | 1 | 0 | 2.282897  | 2.856378  | 1.110712  |
| 44 | 1 | 0 | 5.537208  | -1.241616 | -0.687321 |
| 45 | 1 | 0 | 7.357903  | 0.340891  | -0.491653 |
| 46 | 1 | 0 | 6.942827  | 2.662919  | 0.285432  |
| 47 | 1 | 0 | 4.641425  | 3.363355  | 0.849553  |

### 7 (Cation, Gas Phase):

| Center Number | Atomic Number | Atomic Type | Coordinates (Angstroms) |           |           |
|---------------|---------------|-------------|-------------------------|-----------|-----------|
|               |               |             | X                       | Y         | Z         |
| 1             | 7             | 0           | -0.940377               | -0.864513 | -0.000548 |
| 2             | 7             | 0           | -1.242245               | 0.381950  | -0.072142 |
| 3             | 7             | 0           | -3.551106               | -0.102319 | 0.124431  |
| 4             | 6             | 0           | -2.559686               | 0.741646  | -0.022702 |
| 5             | 6             | 0           | -2.817249               | 2.184947  | -0.122795 |
| 6             | 6             | 0           | -4.091988               | 2.670265  | -0.171350 |
| 7             | 6             | 0           | -1.808290               | 3.066126  | -0.516766 |
| 8             | 6             | 0           | -2.077249               | 4.420798  | -0.613023 |
| 9             | 6             | 0           | -4.349405               | 4.026370  | 0.081880  |
| 10            | 6             | 0           | -3.344059               | 4.902127  | -0.309952 |
| 11            | 6             | 0           | 0.429947                | -1.249653 | 0.003124  |
| 12            | 6             | 0           | 1.520861                | -0.324894 | 0.142536  |
| 13            | 6             | 0           | 2.828813                | -0.823944 | -0.088763 |
| 14            | 6             | 0           | 3.010575                | -2.199696 | -0.335792 |
| 15            | 6             | 0           | 1.972719                | -3.086483 | -0.345223 |
| 16            | 6             | 0           | 0.678085                | -2.611082 | -0.173270 |
| 17            | 1             | 0           | -4.867936               | 1.980095  | 0.472233  |
| 18            | 1             | 0           | -5.335776               | 4.403073  | 0.316698  |
| 19            | 1             | 0           | -3.549820               | 5.962067  | -0.382676 |
| 20            | 1             | 0           | -1.298878               | 5.102226  | -0.929014 |
| 21            | 1             | 0           | -0.824941               | 2.689931  | -0.765503 |
| 22            | 1             | 0           | 2.117442                | -4.147406 | -0.491453 |
| 23            | 1             | 0           | 4.006093                | -2.589017 | -0.484279 |
| 24            | 6             | 0           | 3.975103                | 0.061132  | -0.026787 |
| 25            | 6             | 0           | 1.384054                | 1.031380  | 0.577660  |
| 26            | 6             | 0           | -4.252076               | -2.397538 | 0.246606  |
| 27            | 6             | 0           | -3.896702               | -3.722835 | 0.216843  |
| 28            | 6             | 0           | -2.560596               | -4.138146 | 0.077285  |
| 29            | 6             | 0           | -3.255178               | -1.414651 | 0.145273  |
| 30            | 6             | 0           | -1.904445               | -1.832754 | 0.048243  |
| 31            | 6             | 0           | -1.572697               | -3.195689 | -0.010068 |
| 32            | 8             | 0           | -0.288797               | -3.558327 | -0.198518 |
| 33            | 1             | 0           | -2.297685               | -5.185511 | 0.025996  |
| 34            | 1             | 0           | -4.665038               | -4.481301 | 0.289280  |
| 35            | 1             | 0           | -5.280209               | -2.075827 | 0.329205  |
| 36            | 6             | 0           | 3.781985                | 1.400000  | 0.373515  |
| 37            | 6             | 0           | 2.470176                | 1.832504  | 0.704346  |
| 38            | 6             | 0           | 5.284706                | -0.348560 | -0.351275 |
| 39            | 6             | 0           | 6.336285                | 0.529002  | -0.272851 |
| 40            | 6             | 0           | 6.137424                | 1.856159  | 0.139546  |
| 41            | 6             | 0           | 4.876485                | 2.282947  | 0.457164  |
| 42            | 1             | 0           | 0.422870                | 1.424593  | 0.848396  |
| 43            | 1             | 0           | 2.339895                | 2.844435  | 1.069345  |
| 44            | 1             | 0           | 5.486253                | -1.354560 | -0.687832 |
| 45            | 1             | 0           | 7.330623                | 0.193375  | -0.535846 |
| 46            | 1             | 0           | 6.977808                | 2.534420  | 0.200425  |
| 47            | 1             | 0           | 4.700188                | 3.303335  | 0.774354  |

### 7 (Anion, Gas Phase):

| Center Number | Atomic Number | Atomic Type | Coordinates (Angstroms) |           |           |
|---------------|---------------|-------------|-------------------------|-----------|-----------|
|               |               |             | X                       | Y         | Z         |
| 1             | 7             | 0           | 0.815429                | -0.028420 | -0.310271 |
| 2             | 7             | 0           | -0.481233               | -0.476215 | 0.024035  |
| 3             | 7             | 0           | -1.294822               | 1.731454  | -0.443085 |
| 4             | 6             | 0           | -1.410438               | 0.426118  | -0.155453 |
| 5             | 6             | 0           | -2.803333               | -0.092509 | 0.027160  |
| 6             | 6             | 0           | -3.887771               | 0.768387  | -0.116618 |
| 7             | 6             | 0           | -3.042308               | -1.434050 | 0.326447  |
| 8             | 6             | 0           | -4.338648               | -1.899957 | 0.482771  |
| 9             | 6             | 0           | -5.186327               | 0.298759  | 0.032198  |
| 10            | 6             | 0           | -5.417809               | -1.036052 | 0.334466  |
| 11            | 6             | 0           | 1.873331                | -0.899633 | -0.196545 |
| 12            | 6             | 0           | 1.775798                | -2.301478 | -0.454945 |
| 13            | 6             | 0           | 2.893366                | -3.151874 | -0.228151 |
| 14            | 6             | 0           | 4.111852                | -2.589119 | 0.162682  |
| 15            | 6             | 0           | 4.224209                | -1.223480 | 0.316430  |
| 16            | 6             | 0           | 3.134156                | -0.389676 | 0.141610  |
| 17            | 1             | 0           | -3.680274               | 1.804732  | -0.346530 |
| 18            | 1             | 0           | -6.020688               | 0.980044  | -0.086057 |
| 19            | 1             | 0           | -6.430351               | -1.402760 | 0.453565  |
| 20            | 1             | 0           | -4.509498               | -2.943514 | 0.719236  |
| 21            | 1             | 0           | -2.195114               | -2.098031 | 0.439245  |
| 22            | 1             | 0           | 5.163039                | -0.764129 | 0.598873  |
| 23            | 1             | 0           | 4.985713                | -3.203106 | 0.317925  |
| 24            | 6             | 0           | 2.750077                | -4.586959 | -0.440556 |
| 25            | 6             | 0           | 0.587955                | -2.870853 | -1.028224 |
| 26            | 6             | 0           | 0.234953                | 3.595075  | -0.170450 |
| 27            | 6             | 0           | 1.518023                | 4.061786  | 0.080739  |
| 28            | 6             | 0           | 2.579349                | 3.185159  | 0.260406  |
| 29            | 6             | 0           | -0.026966               | 2.221521  | -0.265040 |
| 30            | 6             | 0           | 1.064489                | 1.350576  | -0.112382 |
| 31            | 6             | 0           | 3.223335                | 1.822276  | 0.169567  |
| 32            | 8             | 0           | 3.381386                | 0.951294  | 0.327369  |
| 33            | 1             | 0           | 3.587532                | 3.523053  | 0.456468  |
| 34            | 1             | 0           | 1.696217                | 5.128713  | 0.142100  |
| 35            | 1             | 0           | -0.597931               | 4.276016  | -0.288634 |
| 36            | 6             | 0           | 1.547057                | -5.097338 | -0.973940 |
| 37            | 6             | 0           | 0.486192                | -4.191838 | -1.290742 |
| 38            | 6             | 0           | 3.771842                | -5.505768 | -0.133076 |
| 39            | 6             | 0           | 3.619308                | -6.855767 | -0.349450 |
| 40            | 6             | 0           | 2.426530                | -7.353568 | -0.889742 |
| 41            | 6             | 0           | 1.410563                | -6.481050 | -1.192538 |
| 42            | 1             | 0           | -0.231116               | -2.209175 | -1.259338 |
| 43            | 1             | 0           | -0.415567               | -4.589742 | -1.741499 |
| 44            | 1             | 0           | 4.697922                | -5.153782 | 0.299062  |
| 45            | 1             | 0           | 4.424267                | -7.534538 | -0.096321 |
| 46            | 1             | 0           | 2.306490                | -8.416095 | -1.061065 |
| 47            | 1             | 0           | 0.476810                | -6.847091 | -1.604903 |

### 8 (Neutral, in DCM):

| Center Number | Atomic Number | Atomic Type | Coordinates (Angstroms) |   |   |
|---------------|---------------|-------------|-------------------------|---|---|
|               |               |             | X                       | Y | Z |

### 8 (Neutral, Gas Phase):

| Center Number | Atomic Number | Atomic Type | Coordinates (Angstroms) |   |   |
|---------------|---------------|-------------|-------------------------|---|---|
|               |               |             | X                       | Y | Z |

|    |   |   |           |           |           |
|----|---|---|-----------|-----------|-----------|
| 1  | 7 | 0 | -2.614119 | 0.935256  | 0.193039  |
| 2  | 7 | 0 | -3.897627 | 0.528655  | 0.164248  |
| 3  | 7 | 0 | -3.261344 | -1.463603 | -0.951620 |
| 4  | 6 | 0 | -4.149082 | -0.642034 | -0.404992 |
| 5  | 6 | 0 | -5.582858 | -1.044907 | -0.426944 |
| 6  | 6 | 0 | -5.939402 | -2.313602 | -0.880440 |
| 7  | 6 | 0 | -6.581088 | -0.170357 | 0.004062  |
| 8  | 6 | 0 | -7.911148 | -0.561355 | -0.017917 |
| 9  | 6 | 0 | -7.271107 | -2.702659 | -0.899595 |
| 10 | 6 | 0 | -8.260780 | -1.828489 | -0.469100 |
| 11 | 6 | 0 | -2.417787 | 2.235925  | 0.746140  |
| 12 | 6 | 0 | -3.042994 | 2.554120  | 1.945071  |
| 13 | 6 | 0 | -2.885136 | 3.825098  | 2.476929  |
| 14 | 6 | 0 | -2.108450 | 4.769413  | 1.817252  |
| 15 | 6 | 0 | -1.494552 | 4.443396  | 0.614536  |
| 16 | 6 | 0 | -1.651333 | 3.177284  | 0.069326  |
| 17 | 1 | 0 | -5.166287 | -2.992198 | -1.214214 |
| 18 | 1 | 0 | -7.536399 | -3.692249 | -1.250093 |
| 19 | 1 | 0 | -9.300122 | -2.132603 | -0.484643 |
| 20 | 1 | 0 | -8.677537 | 0.126157  | 0.317866  |
| 21 | 1 | 0 | -6.310483 | 0.817313  | 0.351949  |
| 22 | 1 | 0 | -1.193161 | 2.925292  | -0.878857 |
| 23 | 1 | 0 | -0.898826 | 5.178607  | 0.088692  |
| 24 | 1 | 0 | -1.985943 | 5.759421  | 2.237620  |
| 25 | 1 | 0 | -3.369153 | 4.075103  | 3.412366  |
| 26 | 1 | 0 | -3.644441 | 1.807328  | 2.446467  |
| 27 | 6 | 0 | -0.939557 | -1.930960 | -1.336177 |
| 28 | 6 | 0 | 0.385520  | -1.594346 | -1.190065 |
| 29 | 6 | 0 | 0.760095  | -0.413139 | -0.525911 |
| 30 | 6 | 0 | -1.953411 | -1.094977 | -0.844209 |
| 31 | 6 | 0 | -1.575823 | 0.121122  | -0.230344 |
| 32 | 6 | 0 | -0.229594 | 0.439837  | -0.057558 |
| 33 | 1 | 0 | 0.051786  | 1.349455  | 0.453754  |
| 34 | 6 | 0 | 2.189540  | -0.034956 | -0.367556 |
| 35 | 1 | 0 | 1.153172  | -2.245719 | -1.587661 |
| 36 | 1 | 0 | -1.234889 | -2.846041 | -1.833889 |
| 37 | 6 | 0 | 3.135808  | -0.912555 | 0.033826  |
| 38 | 6 | 0 | 4.591581  | -0.603388 | -0.013868 |
| 39 | 6 | 0 | 2.797222  | -2.263172 | 0.562686  |
| 40 | 6 | 0 | 5.179254  | -0.053830 | -1.154719 |
| 41 | 6 | 0 | 6.540529  | 0.210821  | -1.192409 |
| 42 | 6 | 0 | 7.337876  | -0.066562 | -0.088464 |
| 43 | 6 | 0 | 6.765986  | -0.624594 | 1.048079  |
| 44 | 6 | 0 | 5.406690  | -0.901176 | 1.079895  |
| 45 | 6 | 0 | 3.457026  | -3.393738 | 0.078256  |
| 46 | 6 | 0 | 1.840793  | -2.424150 | 1.566271  |
| 47 | 6 | 0 | 1.532091  | -3.685973 | 2.053626  |
| 48 | 6 | 0 | 3.138250  | -4.657320 | 0.554052  |
| 49 | 6 | 0 | 2.172049  | -4.807952 | 1.541883  |
| 50 | 6 | 0 | 2.493268  | 1.390524  | -0.680472 |
| 51 | 6 | 0 | 2.016293  | 1.967038  | -1.859212 |
| 52 | 6 | 0 | 2.277363  | 3.297450  | -2.154403 |
| 53 | 6 | 0 | 3.001154  | 4.080240  | -1.262871 |
| 54 | 6 | 0 | 3.461413  | 3.522213  | -0.076679 |
| 55 | 6 | 0 | 3.210289  | 2.187799  | 0.211440  |
| 56 | 1 | 0 | 4.563877  | 0.163307  | -2.019602 |
| 57 | 1 | 0 | 6.979841  | 0.631856  | -2.088318 |
| 58 | 1 | 0 | 8.399742  | 0.143563  | -0.116773 |
| 59 | 1 | 0 | 7.379701  | -0.850808 | 1.911325  |
| 60 | 1 | 0 | 4.967768  | -1.345606 | 1.965801  |
| 61 | 1 | 0 | 4.216925  | -3.279882 | -0.686483 |
| 62 | 1 | 0 | 1.338342  | -1.551557 | 1.966834  |
| 63 | 1 | 0 | 0.789609  | -3.793084 | 2.834708  |
| 64 | 1 | 0 | 3.646083  | -5.526317 | 0.154313  |
| 65 | 1 | 0 | 1.926125  | -5.793533 | 1.916994  |
| 66 | 1 | 0 | 1.441836  | 1.363465  | -2.552956 |
| 67 | 1 | 0 | 1.911458  | 3.723432  | -3.080596 |
| 68 | 1 | 0 | 3.200542  | 5.120342  | -1.488858 |
| 69 | 1 | 0 | 4.015681  | 4.128069  | 0.629437  |
| 70 | 1 | 0 | 3.570473  | 1.758195  | 1.138603  |

|    |   |   |           |           |           |
|----|---|---|-----------|-----------|-----------|
| 1  | 7 | 0 | -2.613050 | 0.953634  | 0.171333  |
| 2  | 7 | 0 | -3.895966 | 0.541738  | 0.167829  |
| 3  | 7 | 0 | -3.267600 | -1.455167 | -0.950081 |
| 4  | 6 | 0 | -4.149421 | -0.634062 | -0.392324 |
| 5  | 6 | 0 | -5.578939 | -1.044254 | -0.391627 |
| 6  | 6 | 0 | -5.930382 | -2.313854 | -0.842778 |
| 7  | 6 | 0 | -6.574630 | -0.171779 | 0.055328  |
| 8  | 6 | 0 | -7.901051 | -0.577826 | 0.051832  |
| 9  | 6 | 0 | -7.258489 | -2.711836 | -0.843196 |
| 10 | 6 | 0 | -8.247124 | -1.846048 | -0.396286 |
| 11 | 6 | 0 | -2.413642 | 2.267984  | 0.680573  |
| 12 | 6 | 0 | -3.120650 | 2.664062  | 1.809619  |
| 13 | 6 | 0 | -2.955333 | 3.948199  | 2.302469  |
| 14 | 6 | 0 | -2.091808 | 4.836150  | 1.675136  |
| 15 | 6 | 0 | -1.400265 | 4.437522  | 0.539520  |
| 16 | 6 | 0 | -1.563071 | 3.157498  | 0.032914  |
| 17 | 1 | 0 | -5.150414 | -2.976825 | -1.190496 |
| 18 | 1 | 0 | -7.522614 | -3.701444 | -1.193241 |
| 19 | 1 | 0 | -9.284066 | -2.157445 | -0.397916 |
| 20 | 1 | 0 | -8.668022 | 0.102877  | 0.398573  |
| 21 | 1 | 0 | -6.298619 | 0.810341  | 0.398138  |
| 22 | 1 | 0 | -1.038556 | 2.853886  | -0.863846 |
| 23 | 1 | 0 | -0.733263 | 5.124908  | 0.035848  |
| 24 | 1 | 0 | -1.962710 | 5.836412  | 2.066775  |
| 25 | 1 | 0 | -3.502893 | 4.253797  | 3.184498  |
| 26 | 1 | 0 | -3.795476 | 1.962156  | 2.279181  |
| 27 | 6 | 0 | -0.950332 | -1.935097 | -1.330304 |
| 28 | 6 | 0 | 0.376000  | -1.610133 | -1.179845 |
| 29 | 6 | 0 | 0.756805  | -0.432905 | -0.513167 |
| 30 | 6 | 0 | -1.961988 | -1.091232 | -0.844272 |
| 31 | 6 | 0 | -1.577137 | 0.124931  | -0.234647 |
| 32 | 6 | 0 | -0.229594 | 0.425645  | -0.048243 |
| 33 | 1 | 0 | 0.059663  | 1.330026  | 0.466672  |
| 34 | 6 | 0 | 2.184327  | -0.055328 | -0.348323 |
| 35 | 1 | 0 | 1.142014  | -2.268499 | -1.568136 |
| 36 | 1 | 0 | -1.257713 | -2.847633 | -1.823385 |
| 37 | 6 | 0 | 3.138730  | -0.934399 | 0.031117  |
| 38 | 6 | 0 | 4.590698  | -0.613744 | -0.019782 |
| 39 | 6 | 0 | 2.811974  | -2.294664 | 0.538760  |
| 40 | 6 | 0 | 5.162801  | -0.021850 | -1.146120 |
| 41 | 6 | 0 | 6.520465  | 0.253737  | -1.188303 |
| 42 | 6 | 0 | 7.330302  | -0.055450 | -0.103408 |
| 43 | 6 | 0 | 6.774612  | -0.655655 | 1.018307  |
| 44 | 6 | 0 | 5.418653  | -0.942735 | 1.054393  |
| 45 | 6 | 0 | 3.505346  | -3.408739 | 0.065380  |
| 46 | 6 | 0 | 1.833324  | -2.481415 | 1.515373  |
| 47 | 6 | 0 | 1.536703  | -3.750683 | 1.986199  |
| 48 | 6 | 0 | 3.200465  | -4.680378 | 0.526388  |
| 49 | 6 | 0 | 2.213248  | -4.855614 | 1.487156  |
| 50 | 6 | 0 | 2.476270  | 1.379889  | -0.624769 |
| 51 | 6 | 0 | 1.972101  | 1.989511  | -1.774859 |
| 52 | 6 | 0 | 2.212196  | 3.331036  | -2.030696 |
| 53 | 6 | 0 | 2.942865  | 4.092150  | -1.127327 |
| 54 | 6 | 0 | 3.431714  | 3.500863  | 0.029594  |
| 55 | 6 | 0 | 3.201695  | 2.155743  | 0.277719  |
| 56 | 1 | 0 | 4.534254  | 0.221811  | -1.993612 |
| 57 | 1 | 0 | 6.947865  | 0.708167  | -2.027865 |
| 58 | 1 | 0 | 8.390013  | 0.162240  | -0.135601 |
| 59 | 1 | 0 | 7.399049  | -0.906997 | 1.866071  |
| 60 | 1 | 0 | 4.989481  | -1.424837 | 1.924733  |
| 61 | 1 | 0 | 4.283695  | -3.272334 | -0.676045 |
| 62 | 1 | 0 | 1.301652  | -1.620614 | 1.902018  |
| 63 | 1 | 0 | 0.775603  | -3.877449 | 2.745332  |
| 64 | 1 | 0 | 3.736831  | -5.536325 | 0.137194  |
| 65 | 1 | 0 | 1.978364  | -5.847419 | 1.851142  |
| 66 | 1 | 0 | 1.390095  | 1.400017  | -2.473970 |
| 67 | 1 | 0 | 1.826972  | 3.782560  | -2.936251 |
| 68 | 1 | 0 | 3.127134  | 5.140695  | -1.322649 |
| 69 | 1 | 0 | 3.993262  | 4.088905  | 0.744048  |
| 70 | 1 | 0 | 3.586154  | 1.696683  | 1.180084  |

### 8 (Cation, Gas Phase):

| Center Number | Atomic Number | Atomic Type | Coordinates (Angstroms) |           |           |
|---------------|---------------|-------------|-------------------------|-----------|-----------|
|               |               |             | X                       | Y         | Z         |
| 1             | 7             | 0           | -2.618797               | 0.897057  | 0.160661  |
| 2             | 7             | 0           | -3.866586               | 0.531171  | 0.104858  |
| 3             | 7             | 0           | -3.225656               | -1.542343 | -0.801658 |
| 4             | 6             | 0           | -4.152899               | -0.692401 | -0.353647 |
| 5             | 6             | 0           | -5.570321               | -1.084014 | -0.377315 |
| 6             | 6             | 0           | -5.920319               | -2.362812 | -0.810721 |
| 7             | 6             | 0           | -6.563108               | -0.190944 | 0.029769  |
| 8             | 6             | 0           | -7.891150               | -0.578408 | 0.002311  |
| 9             | 6             | 0           | -7.251176               | -2.742978 | -0.834107 |
| 10            | 6             | 0           | -8.237069               | -1.853081 | -0.428571 |
| 11            | 6             | 0           | -2.413563               | 2.253564  | 0.626340  |
| 12            | 6             | 0           | -3.036742               | 2.641584  | 1.800553  |
| 13            | 6             | 0           | -2.863219               | 3.943663  | 2.241194  |
| 14            | 6             | 0           | -2.089336               | 4.832160  | 1.506058  |
| 15            | 6             | 0           | -1.486129               | 4.426177  | 0.322865  |
| 16            | 6             | 0           | -1.645600               | 3.126412  | -0.129772 |
| 17            | 1             | 0           | -5.147610               | -3.049234 | -1.127217 |
| 18            | 1             | 0           | -7.520674               | -3.735338 | -1.169547 |
| 19            | 1             | 0           | -9.276868               | -2.152588 | -0.448560 |
| 20            | 1             | 0           | -8.659529               | 0.115219  | 0.316360  |
| 21            | 1             | 0           | -6.293054               | 0.802535  | 0.359474  |

### 8 (Anion, Gas Phase):

| Center Number | Atomic Number | Atomic Type | Coordinates (Angstroms) |           |           |
|---------------|---------------|-------------|-------------------------|-----------|-----------|
|               |               |             | X                       | Y         | Z         |
| 1             | 7             | 0           | -2.646694               | 1.070872  | 0.039748  |
| 2             | 7             | 0           | -3.873984               | 0.451185  | 0.331713  |
| 3             | 7             | 0           | -3.254012               | -1.288617 | -1.186340 |
| 4             | 6             | 0           | -4.091267               | -0.628565 | -0.361362 |
| 5             | 6             | 0           | -5.447791               | -1.233148 | -0.178163 |
| 6             | 6             | 0           | -5.771059               | -2.419376 | -0.830965 |
| 7             | 6             | 0           | -6.408486               | -0.625703 | 0.629762  |
| 8             | 6             | 0           | -7.661203               | -1.197860 | 0.786940  |
| 9             | 6             | 0           | -7.028739               | -2.988712 | -0.678444 |
| 10            | 6             | 0           | -7.977925               | -2.383073 | 0.132468  |
| 11            | 6             | 0           | -2.564374               | 2.418041  | 0.310156  |
| 12            | 6             | 0           | -3.567526               | 3.050594  | 1.068594  |
| 13            | 6             | 0           | -3.507712               | 4.409651  | 1.323830  |
| 14            | 6             | 0           | -2.470214               | 5.195342  | 0.838324  |
| 15            | 6             | 0           | -1.489273               | 4.580676  | 0.067421  |
| 16            | 6             | 0           | -1.526777               | 3.224460  | -0.197787 |
| 17            | 1             | 0           | -5.014028               | -2.875427 | -1.454184 |
| 18            | 1             | 0           | -7.266825               | -3.911164 | -1.194590 |
| 19            | 1             | 0           | -8.958119               | -2.828523 | 0.254407  |
| 20            | 1             | 0           | -8.396521               | -0.716845 | 1.420932  |
| 21            | 1             | 0           | -6.151474               | 0.299334  | 1.127988  |

|    |   |   |           |           |           |    |   |   |           |           |           |
|----|---|---|-----------|-----------|-----------|----|---|---|-----------|-----------|-----------|
| 22 | 1 | 0 | -1.190116 | 2.802708  | -1.057277 | 22 | 1 | 0 | -0.761236 | 2.790036  | -0.823687 |
| 23 | 1 | 0 | -0.892445 | 5.120524  | -0.255869 | 23 | 1 | 0 | -0.673125 | 5.164811  | -0.342692 |
| 24 | 1 | 0 | -1.959447 | 5.847645  | 1.855457  | 24 | 1 | 0 | -2.429809 | 6.256278  | 1.046842  |
| 25 | 1 | 0 | -3.333926 | 4.263158  | 3.160991  | 25 | 1 | 0 | -4.293232 | 4.862165  | 1.918660  |
| 26 | 1 | 0 | -3.641027 | 1.934450  | 2.352567  | 26 | 1 | 0 | -4.382093 | 2.451500  | 1.444057  |
| 27 | 6 | 0 | -0.923638 | -2.053168 | -1.163842 | 27 | 6 | 0 | -0.916863 | -1.716132 | -1.583189 |
| 28 | 6 | 0 | 0.371961  | -1.691164 | -1.017264 | 28 | 6 | 0 | 0.412587  | -1.421477 | -1.341095 |
| 29 | 6 | 0 | 0.752179  | -0.440932 | -0.407604 | 29 | 6 | 0 | 0.775877  | -0.340358 | -0.538217 |
| 30 | 6 | 0 | -1.959391 | -1.183625 | -0.716035 | 30 | 6 | 0 | -1.953224 | -0.929951 | -1.053170 |
| 31 | 6 | 0 | -1.581815 | 0.088676  | -0.173989 | 31 | 6 | 0 | -1.575058 | 0.236452  | -0.331538 |
| 32 | 6 | 0 | -0.231239 | 0.432699  | -0.006783 | 32 | 6 | 0 | -0.252824 | 0.479762  | -0.032082 |
| 33 | 1 | 0 | 0.041016  | 1.376714  | 0.439767  | 33 | 1 | 0 | 0.006410  | 1.331348  | 0.583167  |
| 34 | 6 | 0 | 2.166871  | -0.039703 | -0.302014 | 34 | 6 | 0 | 2.182380  | -0.018098 | -0.255356 |
| 35 | 1 | 0 | 1.155001  | -2.344256 | -1.377551 | 35 | 1 | 0 | 1.187573  | -2.043017 | -1.774371 |
| 36 | 1 | 0 | -1.216664 | -2.990564 | -1.616174 | 36 | 1 | 0 | -1.198376 | -2.569572 | -2.187029 |
| 37 | 6 | 0 | 3.156420  | -0.919253 | 0.007692  | 37 | 6 | 0 | 3.128316  | -0.954130 | 0.029433  |
| 38 | 6 | 0 | 4.592802  | -0.570773 | -0.092148 | 38 | 6 | 0 | 4.582365  | -0.643976 | 0.028876  |
| 39 | 6 | 0 | 2.860011  | -2.281659 | 0.510139  | 39 | 6 | 0 | 2.785263  | -2.360748 | 0.371293  |
| 40 | 6 | 0 | 5.098845  | 0.108887  | -1.201921 | 40 | 6 | 0 | 5.169126  | 0.094323  | -1.001632 |
| 41 | 6 | 0 | 6.448465  | 0.405884  | -1.287480 | 41 | 6 | 0 | 6.525878  | 0.379215  | -0.995337 |
| 42 | 6 | 0 | 7.309581  | 0.041598  | -0.259740 | 42 | 6 | 0 | 7.332584  | -0.073410 | 0.040182  |
| 43 | 6 | 0 | 6.818221  | -0.639414 | 0.845240  | 43 | 6 | 0 | 6.767643  | -0.823797 | 1.063602  |
| 44 | 6 | 0 | 5.471417  | -0.957227 | 0.921972  | 44 | 6 | 0 | 5.411620  | -1.111308 | 1.052443  |
| 45 | 6 | 0 | 3.525473  | -3.387627 | -0.024561 | 45 | 6 | 0 | 3.538424  | -3.421755 | -0.133634 |
| 46 | 6 | 0 | 1.928414  | -2.481246 | 1.530529  | 46 | 6 | 0 | 1.735841  | -2.656975 | 1.246415  |
| 47 | 6 | 0 | 1.642832  | -3.760292 | 1.984034  | 47 | 6 | 0 | 1.443058  | -3.965713 | 1.588828  |
| 48 | 6 | 0 | 3.223385  | -4.666074 | 0.413910  | 48 | 6 | 0 | 3.241916  | -4.735395 | 0.203574  |
| 49 | 6 | 0 | 2.279806  | -4.855494 | 1.417792  | 49 | 6 | 0 | 2.191917  | -5.014068 | 1.065799  |
| 50 | 6 | 0 | 2.419843  | 1.413779  | -0.519286 | 50 | 6 | 0 | 2.513772  | 1.436154  | -0.287878 |
| 51 | 6 | 0 | 1.936455  | 2.050408  | -1.663532 | 51 | 6 | 0 | 2.037680  | 2.241355  | -1.323521 |
| 52 | 6 | 0 | 2.157277  | 3.404162  | -1.866286 | 52 | 6 | 0 | 2.314652  | 3.599727  | -1.354071 |
| 53 | 6 | 0 | 2.848586  | 4.145451  | -0.915867 | 53 | 6 | 0 | 3.058197  | 4.183012  | -0.336280 |
| 54 | 6 | 0 | 3.318318  | 3.524506  | 0.233103  | 54 | 6 | 0 | 3.519753  | 3.396398  | 0.710332  |
| 55 | 6 | 0 | 3.107574  | 2.167156  | 0.429303  | 55 | 6 | 0 | 3.250298  | 2.036466  | 0.732756  |
| 56 | 1 | 0 | 4.431325  | 0.394342  | -2.004933 | 56 | 1 | 0 | 4.545277  | 0.448433  | -1.812769 |
| 57 | 1 | 0 | 6.830590  | 0.920670  | -2.159130 | 57 | 1 | 0 | 6.955465  | 0.954839  | -1.805957 |
| 58 | 1 | 0 | 8.362929  | 0.280748  | -0.325001 | 58 | 1 | 0 | 8.392041  | 0.149754  | 0.046118  |
| 59 | 1 | 0 | 7.485407  | -0.930474 | 1.645681  | 59 | 1 | 0 | 7.386129  | -1.185900 | 1.875684  |
| 60 | 1 | 0 | 5.092211  | -1.500998 | 1.778804  | 60 | 1 | 0 | 4.977695  | -1.703004 | 1.849928  |
| 61 | 1 | 0 | 4.272414  | -3.237030 | -0.794640 | 61 | 1 | 0 | 4.364068  | -3.210661 | -0.803118 |
| 62 | 1 | 0 | 1.444206  | -1.623856 | 1.982514  | 62 | 1 | 0 | 1.137149  | -1.846626 | 1.642955  |
| 63 | 1 | 0 | 0.929790  | -3.901561 | 2.785645  | 63 | 1 | 0 | 0.620876  | -4.168841 | 2.263287  |
| 64 | 1 | 0 | 3.730265  | -5.517406 | -0.020981 | 64 | 1 | 0 | 3.832885  | -5.542194 | -0.212514 |
| 65 | 1 | 0 | 2.055617  | -5.854409 | 1.768245  | 65 | 1 | 0 | 1.956842  | -6.037795 | 1.328842  |
| 66 | 1 | 0 | 1.402459  | 1.473518  | -2.410890 | 66 | 1 | 0 | 1.438853  | 1.786948  | -2.104368 |
| 67 | 1 | 0 | 1.800371  | 3.878468  | -2.771712 | 67 | 1 | 0 | 1.938639  | 4.206278  | -2.168749 |
| 68 | 1 | 0 | 3.025209  | 5.201303  | -1.074012 | 68 | 1 | 0 | 3.263901  | 5.245887  | -0.351584 |
| 69 | 1 | 0 | 3.855395  | 4.096043  | 0.978622  | 69 | 1 | 0 | 4.084230  | 3.845282  | 1.518119  |
| 70 | 1 | 0 | 3.486279  | 1.681612  | 1.320434  | 70 | 1 | 0 | 3.606659  | 1.425201  | 1.552784  |

## 14. References

- [S1] Gubaidullin, A. T.; Buzykin, B. I.; Litvinov, I. A.; Gazetdinova N. G. Molecular and Crystal Structure of a Superstable Free Radical, 1,3-Diphenyl-1,4-dihydro-1,2,4-benzotriazin-4-yl. *Russ. J. Gen. Chem.*, **2004**, *74* (6), 939–943.
- [S2] Zheng, Y.; Miao, M. s.; Kemei, M. C.; Seshadri, R.; Wudl, F. The Pyreno-Triazinyl Radical – Magnetic and Sensor Properties. *Isr. J. Chem.* **2014**, *54* (5-6), 774–778.
- [S3] Berezin, A. A.; Constantinides, C. P.; Drouza, C.; Manoli, M.; Koutentis, P. A. From Blatter Radical to 7-Substituted 1,3-Diphenyl-1,4-dihydrothiazolo[5',4':4,5] benzo[1,2-e][1,2,4]triazin-4-yls: Toward Multifunctional Materials. *Org. Lett.* **2012**, *14* (21), 5586–5589.
- [S4] Kaszyński, P.; Constantinides, C. P.; Young, V. G. The Planar Blatter Radical: Structural Chemistry of 1,4-Dihydrobenzo[e][1,2,4]triazin-4-yls. *Agnew. Chem. Int. Ed.* **2016**, *55* (37), 11149–11152.
- [S5] Constantinides, C. P.; Koutentis, P. A.; Krassos, H.; Rawson, J. M.; Tasiopoulos, A. J. Characterization and Magnetic Properties of a “Super Stable” Radical 1,3-Diphenyl-7-trifluoromethyl-1,4-dihydro-1,2,4-benzotriazin-4-yl. *J. Org. Chem.* **2011**, *76* (8), 2798–2806.
- [S6] Zissimou, G. A.; Bartos, P.; Pietrzak, A.; Kaszyński, P. “Upper” Ring Expansion of the Planar Blatter Radical

---

via Photocyclization: Limitations and Impact on the Electronic Structure. *J. Org. Chem.* **2022**, *87* (7), 4829–4837.

- [S7] Hu, X.; Chen, H.; Zhao, L.; Miao, M.; Zheng, Y. Observation of a Solid-State-Induced Thermally Populated Spin-Triplet State in Radical Regioisomers. *Chem. Mater.* **2019**, *31* (24), 10256–10262.
- [S8] Ciccullo, F.; Gallagher, N. M.; Geladari, O.; Chassé, T.; Rajca, A.; Casu, M. B. A Derivative of the Blatter Radical as a Potential Metal-Free Magnet for Stable Thin Films and Interfaces. *ACS Appl. Mater. Interfaces* **2016**, *8* (3), 1805–1812.
- [S9] Savva, A. C.; Mirallai, S. I.; Zissimou, G. A.; Berezin, A. A.; Demetriades, M.; Kourtellaris, A.; Constantinides, C. P.; Nicolaides, C.; Trypiniotis, T.; Koutentis, P. A. Preparation of Blatter Radicals via Aza-Wittig Chemistry: The Reaction of N-Aryliminophosphoranes with 1-(Het)aryl-2-aryldiazenes. *J. Org. Chem.* **2017**, *82* (14), 7564–7575.
- [S10] Constantinides, C. P.; Obijalska, E.; Kaszyński, P. Access to 1,4-Dihydrobenzo[e][1,2,4]triazin-4-yl Derivatives. *Org. Lett.* **2016**, *18* (5), 916–919.
- [S11] Jasiński, M.; Szczytko, J.; Pocięcha, D.; Monobe, H.; Kaszyński, P. Substituent-Dependent Magnetic Behavior of Discotic Benzo[e][1,2,4]triazinyls. *J. Am. Chem. Soc.* **2016**, *138* (30), 9421–9424.
- [S12] Hutchison, K. A.; Srdanov, G.; Menon, R.; Gabriel, J.-C. P.; Knight, B.; Wudl, F. A Pressure Sensitive Two-Dimensional Tetracyanoquinodimethane (TCNQ) Salt of a Stable Free Radical. *J. Am. Chem. Soc.* **1996**, *118* (51), 13081–13082.
- [S13] Bartos, P.; Anand, B.; Pietrzak, A.; Kaszyński, P. Functional Planar Blatter Radical through Pschorr-Type Cyclization. *Org. Lett.* **2020**, *22* (1), 180–184.
- [S14] Hande, A. A.; Darrigan, C.; Bartos, P.; Baylère, P.; Pietrzak, A.; Kaszyński, P.; Chrostowska, A. UV-photoelectron spectroscopy of stable radicals: the electronic structure of planar Blatter radicals as materials for organic electronics. *Phys. Chem. Chem. Phys.* **2020**, *22*, (41), 23637–23644.
- [S15] Dąbrowski, M.; Wyrębek, P.; Trzybiński, D.; Woźniak, K.; Grela, K. In a Quest for Selectivity Paired with Activity: A Ruthenium Olefin Metathesis Catalyst Bearing an Unsymmetrical Phenanthrene-Based N-Heterocyclic Carbene. *Chem. Eur. J.* **2020**, *26* (17), 3782–3794.
- [S16] Hisler, K.; Commeureuc, A. G. J.; Zhou, S.-z.; Murphy, J. A. Synthesis of indoles via alkylidenation of acyl hydrazides. *Tetrahedron Letters* **2009**, *50* (26), 3290–3293.
- [S17] Kauffman, J. M.; Moyna, G. Diarylamino Groups as Photostable Auxofluors in 2-Benzoxazolylfluorene, 2,5-Diphenyloxazoles, 1,3,5-Hexatrienes, 1,4-Distyrylbenzenes, and 2,7-Distyrylfluorenes. *J. Org. Chem.* **2003**, *68* (3), 839–853.
- [S18] Stuparu, M. C. Efficient preparation and properties of triazole-linked corannulene derivatives. *Tetrahedron* **2012**, *68* (18), 3527–3531.
- [S19] Berezin, A. A.; Zissimou, G.; Constantinides, C. P.; Beldjoudi, Y.; Rawson, J. M.; Koutentis, P. A. Route to Benzo- and Pyrido-Fused 1,2,4-Triazinyl Radicals via N'-(Het)aryl-N'-[2-nitro(het)aryl] hydrazides. *J. Org. Chem.* **2014**, *79* (1), 314–327.
- [S20] Wang, W.-j.; Zhang, T.; Duan, L.-j.; Zhang, X.-j.; Yan, M. KOt-Bu promoted homocoupling and decomposition of N'-aryl acylhydrazines: Synthesis of unsymmetric N',N'-diaryl acylhydrazines. *Tetrahedron* **2015**, *71* (48), 9073–9080.
- [S21] Dolomanov, O. V.; Bourhis, L. J.; Gildea, R. J.; Howard, J. A. K.; Puschmann, H. OLEX2: a complete structure

- 
- solution, refinement and analysis program. *J. Appl. Crystallogr.* **2009**, *42* (2), 339–341.
- [S22] Sheldrick, G. M. SHELXT– Integrated space-group and crystal-structure determination. *Acta Cryst.* **2015**, *71* (1), 3–8.
- [S23] Sze, S. M.; Ng, K. K.; *Physics of Semiconductor Devices* (2006), John Wiley & Sons, Hoboken, New Jersey.
- [S24] (a) Tauc, J.; Grigorovici, R.; Vancu, A. Optical Properties And Electronic Structure of Amorphous Germanium. *Phys. Status Solidi B* **1966**, *15* (2), 627–637. (b) Davis, E.; Mott, N. Conduction in non-crystalline systems V. Conductivity, optical absorption and photoconductivity in amorphous semiconductors. *Philos. Mag.* **1970**, *22* (179), 0903–0922. (c) Mott, N. F.; Davis, E. A. *Electronic Processes in Non-Crystalline Materials*; OUP Oxford, **2012**. (d) Makuła, P.; Pacia, M.; Macyk, W. How To Correctly Determine the Band Gap Energy of Modified Semiconductor Photocatalysts Based on UV–Vis Spectra. *J. Phys. Chem. Lett.* **2018**, *9* (23), 6814–6817.
- [S25] Connelly, N. G.; Geiger, W. E. Chemical Redox Agents for Organometallic Chemistry. *Chem. Rev.* **1996**, *96* (2), 877–910.
- [S26] M. J. Frisch, G. W. Trucks, H. B. Schlegel, G. E. Scuseria, M. A. Robb, J. Cheeseman, G. Scalmani, V. Barone, B. Mennucci, G. A. Petersson, H. Nakatsuji, M. Caricato, X. Li, H. P. Hratchian, A. F. Izmaylov, J. Bloino, G. Zheng, J. L. Sonnenberg, M. Hada, M. Ehara, K. Toyota, R. Fukuda, J. Hasegawa, M. Ishida, T. Nakajima, Y. Honda, O. Kitao, H. Nakai, T. Vreven, J. A. Montgomery, Jr. J. E. Peralta, F. Ogliaro, M. Bearpark, J. J. Heyd, E. Brothers, K. N. Kudin, V. N. Staroverov, T. Keith, R. Kobayashi, J. Normand, K. Raghavachari, A. Rendell, J. C. Burant, S. S. Iyengar, J. Tomasi, M. Cossi, N. Rega, J. M. Millam, M. Klene, J. E. Knox, J. B. Cross, V. Bakken, C. Adamo, J. Jaramillo, R. Gomperts, R. E. Stratmann, O. Yazyev, A. J. Austin, R. Cammi, C. Pomelli, J. W. Ochterski, R. L. Martin, K. Morokuma, V. G. Zakrzewski, G. A. Voth, P. Salvador, J. J. Dannenberg, S. Dapprich, A. D. Daniels, O. Farkas, J. B. Foresman, J. V. Ortiz, J. J. Ioslowski and D. J. Fox, *Gaussian 09*, Revision D.01; Gaussian, Inc., Wallingford CT. 2013.
- [S 27 ] Zhao, Y.; Truhlar, D. G. The M06 suite of density functionals for main group thermochemistry, thermochemical kinetics, noncovalent interactions, excited states, and transition elements: two new functionals and systematic testing of four M06-class functionals and 12 other functionals. *Theor. Chem. Acc.* **2007**, *120* (1-3), 215–241.
- [S28] Marenich, A. V.; Cramer, C. J.; Truhlar, D. G. Universal Solvation Model Based on Solute Electron Density and on a Continuum Model of the Solvent Defined by the Bulk Dielectric Constant and Atomic Surface Tensions. *J. Phys. Chem. B* **2009**, *113* (18), 6378–6396.
- [S29] Grimme, S.; Antony, J.; Ehrlich, S.; Krieg, H. A consistent and accurate ab initio parametrization of density functional dispersion correction (DFT-D) for the 94 elements H–Pu. *J. Chem. Phys.* **2010**, *132* (15), 154104–154118.
- [S30] Lu, T.; Chen, F. Multiwfn: A multifunctional wavefunction analyzer. *J. Comput. Chem.* **2011**, *33* (5), 580–592.
- [S31] (a) Konezny, S. J.; Doherty, M. D.; Luca, O. R.; Crabtree, R. H.; Soloveichik, G. L.; Batista, V. S. Reduction of Systematic Uncertainty in DFT Redox Potentials of Transition-Metal Complexes. *J. Phys. Chem. C* **2012**, *116* (10), 6349–6356; (b) Wang, D.; Huang, S.; Wang, C.; Yue, Y.; Zhang, Q. Computational prediction for oxidation and reduction potentials of organic molecules used in organic light-emitting diodes. *Org. Electron.* **2019**, *64*, 216–222; (c) Ortiz-Rodríguez, J. C.; Santana, J. A.; Méndez-Hernández, D. D. Linear correlation

---

models for the redox potential of organic molecules in aqueous solutions. *J. Mol. Model.* **2020**, *26* (4), 70; (d)  
Wang, X.; Li, F.; Zhang, J. Theoretical prediction for redox potentials of oxygen-centered organic anions in aprotic solvents. *Theor. Chem. Acc.* **2023**, *142* (7), 62.
